# Supplementary material for: Tumor arachidonic acid synthesis impairs metabolic fitness of CXCR6+ resident memory CD8+ T cells and drives immunotherapy resistance in hepatocellular carcinoma
Source: Research Square preprint supplement (doi:10.21203/rs.3.rs-7535111/v1), 2025-09-24
Supplement: Supplementary file 1 [file c537856874085c33473eeafc.xlsx]

## Sheet: Contents
	Number	Table Name	Notes
	1	Supplementary Table 1-Patient information for metabolites detection	Related to Figure 1 and Figure 5
	2	Supplementary Table 2-The formulation of chow diet and ARA diet	Related to Figure 1
	3	Supplementary Table 3-Pathways enrichment analysis for CRISPR-Cas9 screening	Related to Figure 2
	4	Supplementary Table 4-Patient information for multiplex IHC staining	Related to Figure 5
	5	Supplementary Table 5-Patient information of Nivolumab treatment	Related to Figure 6
	6	Supplementary Table 6-Public database and online tools used

## Sheet: Patient info for screening
Number	Sex	Age, years	Hepatitis status	First treatment given	Pre-opt AFP (ng/ml)	UICC 8th Grade	Macrovascular invasion	Bile duct invasion	Adjacent organ invasion	Sample types	Assays
1	Male	65	HBV	Surgical resection	15	Stage IB	No	No	No	TIF, Serum	LC-MS/MS (TIF only), ELISA
2	Female	57	HBV	Surgical resection	34736	Stage II	No	No	No	TIF, Serum	LC-MS/MS (TIF only), ELISA
3	Male	50	HBV	Surgical resection	2874	Stage IB	No	No	No	TIF, Serum	LC-MS/MS (TIF only), ELISA
4	Female	54	HBV	Target therapy (Sorafenib)	60000	Stage IVB	Yes	No	Yes	TIF, Serum	LC-MS/MS (TIF only), ELISA
5	Female	64	HBV	TOCE	617	Stage IB	No	No	No	TIF, Serum	LC-MS/MS (TIF only), ELISA
6	Male	63	Non-HBV/HCV/alcoholic hepatitis/steatosis	Surgical resection	8726	Stage II	No	No	No	TIF, Serum	LC-MS/MS (TIF only), ELISA
7	Male	71	Non-HBV/HCV/alcoholic hepatitis/steatosis	Surgical resection	67	Stage IIIB	Yes	No	No	TIF, Serum	LC-MS/MS (TIF only), ELISA
8	Female	80	MASH	Surgical resection	14	Stage IB	No	No	No	TIF, Serum	LC-MS/MS (TIF only), ELISA
9	Male	71	Non-HBV/HCV/alcoholic hepatitis/steatosis	Surgical resection	5607	Stage IVB	Yes	No	Yes	TIF, Serum	LC-MS/MS (TIF only), ELISA
10	Male	73	Alcoholic hepatitis	TOCE	57	Stage IIIA	No	No	No	TIF, Serum	ELISA
11	Male	74	HBV	TOCE	431204	Stage IIIB	Yes	No	No	TIF, Serum	ELISA
12	Male	64	HBV	Surgical resection	2.8	Stage IB	No	No	No	TIF, Serum	ELISA
13	Male	72	HBV	Surgical resection	3	Stage IB	No	No	No	TIF, Serum	ELISA
14	Female	69	Non-HBV/HCV/alcoholic hepatitis/steatosis	Surgical resection	4	Stage IIIA	No	No	No	TIF, Serum	ELISA
15	Male	60	MASH	Surgical resection	261	Stage IIIB	Yes	No	No	TIF, Serum	ELISA
16	Male	81	Alcoholic hepatitis	Surgical resection	5.3	Stage IIIA	No	No	No	TIF, Serum	ELISA

## Sheet: Diet formulation
		Chow diet		1.5% ARA diet
		gm%	kcal%	gm%	kcal%
	Protein	0.208	0.2042	0.208	0.2042
	Carbohydrate	0.615	0.6037	0.615	0.6037
	Fat	0.072	0.1921	0.072	0.1921
	Total		1		1
	kcal/gm	4.075		4.075
	Ingredient	gm	kcal	gm	kcal
	Casein	205	820	205	820
	L-Cystine	3	12	3	12
	Corn Starch	368	1472	368	1472
	Maltodextrin	135	540	135	540
	Sucrose	102	408	102	408
	Cellulose	51	0	51	0
	Soybean Oil	72	648	72	648
	Cocoa Butter	15	135	0	0
	Mineral Mix	36	0	36	0
	Vitamin Mix	10	40	10	40
	Choline Bitartrate	3	0	3	0
	TBHQ	0.01	0	0.01	0
	Arachidonic Acid (ARA)	0	0	15	135
	Total	1000	4075	1000	4075

## Sheet: CRISPR-Cas9 screening
	Number	libraries	cell type	id	neg|score	neg|p-value	pos|score	pos|p-value
	1	Lib5	Tcm	PURINE_RIBONUCLEOSIDE_MONOPHOSPHATE_BIOSYNTHESIS	0.857069	0.001	0.203126	0.575
	2	Lib5	Tcm	VALINE_LEUCINE_AND_ISOLEUCINE_BIOSYNTHESIS	0.794023	0.001	0.0046558	0.998
	3	Lib5	Tcm	TRNA_AMINOACYLATION	0.766623	0.001	0.0342368	0.959
	4	Lib5	Tcm	AMINOACYL_TRNA_BIOSYNTHESIS	0.759224	0.001	0.0351525	0.967
	5	Lib5	Tcm	METABOLISM_OF_RNA	0.659159	0.001	0.0510898	0.935
	6	Lib5	Tcm	METABOLISM_OF_MRNA	0.659159	0.001	0.0510898	0.934
	7	Lib5	Tcm	SYNTHESIS_OF_DNA	0.659159	0.001	0.0510898	0.952
	8	Lib5	Tcm	REGULATION_OF_ORNITHINE_DECARBOXYLASE_ODC	0.582319	0.001	0.0441078	0.938
	9	Lib5	Tcm	OXPHO_COMPLEX_I	0.565563	0.001	0.115887	0.77
	10	Lib5	Tcm	RESPIRATORY_ELECTRON_TRANSPORT	0.506988	0.001	0.031139	0.981
	11	Lib5	Tcm	OXIDATIVE_PHOSPHORYLATION	0.489997	0.001	0.0154016	0.998
	12	Lib5	Tcm	TCA_CYCLE_AND_RESPIRATORY_ELECTRON_TRANSPORT	0.470234	0.001	0.016839	0.999
	13	Lib5	Tcm	PYRUVATE_METABOLISM_AND_CITRIC_ACID_TCA_CYCLE	0.451101	0.001	0.0541476	0.93
	14	Lib5	Tcm	METABOLISM_OF_PROTEINS	0.291022	0.001	0.0907336	0.907
	15	Lib5	Tcm	PORPHYRIN_AND_CHLOROPHYLL_METABOLISM	0.472613	0.001	0.0866914	0.839
	16	Lib5	Tcm	ASPARAGINE_N_LINKED_GLYCOSYLATION	0.398413	0.001	0.124494	0.711
	17	Lib5	Tcm	SYNTHESIS_OF_SUBSTRATES_IN_N_GLYCAN_BIOSYTHESIS	0.589895	0.002	0.20894	0.488
	18	Lib5	Tcm	IRON_UPTAKE_AND_TRANSPORT	0.444633	0.002	0.056489	0.922
	19	Lib5	Tcm	METABOLISM_OF_PORPHYRINS	0.607954	0.003	0.0694775	0.89
	20	Lib5	Tcm	METABOLISM_OF_AMINO_ACIDS_AND_DERIVATIVES	0.265023	0.005	0.0413174	0.996
	21	Lib5	Tcm	TCA_CYCLE	0.442333	0.006	0.00200669	1
	22	Lib5	Tcm	UNFOLDED_PROTEIN_RESPONSE	0.690437	0.007	0.232631	0.548
	23	Lib5	Tcm	TERPENOID_BACKBONE_BIOSYNTHESIS	0.575855	0.008	0.127454	0.726
	24	Lib5	Tcm	LACTATE_GENERATION	0.852178	0.012	0.0841624	0.86
	25	Lib5	Tcm	OXPHO_COMPLEX_V	0.559673	0.012	0.175963	0.643
	26	Lib5	Tcm	GLUCONEOGENESIS	0.399956	0.012	0.140692	0.671
	27	Lib5	Tcm	GLUTAMINOLYSIS	0.566309	0.013	0.14661	0.682
	28	Lib5	Tcm	METABOLISM_OF_VITAMINS_AND_COFACTORS	0.341758	0.013	0.0882898	0.852
	29	Lib5	Tcm	N_GLYCAN_BIOSYNTHESIS	0.365887	0.016	0.202515	0.384
	30	Lib5	Tcm	ALANINE_ASPARTATE_AND_GLUTAMATE_METABOLISM	0.375703	0.018	0.16612	0.559
	31	Lib5	Tcm	PENTOSE_PHOSPHATE	0.65244	0.019	0.0166058	0.964
	32	Lib5	Tcm	ONE_CARBON_POOL_BY_FOLATE	0.485601	0.019	0.130897	0.719
	33	Lib5	Tcm	AMINO_SUGAR_AND_NUCLEOTIDE_SUGAR_METABOLISM	0.344923	0.019	0.192945	0.371
	34	Lib5	Tcm	SELENOAMINO_ACID_METABOLISM	0.43302	0.025	0.155019	0.614
	35	Lib5	Tcm	SYNTHESIS_OF_PIPS_AT_THE_LATE_ENDOSOME_MEMBRANE	0.640287	0.033	0.326167	0.427
	36	Lib5	Tcm	GLYCOLYSIS	0.355513	0.036	0.117837	0.735
	37	Lib5	Tcm	ADVANCED_GLYCOSYLATION_ENDPRODUCT_RECEPTOR_SIGNALING	0.881717	0.037	0.868028	0.044
	38	Lib5	Tcm	TERMINATION_OF_O_GLYCAN_BIOSYNTHESIS	0.541149	0.042	0.264176	0.449
	39	Lib5	Tcm	ACTIVATION_OF_GENES_BY_ATF4	0.827918	0.046	0.668512	0.211
	40	Lib5	Tcm	LIPOGENESIS	0.323336	0.047	0.200281	0.392
	41	Lib5	Tcm	METABOLISM_OF_NUCLEOTIDES	0.27439	0.048	0.0873872	0.888
	42	Lib5	Tcm	OXPHO_COMPLEX_IV	0.415136	0.05	0.164257	0.6
	43	Lib5	Tcm	SYNTHESIS_AND_INTERCONVERSION_OF_NUCLEOTIDE_DI_AND_TRIPHOSPHATES	0.421054	0.054	0.209205	0.478
	44	Lib5	Tcm	REGULATION_OF_AUTOPHAGY	0.665531	0.058	0.518872	0.219
	45	Lib5	Tcm	IONOTROPIC_ACTIVITY_OF_KAINATE_RECEPTORS	0.574391	0.059	0.573467	0.065
	46	Lib5	Tcm	REGULATION_OF_HYPOXIA_INDUCIBLE_FACTOR_HIF_BY_OXYGEN	0.509709	0.06	0.193315	0.604
	47	Lib5	Tcm	REGULATION_OF_GLUCOKINASE_BY_GLUCOKINASE_REGULATORY_PROTEIN	0.743798	0.063	0.890653	0.007
	48	Lib5	Tcm	OXPHO_COMPLEX_II	0.668051	0.063	0.0706702	0.88
	49	Lib5	Tcm	OXYGEN_DEPENDENT_PROLINE_HYDROXYLATION_OF_HYPOXIA_INDUCIBLE_FACTOR_ALPHA	0.567014	0.066	0.345191	0.368
	50	Lib5	Tcm	SGOCP_ALL	0.2614	0.071	0.121931	0.725
	51	Lib5	Tcm	GLYCOLYSIS_GLUCONEOGENESIS	0.273511	0.073	0.227186	0.181
	52	Lib5	Tcm	SYNTHESIS_OF_PIPS_AT_THE_GOLGI_MEMBRANE	0.420083	0.076	0.139504	0.698
	53	Lib5	Tcm	SYNTHESIS_OF_PIPS_AT_THE_EARLY_ENDOSOME_MEMBRANE	0.480173	0.08	0.240999	0.463
	54	Lib5	Tcm	CHOLESTEROGENESIS	0.347947	0.083	0.209437	0.437
	55	Lib5	Tcm	ENDOCYTOSIS	0.62557	0.084	0.607723	0.11
	56	Lib5	Tcm	METABOLISM_OF_POLYAMINES	0.420197	0.084	0.174766	0.588
	57	Lib5	Tcm	PROLINE_SYNTHESIS	0.618952	0.091	0.390341	0.355
	58	Lib5	Tcm	SPHINGOLIPID_DE_NOVO_BIOSYNTHESIS	0.345753	0.094	0.219666	0.424
	59	Lib5	Tcm	PENTOSE_AND_GLUCURONATE_INTERCONVERSIONS	0.381667	0.099	0.203159	0.495
	60	Lib5	Tcm	RIBOFLAVIN_METABOLISM	0.428367	0.104	0.414457	0.103
	61	Lib5	Tcm	LYSOSOME_VESICLE_BIOGENESIS	0.656447	0.114	0.859676	0.01
	62	Lib5	Tcm	LYSINE_DEGRADATION	0.326084	0.115	0.238139	0.34
	63	Lib5	Tcm	KERATAN_SULFATE_DEGRADATION	0.553437	0.118	0.773258	0.009
	64	Lib5	Tcm	SULFUR_AMINO_ACID_METABOLISM	0.324976	0.131	0.0792014	0.855
	65	Lib5	Tcm	VITAMIN_B5_PANTOTHENATE_METABOLISM	0.409561	0.134	0.0325272	0.955
	66	Lib5	Tcm	CERAMIDE_PATHWAY	0.494152	0.135	0.251583	0.538
	67	Lib5	Tcm	GLYOXYLATE_AND_DICARBOXYLATE_METABOLISM	0.350518	0.135	0.190326	0.554
	68	Lib5	Tcm	PANTOTHENATE_AND_COA_BIOSYNTHESIS	0.356776	0.151	0.260201	0.364
	69	Lib5	Tcm	AMINO_ACID_SYNTHESIS_AND_INTERCONVERSION_TRANSAMINATION	0.365281	0.152	0.147925	0.676
	70	Lib5	Tcm	GOLGI_ASSOCIATED_VESICLE_BIOGENESIS	0.538137	0.153	0.381428	0.294
	71	Lib5	Tcm	METABOLISM_OF_CARBOHYDRATES	0.187863	0.183	0.194475	0.147
	72	Lib5	Tcm	LIMONENE_AND_PINENE_DEGRADATION	0.380965	0.185	0.357789	0.245
	73	Lib5	Tcm	PGC1A_PATHWAY	0.615824	0.187	0.525683	0.254
	74	Lib5	Tcm	CHYLOMICRON_MEDIATED_LIPID_TRANSPORT	0.344972	0.19	0.289549	0.327
	75	Lib5	Tcm	OXPHO_COMPLEX_III	0.550603	0.191	0.146317	0.737
	76	Lib5	Tcm	CYSTEINE_AND_METHIONINE_METABOLISM	0.273747	0.192	0.246002	0.275
	77	Lib5	Tcm	GLUCOSE_METABOLISM	0.243407	0.193	0.14086	0.629
	78	Lib5	Tcm	HIF_PATHWAY	0.421571	0.194	0.25389	0.476
	79	Lib5	Tcm	OTHER_GLYCAN_DEGRADATION	0.314174	0.195	0.0468183	0.925
	80	Lib5	Tcm	REGULATION_OF_PYRUVATE_DEHYDROGENASE_PDH_COMPLEX	0.383465	0.197	0.193428	0.564
	81	Lib5	Tcm	PTM_GAMMA_CARBOXYLATION_HYPUSINE_FORMATION_AND_ARYLSULFATASE_ACTIVATION	0.371559	0.198	0.31903	0.287
	82	Lib5	Tcm	REGULATION_OF_INSULIN_SECRETION_BY_ACETYLCHOLINE	0.436903	0.21	0.691567	0.01
	83	Lib5	Tcm	GLUTATHIONE_METABOLISM	0.229426	0.217	0.135634	0.688
	84	Lib5	Tcm	LYSOSOME	0.219338	0.228	0.157594	0.515
	85	Lib5	Tcm	PROPANOATE_METABOLISM	0.249586	0.231	0.341315	0.05
	86	Lib5	Tcm	PEROXISOMAL_LIPID_METABOLISM	0.272239	0.235	0.280697	0.236
	87	Lib5	Tcm	GLUCURONIDATION	0.343907	0.254	0.181966	0.625
	88	Lib5	Tcm	GLYCEROPHOSPHOLIPID_METABOLISM	0.197437	0.257	0.0933966	0.849
	89	Lib5	Tcm	ANDROGEN_BIOSYNTHESIS	0.384036	0.259	0.676223	0.02
	90	Lib5	Tcm	KERATAN_SULFATE_BIOSYNTHESIS	0.270442	0.27	0.26596	0.282
	91	Lib5	Tcm	PYRUVATE_to_ACETYL_coA	0.408981	0.275	0.0112844	0.987
	92	Lib5	Tcm	ACTIVATION_OF_KAINATE_RECEPTORS_UPON_GLUTAMATE_BINDING	0.325183	0.275	0.527269	0.03
	93	Lib5	Tcm	METABOLISM_OF_STEROID_HORMONES_AND_VITAMINS_A_AND_D	0.245414	0.275	0.440197	0.009
	94	Lib5	Tcm	NITROGEN_METABOLISM	0.262511	0.276	0.267429	0.261
	95	Lib5	Tcm	FOLATE_BIOSYNTHESIS	0.349389	0.277	0.467087	0.11
	96	Lib5	Tcm	POST_TRANSLATIONAL_MODIFICATION_SYNTHESIS_OF_GPI_ANCHORED_PROTEINS	0.25508	0.277	0.189716	0.492
	97	Lib5	Tcm	CHREBP2_PATHWAY	0.375697	0.279	0.554588	0.084
	98	Lib5	Tcm	BIOSYNTHESIS_OF_UNSATURATED_FATTY_ACIDS	0.276999	0.287	0.323485	0.172
	99	Lib5	Tcm	DRUG_METABOLISM_OTHER_ENZYMES	0.234332	0.288	0.112982	0.75
	100	Lib5	Tcm	SPHINGOLIPID_METABOLISM	0.202584	0.295	0.167744	0.496
	101	Lib5	Tcm	FRUCTOSE_AND_MANNOSE_METABOLISM	0.230105	0.303	0.274054	0.173
	102	Lib5	Tcm	STEROID_BIOSYNTHESIS	0.276829	0.31	0.462105	0.027
	103	Lib5	Tcm	FATTY_ACID_ACTIVATION_UPTAKE	0.291998	0.314	0.284998	0.325
	104	Lib5	Tcm	INOSITOL_PHOSPHATE_METABOLISM	0.202959	0.314	0.110763	0.803
	105	Lib5	Tcm	ALPHA_LINOLENIC_ACID_METABOLISM	0.233579	0.322	0.238071	0.308
	106	Lib5	Tcm	GLUCOSE_TRANSPORT	0.274087	0.345	0.412428	0.071
	107	Lib5	Tcm	GH_PATHWAY	0.31549	0.348	0.414765	0.155
	108	Lib5	Tcm	KERATAN_SULFATE_KERATIN_METABOLISM	0.237706	0.348	0.325487	0.114
	109	Lib5	Tcm	PASSIVE_TRANSPORT_BY_AQUAPORINS	0.300523	0.349	0.63908	0.005
	110	Lib5	Tcm	GLYCOSYLPHOSPHATIDYLINOSITOL_GPI_ANCHOR_BIOSYNTHESIS	0.22491	0.354	0.195451	0.461
	111	Lib5	Tcm	O_GLYCAN_BIOSYNTHESIS	0.21836	0.375	0.151428	0.642
	112	Lib5	Tcm	DIGESTION_OF_DIETARY_CARBOHYDRATE	0.35643	0.377	0.202124	0.592
	113	Lib5	Tcm	CHONDROITIN_SULFATE_DERMATAN_SULFATE_METABOLISM	0.203873	0.399	0.266351	0.204
	114	Lib5	Tcm	ARGININE_AND_PROLINE_METABOLISM	0.188342	0.418	0.251387	0.127
	115	Lib5	Tcm	POLYAMINE_SYNTHESIS	0.307718	0.419	0.0929306	0.832
	116	Lib5	Tcm	SYNTHESIS_OF_PIPS_AT_THE_PLASMA_MEMBRANE	0.199465	0.422	0.295369	0.14
	117	Lib5	Tcm	KETOLYSIS	0.306715	0.423	0.594887	0.087
	118	Lib5	Tcm	ABACAVIR_TRANSPORT_AND_METABOLISM	0.24975	0.427	0.208639	0.527
	119	Lib5	Tcm	ETHANOL_OXIDATION	0.2595	0.432	0.639992	0.011
	120	Lib5	Tcm	TRIGLYCERIDE_BIOSYNTHESIS	0.186408	0.438	0.234155	0.263
	121	Lib5	Tcm	PURINE_METABOLISM	0.157237	0.451	0.107678	0.812
	122	Lib5	Tcm	ASCORBATE_AND_ALDARATE_METABOLISM	0.244711	0.455	0.281106	0.347
	123	Lib5	Tcm	SYNTHESIS_OF_PC	0.219153	0.46	0.141295	0.678
	124	Lib5	Tcm	AQUAPORIN_MEDIATED_TRANSPORT	0.210964	0.461	0.44295	0.008
	125	Lib5	Tcm	KETOGENESIS	0.289121	0.464	0.520032	0.118
	126	Lib5	Tcm	BILE_SALT_AND_ORGANIC_ANION_SLC_TRANSPORTERS	0.241173	0.467	0.409082	0.14
	127	Lib5	Tcm	PYRIMIDINE_METABOLISM	0.168535	0.467	0.21351	0.289
	128	Lib5	Tcm	HYALURONAN_METABOLISM	0.235422	0.468	0.49808	0.041
	129	Lib5	Tcm	HEPARAN_SULFATE_HEPARIN_HS_GAG_METABOLISM	0.183453	0.485	0.345235	0.031
	130	Lib5	Tcm	PEROXISOME	0.184888	0.496	0.250644	0.26
	131	Lib5	Tcm	SYNTHESIS_OF_BILE_ACIDS_AND_BILE_SALTS_VIA_24_HYDROXYCHOLESTEROL	0.212576	0.515	0.503321	0.041
	132	Lib5	Tcm	PAR1_PATHWAY	0.248008	0.521	0.662166	0.01
	133	Lib5	Tcm	LIPOPROTEIN_METABOLISM	0.203494	0.521	0.329985	0.187
	134	Lib5	Tcm	ABC_TRANSPORTERS	0.161126	0.541	0.151763	0.603
	135	Lib5	Tcm	PHENYLALANINE_METABOLISM	0.187859	0.545	0.364611	0.102
	136	Lib5	Tcm	METAL_ION_SLC_TRANSPORTERS	0.184389	0.547	0.332896	0.117
	137	Lib5	Tcm	SYNTHESIS_OF_PE	0.210568	0.558	0.147401	0.743
	138	Lib5	Tcm	GLYCOGEN_BREAKDOWN_GLYCOGENOLYSIS	0.217163	0.567	0.615908	0.02
	139	Lib5	Tcm	GLYCOSAMINOGLYCAN_METABOLISM	0.147536	0.577	0.303722	0.006
	140	Lib5	Tcm	PURINE_CATABOLISM	0.200172	0.578	0.310482	0.3
	141	Lib5	Tcm	PYRIMIDINE_CATABOLISM	0.194762	0.579	0.492417	0.051
	142	Lib5	Tcm	PURINE_SALVAGE	0.184752	0.588	0.304994	0.263
	143	Lib5	Tcm	PROLINE_DEGRADATION	0.244857	0.591	0.254479	0.585
	144	Lib5	Tcm	O_LINKED_GLYCOSYLATION_OF_MUCINS	0.152728	0.597	0.198072	0.378
	145	Lib5	Tcm	NITRIC_OXIDE_STIMULATES_GUANYLATE_CYCLASE	0.160116	0.599	0.262442	0.253
	146	Lib5	Tcm	GLYCOSPHINGOLIPID_METABOLISM	0.165048	0.602	0.240696	0.3
	147	Lib5	Tcm	NUCLEARRS_PATHWAY	0.181572	0.612	0.375014	0.164
	148	Lib5	Tcm	TRANSPORT_OF_VITAMINS_NUCLEOSIDES_AND_RELATED_MOLECULES	0.153455	0.612	0.157562	0.567
	149	Lib5	Tcm	STARCH_AND_SUCROSE_METABOLISM	0.143656	0.615	0.157233	0.585
	150	Lib5	Tcm	PYRUVATE_METABOLISM	0.142876	0.622	0.201702	0.34
	151	Lib5	Tcm	REGULATION_OF_WATER_BALANCE_BY_RENAL_AQUAPORINS	0.159968	0.631	0.427042	0.042
	152	Lib5	Tcm	TRYPTOPHAN_METABOLISM	0.149163	0.631	0.283419	0.118
	153	Lib5	Tcm	GLYCEROPHOSPHOLIPID_BIOSYNTHESIS	0.134907	0.635	0.178757	0.384
	154	Lib5	Tcm	ETHER_LIPID_METABOLISM	0.145803	0.653	0.238527	0.317
	155	Lib5	Tcm	GALACTOSE_METABOLISM	0.145693	0.654	0.186363	0.496
	156	Lib5	Tcm	AMINO_ACID_AND_OLIGOPEPTIDE_SLC_TRANSPORTERS	0.132111	0.656	0.184351	0.395
	157	Lib5	Tcm	LINOLEIC_ACID_METABOLISM	0.13953	0.662	0.355439	0.09
	158	Lib5	Tcm	PHOSPHOLIPID_METABOLISM	0.126844	0.663	0.142154	0.518
	159	Lib5	Tcm	NICOTINATE_AND_NICOTINAMIDE_METABOLISM	0.149562	0.674	0.342513	0.105
	160	Lib5	Tcm	SYNTHESIS_OF_VERY_LONG_CHAIN_FATTY_ACYL_COAS	0.147097	0.683	0.261926	0.373
	161	Lib5	Tcm	ALDOSTERONE_REGULATED_SODIUM_REABSORPTION	0.134846	0.687	0.210505	0.424
	162	Lib5	Tcm	BETA_OXIDATION	0.125458	0.692	0.28649	0.123
	163	Lib5	Tcm	PRIMARY_BILE_ACID_BIOSYNTHESIS	0.133089	0.694	0.310947	0.199
	164	Lib5	Tcm	TAURINE_AND_HYPOTAURINE_METABOLISM	0.140076	0.709	0.388708	0.206
	165	Lib5	Tcm	TRANSPORT_OF_GLUCOSE_AND_OTHER_SUGARS_BILE_SALTS_AND_ORGANIC_ACIDS_METAL_IONS_AND_AMINE_COMPOUNDS	0.124613	0.714	0.201682	0.199
	166	Lib5	Tcm	SYNTHESIS_OF_PA	0.128084	0.716	0.338079	0.107
	167	Lib5	Tcm	BETA_ALANINE_METABOLISM	0.115535	0.734	0.431525	0.01
	168	Lib5	Tcm	FATTY_ACID_TRIACYLGLYCEROL_AND_KETONE_BODY_METABOLISM	0.115123	0.735	0.182491	0.31
	169	Lib5	Tcm	LIPID_DIGESTION_MOBILIZATION_AND_TRANSPORT	0.122246	0.738	0.315482	0.094
	170	Lib5	Tcm	SYNTHESIS_OF_BILE_ACIDS_AND_BILE_SALTS_VIA_7ALPHA_HYDROXYCHOLESTEROL	0.131369	0.739	0.331874	0.177
	171	Lib5	Tcm	BILE_ACID_AND_BILE_SALT_METABOLISM	0.123608	0.744	0.281053	0.203
	172	Lib5	Tcm	SYNTHESIS_OF_BILE_ACIDS_AND_BILE_SALTS	0.109436	0.76	0.315845	0.192
	173	Lib5	Tcm	BRANCHED_CHAIN_AMINO_ACID_CATABOLISM	0.108564	0.802	0.218072	0.471
	174	Lib5	Tcm	AMINE_COMPOUND_SLC_TRANSPORTERS	0.0983296	0.802	0.25077	0.246
	175	Lib5	Tcm	ION_CHANNEL_TRANSPORT	0.101554	0.809	0.109358	0.8
	176	Lib5	Tcm	GLYCINE_SERINE_AND_THREONINE_METABOLISM	0.0976092	0.817	0.332646	0.054
	177	Lib5	Tcm	HISTIDINE_METABOLISM	0.096429	0.818	0.426276	0.023
	178	Lib5	Tcm	ACYL_CHAIN_REMODELLING_OF_PC_PE_PG_PS	0.0917741	0.824	0.320064	0.129
	179	Lib5	Tcm	CHOLINE	0.0960848	0.827	0.0609594	0.903
	180	Lib5	Tcm	GLYCEROLIPID_METABOLISM	0.0891626	0.835	0.374108	0.01
	181	Lib5	Tcm	PPAR_SIGNALING_PATHWAY	0.0954984	0.841	0.179398	0.418
	182	Lib5	Tcm	METABOLISM_OF_LIPIDS_AND_LIPOPROTEINS	0.106571	0.844	0.16149	0.255
	183	Lib5	Tcm	METABOLISM_OF_XENOBIOTICS_BY_CYTOCHROME_P450	0.0855612	0.849	0.198465	0.385
	184	Lib5	Tcm	FATTY_ACID_METABOLISM	0.081606	0.861	0.274953	0.139
	185	Lib5	Tcm	TRANSMEMBRANE_TRANSPORT_OF_SMALL_MOLECULES	0.10269	0.869	0.145654	0.407
	186	Lib5	Tcm	SULFUR_METABOLISM	0.0664894	0.877	0.150598	0.679
	187	Lib5	Tcm	BUTANOATE_METABOLISM	0.0740107	0.882	0.396624	0.011
	188	Lib5	Tcm	VALINE_LEUCINE_AND_ISOLEUCINE_DEGRADATION	0.0765062	0.883	0.377036	0.011
	189	Lib5	Tcm	TANDEM_PORE_DOMAIN_POTASSIUM_CHANNELS	0.0641836	0.889	0.565827	0.022
	190	Lib5	Tcm	ARACHIDONIC_ACID_METABOLISM	0.0800364	0.89	0.244266	0.162
	191	Lib5	Tcm	STEROID_HORMONE_BIOSYNTHESIS	0.0699939	0.891	0.28316	0.13
	192	Lib5	Tcm	TYROSINE_METABOLISM	0.0734854	0.899	0.296584	0.118
	193	Lib5	Tcm	INTEGRATION_OF_ENERGY_METABOLISM	0.0574983	0.914	0.412376	0.001
	194	Lib5	Tcm	TRYPTOPHAN_CATABOLISM	0.0352643	0.915	0.379433	0.217
	195	Lib5	Tcm	DRUG_METABOLISM_CYTOCHROME_P450	0.0539789	0.92	0.263402	0.135
	196	Lib5	Tcm	RETINOL_METABOLISM	0.0517235	0.922	0.345536	0.035
	197	Lib5	Tcm	VOLTAGE_GATED_POTASSIUM_CHANNELS	0.0564706	0.944	0.279785	0.097
	198	Lib5	Tcm	SLC_MEDIATED_TRANSMEMBRANE_TRANSPORT	0.0710162	0.962	0.191921	0.105
	199	Lib5	Tcm	MITOCHONDRIAL_FATTY_ACID_BETA_OXIDATION	0.0213049	0.968	0.408591	0.084
	200	Lib5	Tcm	POTASSIUM_CHANNELS	0.0264245	0.993	0.338279	0.001
	201	Lib5	Tem_liver	OXPHO_COMPLEX_II	0.922031	0.001	0.00165892	0.996
	202	Lib5	Tem_liver	SYNTHESIS_OF_DNA	0.824689	0.001	0.0448869	0.935
	203	Lib5	Tem_liver	METABOLISM_OF_RNA	0.824689	0.001	0.0448869	0.941
	204	Lib5	Tem_liver	METABOLISM_OF_MRNA	0.824689	0.001	0.0448869	0.944
	205	Lib5	Tem_liver	PURINE_RIBONUCLEOSIDE_MONOPHOSPHATE_BIOSYNTHESIS	0.805819	0.001	0.103771	0.8
	206	Lib5	Tem_liver	TRNA_AMINOACYLATION	0.802111	0.001	0.0338218	0.973
	207	Lib5	Tem_liver	AMINOACYL_TRNA_BIOSYNTHESIS	0.785596	0.001	0.0360947	0.963
	208	Lib5	Tem_liver	OXPHO_COMPLEX_I	0.764591	0.001	0.100661	0.772
	209	Lib5	Tem_liver	REGULATION_OF_ORNITHINE_DECARBOXYLASE_ODC	0.743156	0.001	0.0404204	0.958
	210	Lib5	Tem_liver	TERPENOID_BACKBONE_BIOSYNTHESIS	0.692651	0.001	0.120582	0.774
	211	Lib5	Tem_liver	OXIDATIVE_PHOSPHORYLATION	0.627599	0.001	0.0278866	0.996
	212	Lib5	Tem_liver	RESPIRATORY_ELECTRON_TRANSPORT	0.621311	0.001	0.0503592	0.958
	213	Lib5	Tem_liver	IRON_UPTAKE_AND_TRANSPORT	0.596476	0.001	0.0676158	0.905
	214	Lib5	Tem_liver	TCA_CYCLE_AND_RESPIRATORY_ELECTRON_TRANSPORT	0.547849	0.001	0.0290224	0.994
	215	Lib5	Tem_liver	PORPHYRIN_AND_CHLOROPHYLL_METABOLISM	0.497279	0.001	0.0894968	0.84
	216	Lib5	Tem_liver	ASPARAGINE_N_LINKED_GLYCOSYLATION	0.38406	0.001	0.0824166	0.866
	217	Lib5	Tem_liver	METABOLISM_OF_PROTEINS	0.325454	0.001	0.157019	0.438
	218	Lib5	Tem_liver	SYNTHESIS_OF_PIPS_AT_THE_LATE_ENDOSOME_MEMBRANE	0.749427	0.001	0.235712	0.6
	219	Lib5	Tem_liver	PYRUVATE_METABOLISM_AND_CITRIC_ACID_TCA_CYCLE	0.475873	0.001	0.19952	0.362
	220	Lib5	Tem_liver	PENTOSE_PHOSPHATE	0.788323	0.002	0.00896712	0.982
	221	Lib5	Tem_liver	OXPHO_COMPLEX_IV	0.569649	0.002	0.215407	0.428
	222	Lib5	Tem_liver	AMINO_SUGAR_AND_NUCLEOTIDE_SUGAR_METABOLISM	0.389734	0.002	0.135501	0.648
	223	Lib5	Tem_liver	METABOLISM_OF_NUCLEOTIDES	0.359067	0.002	0.0808318	0.897
	224	Lib5	Tem_liver	METABOLISM_OF_PORPHYRINS	0.588881	0.003	0.0670416	0.88
	225	Lib5	Tem_liver	N_GLYCAN_BIOSYNTHESIS	0.416754	0.003	0.127255	0.687
	226	Lib5	Tem_liver	SYNTHESIS_AND_INTERCONVERSION_OF_NUCLEOTIDE_DI_AND_TRIPHOSPHATES	0.533636	0.004	0.130681	0.702
	227	Lib5	Tem_liver	ADVANCED_GLYCOSYLATION_ENDPRODUCT_RECEPTOR_SIGNALING	0.958886	0.005	0.515716	0.375
	228	Lib5	Tem_liver	METABOLISM_OF_AMINO_ACIDS_AND_DERIVATIVES	0.258578	0.006	0.0939779	0.872
	229	Lib5	Tem_liver	ENDOCYTOSIS	0.795879	0.007	0.390485	0.343
	230	Lib5	Tem_liver	VITAMIN_B5_PANTOTHENATE_METABOLISM	0.599164	0.007	0.15451	0.686
	231	Lib5	Tem_liver	VALINE_LEUCINE_AND_ISOLEUCINE_BIOSYNTHESIS	0.584574	0.007	0.00399069	0.991
	232	Lib5	Tem_liver	OXPHO_COMPLEX_V	0.571788	0.01	0.165434	0.64
	233	Lib5	Tem_liver	LACTATE_GENERATION	0.825934	0.017	0.195858	0.701
	234	Lib5	Tem_liver	TCA_CYCLE	0.400718	0.017	0.124562	0.727
	235	Lib5	Tem_liver	REGULATION_OF_AUTOPHAGY	0.759805	0.018	0.363122	0.375
	236	Lib5	Tem_liver	ONE_CARBON_POOL_BY_FOLATE	0.47608	0.019	0.190697	0.531
	237	Lib5	Tem_liver	INOSITOL_PHOSPHATE_METABOLISM	0.324162	0.021	0.153907	0.554
	238	Lib5	Tem_liver	CHOLESTEROGENESIS	0.411724	0.023	0.263003	0.248
	239	Lib5	Tem_liver	SGOCP_ALL	0.320143	0.023	0.0914901	0.851
	240	Lib5	Tem_liver	SYNTHESIS_OF_SUBSTRATES_IN_N_GLYCAN_BIOSYTHESIS	0.480322	0.025	0.110335	0.821
	241	Lib5	Tem_liver	GLYCOLYSIS	0.381446	0.025	0.141589	0.641
	242	Lib5	Tem_liver	GOLGI_ASSOCIATED_VESICLE_BIOGENESIS	0.682316	0.028	0.385815	0.286
	243	Lib5	Tem_liver	ALANINE_ASPARTATE_AND_GLUTAMATE_METABOLISM	0.368113	0.03	0.0887252	0.829
	244	Lib5	Tem_liver	TERMINATION_OF_O_GLYCAN_BIOSYNTHESIS	0.572264	0.031	0.316084	0.3
	245	Lib5	Tem_liver	METABOLISM_OF_VITAMINS_AND_COFACTORS	0.292706	0.051	0.118301	0.736
	246	Lib5	Tem_liver	POST_TRANSLATIONAL_MODIFICATION_SYNTHESIS_OF_GPI_ANCHORED_PROTEINS	0.377205	0.056	0.360974	0.06
	247	Lib5	Tem_liver	SPHINGOLIPID_DE_NOVO_BIOSYNTHESIS	0.377818	0.057	0.100886	0.798
	248	Lib5	Tem_liver	IONOTROPIC_ACTIVITY_OF_KAINATE_RECEPTORS	0.593957	0.061	0.420591	0.219
	249	Lib5	Tem_liver	METABOLISM_OF_POLYAMINES	0.443211	0.065	0.220179	0.478
	250	Lib5	Tem_liver	ALDOSTERONE_REGULATED_SODIUM_REABSORPTION	0.340032	0.074	0.181443	0.528
	251	Lib5	Tem_liver	FOLATE_BIOSYNTHESIS	0.501618	0.082	0.496132	0.086
	252	Lib5	Tem_liver	CERAMIDE_PATHWAY	0.577501	0.085	0.27902	0.47
	253	Lib5	Tem_liver	SYNTHESIS_OF_PIPS_AT_THE_GOLGI_MEMBRANE	0.390224	0.09	0.132585	0.722
	254	Lib5	Tem_liver	OXPHO_COMPLEX_III	0.629139	0.091	0.0836098	0.851
	255	Lib5	Tem_liver	GLYCOLYSIS_GLUCONEOGENESIS	0.258105	0.097	0.186476	0.381
	256	Lib5	Tem_liver	PANTOTHENATE_AND_COA_BIOSYNTHESIS	0.377923	0.111	0.433837	0.047
	257	Lib5	Tem_liver	CYSTEINE_AND_METHIONINE_METABOLISM	0.310697	0.112	0.178601	0.535
	258	Lib5	Tem_liver	ACTIVATION_OF_GENES_BY_ATF4	0.756642	0.116	0.71881	0.166
	259	Lib5	Tem_liver	PGC1A_PATHWAY	0.66136	0.121	0.629614	0.17
	260	Lib5	Tem_liver	ETHANOL_OXIDATION	0.466615	0.122	0.636088	0.013
	261	Lib5	Tem_liver	REGULATION_OF_PYRUVATE_DEHYDROGENASE_PDH_COMPLEX	0.419193	0.124	0.41124	0.143
	262	Lib5	Tem_liver	ABACAVIR_TRANSPORT_AND_METABOLISM	0.405088	0.134	0.326607	0.284
	263	Lib5	Tem_liver	UNFOLDED_PROTEIN_RESPONSE	0.463036	0.136	0.494595	0.115
	264	Lib5	Tem_liver	FRUCTOSE_AND_MANNOSE_METABOLISM	0.284317	0.139	0.172511	0.57
	265	Lib5	Tem_liver	GLUCURONIDATION	0.414441	0.148	0.384521	0.177
	266	Lib5	Tem_liver	LYSINE_DEGRADATION	0.316867	0.148	0.0888856	0.843
	267	Lib5	Tem_liver	GLYOXYLATE_AND_DICARBOXYLATE_METABOLISM	0.335894	0.149	0.236879	0.424
	268	Lib5	Tem_liver	SYNTHESIS_OF_PIPS_AT_THE_EARLY_ENDOSOME_MEMBRANE	0.421425	0.15	0.283598	0.387
	269	Lib5	Tem_liver	LIPOGENESIS	0.266738	0.15	0.159874	0.586
	270	Lib5	Tem_liver	PHOSPHOLIPID_METABOLISM	0.193017	0.15	0.136748	0.565
	271	Lib5	Tem_liver	KERATAN_SULFATE_BIOSYNTHESIS	0.324781	0.151	0.215512	0.419
	272	Lib5	Tem_liver	LYSOSOME_VESICLE_BIOGENESIS	0.643396	0.154	0.65141	0.138
	273	Lib5	Tem_liver	LINOLEIC_ACID_METABOLISM	0.2996	0.158	0.342303	0.104
	274	Lib5	Tem_liver	GALACTOSE_METABOLISM	0.28962	0.163	0.197319	0.464
	275	Lib5	Tem_liver	GLYCOSYLPHOSPHATIDYLINOSITOL_GPI_ANCHOR_BIOSYNTHESIS	0.28259	0.167	0.356711	0.062
	276	Lib5	Tem_liver	PYRIMIDINE_METABOLISM	0.238459	0.167	0.126942	0.703
	277	Lib5	Tem_liver	GLUTAMINOLYSIS	0.358371	0.17	0.227325	0.469
	278	Lib5	Tem_liver	SELENOAMINO_ACID_METABOLISM	0.302742	0.177	0.172127	0.557
	279	Lib5	Tem_liver	PTM_GAMMA_CARBOXYLATION_HYPUSINE_FORMATION_AND_ARYLSULFATASE_ACTIVATION	0.383882	0.18	0.525888	0.037
	280	Lib5	Tem_liver	DRUG_METABOLISM_OTHER_ENZYMES	0.266253	0.184	0.211805	0.368
	281	Lib5	Tem_liver	SYNTHESIS_OF_PE	0.381115	0.188	0.0361516	0.938
	282	Lib5	Tem_liver	ACYL_CHAIN_REMODELLING_OF_PC_PE_PG_PS	0.272072	0.208	0.362002	0.051
	283	Lib5	Tem_liver	HIF_PATHWAY	0.419112	0.217	0.585346	0.046
	284	Lib5	Tem_liver	BILE_SALT_AND_ORGANIC_ANION_SLC_TRANSPORTERS	0.336625	0.232	0.483432	0.06
	285	Lib5	Tem_liver	PENTOSE_AND_GLUCURONATE_INTERCONVERSIONS	0.309817	0.234	0.311231	0.214
	286	Lib5	Tem_liver	TRANSPORT_OF_VITAMINS_NUCLEOSIDES_AND_RELATED_MOLECULES	0.266036	0.241	0.318006	0.08
	287	Lib5	Tem_liver	SULFUR_AMINO_ACID_METABOLISM	0.264843	0.243	0.207822	0.437
	288	Lib5	Tem_liver	ALPHA_LINOLENIC_ACID_METABOLISM	0.259543	0.244	0.272301	0.22
	289	Lib5	Tem_liver	SYNTHESIS_OF_PIPS_AT_THE_PLASMA_MEMBRANE	0.262337	0.245	0.180687	0.485
	290	Lib5	Tem_liver	GLYCEROPHOSPHOLIPID_BIOSYNTHESIS	0.19682	0.245	0.208756	0.211
	291	Lib5	Tem_liver	GLUCONEOGENESIS	0.234584	0.25	0.102376	0.799
	292	Lib5	Tem_liver	KERATAN_SULFATE_KERATIN_METABOLISM	0.26347	0.252	0.17786	0.552
	293	Lib5	Tem_liver	SPHINGOLIPID_METABOLISM	0.218799	0.256	0.178281	0.415
	294	Lib5	Tem_liver	PHENYLALANINE_METABOLISM	0.28074	0.273	0.332925	0.158
	295	Lib5	Tem_liver	ETHER_LIPID_METABOLISM	0.263596	0.274	0.290113	0.171
	296	Lib5	Tem_liver	REGULATION_OF_GLUCOKINASE_BY_GLUCOKINASE_REGULATORY_PROTEIN	0.53311	0.277	0.74859	0.053
	297	Lib5	Tem_liver	PURINE_METABOLISM	0.179402	0.278	0.0424037	0.982
	298	Lib5	Tem_liver	PAR1_PATHWAY	0.372027	0.282	0.519118	0.095
	299	Lib5	Tem_liver	GLUCOSE_METABOLISM	0.212961	0.286	0.133779	0.687
	300	Lib5	Tem_liver	CHREBP2_PATHWAY	0.389515	0.294	0.464872	0.173
	301	Lib5	Tem_liver	GLYCINE_SERINE_AND_THREONINE_METABOLISM	0.233613	0.295	0.126815	0.706
	302	Lib5	Tem_liver	LIMONENE_AND_PINENE_DEGRADATION	0.322191	0.318	0.284418	0.38
	303	Lib5	Tem_liver	SYNTHESIS_OF_PA	0.226689	0.356	0.466747	0.006
	304	Lib5	Tem_liver	RIBOFLAVIN_METABOLISM	0.277679	0.36	0.376909	0.149
	305	Lib5	Tem_liver	CHOLINE	0.243041	0.374	0.0362394	0.943
	306	Lib5	Tem_liver	PYRUVATE_to_ACETYL_coA	0.336052	0.378	0.369479	0.347
	307	Lib5	Tem_liver	ANDROGEN_BIOSYNTHESIS	0.312203	0.384	0.45556	0.176
	308	Lib5	Tem_liver	PRIMARY_BILE_ACID_BIOSYNTHESIS	0.239482	0.384	0.286603	0.272
	309	Lib5	Tem_liver	KETOLYSIS	0.343341	0.391	0.585329	0.082
	310	Lib5	Tem_liver	REGULATION_OF_HYPOXIA_INDUCIBLE_FACTOR_HIF_BY_OXYGEN	0.275691	0.397	0.429936	0.125
	311	Lib5	Tem_liver	O_GLYCAN_BIOSYNTHESIS	0.210152	0.398	0.244411	0.28
	312	Lib5	Tem_liver	SYNTHESIS_OF_PC	0.233658	0.414	0.140676	0.685
	313	Lib5	Tem_liver	O_LINKED_GLYCOSYLATION_OF_MUCINS	0.197548	0.42	0.294268	0.097
	314	Lib5	Tem_liver	KERATAN_SULFATE_DEGRADATION	0.321273	0.429	0.445745	0.243
	315	Lib5	Tem_liver	POLYAMINE_SYNTHESIS	0.319606	0.438	0.0640558	0.89
	316	Lib5	Tem_liver	ACTIVATION_OF_KAINATE_RECEPTORS_UPON_GLUTAMATE_BINDING	0.239787	0.44	0.503051	0.035
	317	Lib5	Tem_liver	GH_PATHWAY	0.267263	0.442	0.461818	0.119
	318	Lib5	Tem_liver	HYALURONAN_METABOLISM	0.236099	0.451	0.288444	0.333
	319	Lib5	Tem_liver	ION_CHANNEL_TRANSPORT	0.173125	0.457	0.108149	0.768
	320	Lib5	Tem_liver	GLYCEROPHOSPHOLIPID_METABOLISM	0.1646	0.463	0.274037	0.048
	321	Lib5	Tem_liver	BETA_ALANINE_METABOLISM	0.208945	0.468	0.287246	0.211
	322	Lib5	Tem_liver	PROPANOATE_METABOLISM	0.191098	0.469	0.247233	0.244
	323	Lib5	Tem_liver	GLYCOSPHINGOLIPID_METABOLISM	0.184463	0.489	0.284363	0.143
	324	Lib5	Tem_liver	PURINE_CATABOLISM	0.21378	0.49	0.215828	0.517
	325	Lib5	Tem_liver	KETOGENESIS	0.275005	0.491	0.603586	0.054
	326	Lib5	Tem_liver	REGULATION_OF_INSULIN_SECRETION_BY_ACETYLCHOLINE	0.273361	0.497	0.673321	0.021
	327	Lib5	Tem_liver	BUTANOATE_METABOLISM	0.176791	0.5	0.26693	0.168
	328	Lib5	Tem_liver	PYRUVATE_METABOLISM	0.16913	0.511	0.29524	0.068
	329	Lib5	Tem_liver	OXYGEN_DEPENDENT_PROLINE_HYDROXYLATION_OF_HYPOXIA_INDUCIBLE_FACTOR_ALPHA	0.260124	0.513	0.658843	0.023
	330	Lib5	Tem_liver	ASCORBATE_AND_ALDARATE_METABOLISM	0.210281	0.513	0.368733	0.141
	331	Lib5	Tem_liver	GLYCOGEN_BREAKDOWN_GLYCOGENOLYSIS	0.233163	0.514	0.679554	0.01
	332	Lib5	Tem_liver	PYRIMIDINE_CATABOLISM	0.207849	0.536	0.382106	0.158
	333	Lib5	Tem_liver	CHYLOMICRON_MEDIATED_LIPID_TRANSPORT	0.203045	0.536	0.254381	0.444
	334	Lib5	Tem_liver	FATTY_ACID_METABOLISM	0.160028	0.55	0.355672	0.031
	335	Lib5	Tem_liver	BILE_ACID_AND_BILE_SALT_METABOLISM	0.171327	0.56	0.276334	0.216
	336	Lib5	Tem_liver	LYSOSOME	0.15095	0.562	0.119648	0.724
	337	Lib5	Tem_liver	SYNTHESIS_OF_BILE_ACIDS_AND_BILE_SALTS	0.168754	0.564	0.3075	0.192
	338	Lib5	Tem_liver	BRANCHED_CHAIN_AMINO_ACID_CATABOLISM	0.192179	0.566	0.238081	0.361
	339	Lib5	Tem_liver	FATTY_ACID_ACTIVATION_UPTAKE	0.184587	0.567	0.263329	0.378
	340	Lib5	Tem_liver	METABOLISM_OF_LIPIDS_AND_LIPOPROTEINS	0.136262	0.568	0.148846	0.357
	341	Lib5	Tem_liver	NUCLEARRS_PATHWAY	0.190077	0.572	0.417544	0.112
	342	Lib5	Tem_liver	GLUTATHIONE_METABOLISM	0.148605	0.58	0.21027	0.316
	343	Lib5	Tem_liver	NICOTINATE_AND_NICOTINAMIDE_METABOLISM	0.161503	0.594	0.31517	0.127
	344	Lib5	Tem_liver	SYNTHESIS_OF_BILE_ACIDS_AND_BILE_SALTS_VIA_24_HYDROXYCHOLESTEROL	0.187429	0.604	0.480216	0.053
	345	Lib5	Tem_liver	MITOCHONDRIAL_FATTY_ACID_BETA_OXIDATION	0.168131	0.607	0.105859	0.778
	346	Lib5	Tem_liver	PURINE_SALVAGE	0.17219	0.619	0.328487	0.207
	347	Lib5	Tem_liver	PEROXISOME	0.14946	0.625	0.129713	0.705
	348	Lib5	Tem_liver	RETINOL_METABOLISM	0.144213	0.644	0.273639	0.142
	349	Lib5	Tem_liver	AMINE_COMPOUND_SLC_TRANSPORTERS	0.140713	0.663	0.186178	0.476
	350	Lib5	Tem_liver	BIOSYNTHESIS_OF_UNSATURATED_FATTY_ACIDS	0.141917	0.679	0.369533	0.088
	351	Lib5	Tem_liver	DIGESTION_OF_DIETARY_CARBOHYDRATE	0.201792	0.685	0.511967	0.167
	352	Lib5	Tem_liver	VALINE_LEUCINE_AND_ISOLEUCINE_DEGRADATION	0.126281	0.699	0.240468	0.234
	353	Lib5	Tem_liver	GLUCOSE_TRANSPORT	0.13798	0.701	0.436407	0.066
	354	Lib5	Tem_liver	ABC_TRANSPORTERS	0.125305	0.707	0.301633	0.062
	355	Lib5	Tem_liver	SULFUR_METABOLISM	0.141169	0.719	0.318506	0.281
	356	Lib5	Tem_liver	SYNTHESIS_OF_VERY_LONG_CHAIN_FATTY_ACYL_COAS	0.125315	0.73	0.270072	0.305
	357	Lib5	Tem_liver	LIPOPROTEIN_METABOLISM	0.130523	0.734	0.392125	0.089
	358	Lib5	Tem_liver	REGULATION_OF_WATER_BALANCE_BY_RENAL_AQUAPORINS	0.125499	0.734	0.315092	0.211
	359	Lib5	Tem_liver	CHONDROITIN_SULFATE_DERMATAN_SULFATE_METABOLISM	0.124747	0.739	0.146595	0.641
	360	Lib5	Tem_liver	TRIGLYCERIDE_BIOSYNTHESIS	0.11729	0.739	0.238688	0.242
	361	Lib5	Tem_liver	SYNTHESIS_OF_BILE_ACIDS_AND_BILE_SALTS_VIA_7ALPHA_HYDROXYCHOLESTEROL	0.126408	0.746	0.376647	0.095
	362	Lib5	Tem_liver	AMINO_ACID_SYNTHESIS_AND_INTERCONVERSION_TRANSAMINATION	0.127491	0.751	0.114552	0.747
	363	Lib5	Tem_liver	METAL_ION_SLC_TRANSPORTERS	0.117127	0.751	0.228602	0.36
	364	Lib5	Tem_liver	HEPARAN_SULFATE_HEPARIN_HS_GAG_METABOLISM	0.114368	0.756	0.148221	0.631
	365	Lib5	Tem_liver	TRYPTOPHAN_METABOLISM	0.119371	0.765	0.374842	0.014
	366	Lib5	Tem_liver	METABOLISM_OF_CARBOHYDRATES	0.111339	0.781	0.111929	0.771
	367	Lib5	Tem_liver	LIPID_DIGESTION_MOBILIZATION_AND_TRANSPORT	0.103512	0.784	0.310459	0.124
	368	Lib5	Tem_liver	VOLTAGE_GATED_POTASSIUM_CHANNELS	0.110231	0.785	0.210798	0.303
	369	Lib5	Tem_liver	HISTIDINE_METABOLISM	0.09839	0.803	0.464965	0.017
	370	Lib5	Tem_liver	NITROGEN_METABOLISM	0.100971	0.804	0.235234	0.33
	371	Lib5	Tem_liver	PEROXISOMAL_LIPID_METABOLISM	0.0954836	0.808	0.483576	0.002
	372	Lib5	Tem_liver	STARCH_AND_SUCROSE_METABOLISM	0.0926027	0.813	0.353792	0.021
	373	Lib5	Tem_liver	AQUAPORIN_MEDIATED_TRANSPORT	0.0979178	0.816	0.373036	0.073
	374	Lib5	Tem_liver	NITRIC_OXIDE_STIMULATES_GUANYLATE_CYCLASE	0.0999801	0.818	0.356647	0.062
	375	Lib5	Tem_liver	PROLINE_SYNTHESIS	0.0899137	0.841	0.175514	0.693
	376	Lib5	Tem_liver	METABOLISM_OF_STEROID_HORMONES_AND_VITAMINS_A_AND_D	0.0900925	0.848	0.31179	0.114
	377	Lib5	Tem_liver	ARGININE_AND_PROLINE_METABOLISM	0.0861952	0.848	0.184914	0.435
	378	Lib5	Tem_liver	TYROSINE_METABOLISM	0.0792077	0.851	0.289008	0.141
	379	Lib5	Tem_liver	TANDEM_PORE_DOMAIN_POTASSIUM_CHANNELS	0.08713	0.854	0.470082	0.054
	380	Lib5	Tem_liver	STEROID_BIOSYNTHESIS	0.0676216	0.875	0.467646	0.03
	381	Lib5	Tem_liver	PROLINE_DEGRADATION	0.071002	0.876	0.462852	0.291
	382	Lib5	Tem_liver	BETA_OXIDATION	0.0719653	0.883	0.374123	0.021
	383	Lib5	Tem_liver	FATTY_ACID_TRIACYLGLYCEROL_AND_KETONE_BODY_METABOLISM	0.0846472	0.886	0.225236	0.115
	384	Lib5	Tem_liver	DRUG_METABOLISM_CYTOCHROME_P450	0.0742608	0.886	0.186149	0.446
	385	Lib5	Tem_liver	TAURINE_AND_HYPOTAURINE_METABOLISM	0.068484	0.889	0.339908	0.216
	386	Lib5	Tem_liver	METABOLISM_OF_XENOBIOTICS_BY_CYTOCHROME_P450	0.0704698	0.893	0.238056	0.222
	387	Lib5	Tem_liver	STEROID_HORMONE_BIOSYNTHESIS	0.069718	0.898	0.348634	0.038
	388	Lib5	Tem_liver	GLYCOSAMINOGLYCAN_METABOLISM	0.0783625	0.917	0.0963524	0.844
	389	Lib5	Tem_liver	AMINO_ACID_AND_OLIGOPEPTIDE_SLC_TRANSPORTERS	0.0603238	0.918	0.200146	0.313
	390	Lib5	Tem_liver	OTHER_GLYCAN_DEGRADATION	0.0566289	0.92	0.164858	0.614
	391	Lib5	Tem_liver	TRANSPORT_OF_GLUCOSE_AND_OTHER_SUGARS_BILE_SALTS_AND_ORGANIC_ACIDS_METAL_IONS_AND_AMINE_COMPOUNDS	0.0600822	0.943	0.284221	0.016
	392	Lib5	Tem_liver	GLYCEROLIPID_METABOLISM	0.0553123	0.943	0.388464	0.004
	393	Lib5	Tem_liver	INTEGRATION_OF_ENERGY_METABOLISM	0.0518306	0.946	0.211055	0.303
	394	Lib5	Tem_liver	TRANSMEMBRANE_TRANSPORT_OF_SMALL_MOLECULES	0.0835333	0.967	0.189376	0.045
	395	Lib5	Tem_liver	ARACHIDONIC_ACID_METABOLISM	0.0405453	0.971	0.449954	0.001
	396	Lib5	Tem_liver	PPAR_SIGNALING_PATHWAY	0.0378834	0.971	0.288503	0.051
	397	Lib5	Tem_liver	TRYPTOPHAN_CATABOLISM	0.0109671	0.979	0.671033	0.005
	398	Lib5	Tem_liver	PASSIVE_TRANSPORT_BY_AQUAPORINS	0.00864362	0.981	0.545518	0.031
	399	Lib5	Tem_liver	POTASSIUM_CHANNELS	0.0257335	0.992	0.346427	0.001
	400	Lib5	Tem_liver	SLC_MEDIATED_TRANSMEMBRANE_TRANSPORT	0.048924	0.993	0.261472	0.001
	401	Lib5	Tem	PURINE_RIBONUCLEOSIDE_MONOPHOSPHATE_BIOSYNTHESIS	0.840067	0.001	0.105357	0.795
	402	Lib5	Tem	PENTOSE_PHOSPHATE	0.835347	0.001	0.0269014	0.954
	403	Lib5	Tem	SYNTHESIS_OF_DNA	0.828477	0.001	0.043029	0.949
	404	Lib5	Tem	METABOLISM_OF_RNA	0.828477	0.001	0.043029	0.951
	405	Lib5	Tem	METABOLISM_OF_MRNA	0.828477	0.001	0.043029	0.948
	406	Lib5	Tem	TRNA_AMINOACYLATION	0.827133	0.001	0.0337341	0.973
	407	Lib5	Tem	AMINOACYL_TRNA_BIOSYNTHESIS	0.811737	0.001	0.0359932	0.962
	408	Lib5	Tem	SYNTHESIS_OF_PIPS_AT_THE_LATE_ENDOSOME_MEMBRANE	0.802181	0.001	0.271298	0.489
	409	Lib5	Tem	REGULATION_OF_ORNITHINE_DECARBOXYLASE_ODC	0.757088	0.001	0.0387141	0.96
	410	Lib5	Tem	OXPHO_COMPLEX_V	0.715006	0.001	0.160611	0.654
	411	Lib5	Tem	TERPENOID_BACKBONE_BIOSYNTHESIS	0.705777	0.001	0.10771	0.78
	412	Lib5	Tem	OXPHO_COMPLEX_I	0.654826	0.001	0.0961948	0.804
	413	Lib5	Tem	SYNTHESIS_OF_SUBSTRATES_IN_N_GLYCAN_BIOSYTHESIS	0.645811	0.001	0.137615	0.706
	414	Lib5	Tem	RESPIRATORY_ELECTRON_TRANSPORT	0.625505	0.001	0.0441477	0.968
	415	Lib5	Tem	OXIDATIVE_PHOSPHORYLATION	0.61285	0.001	0.021936	0.997
	416	Lib5	Tem	IRON_UPTAKE_AND_TRANSPORT	0.590218	0.001	0.0610483	0.894
	417	Lib5	Tem	TCA_CYCLE_AND_RESPIRATORY_ELECTRON_TRANSPORT	0.551123	0.001	0.0239066	0.994
	418	Lib5	Tem	PORPHYRIN_AND_CHLOROPHYLL_METABOLISM	0.527221	0.001	0.0576035	0.924
	419	Lib5	Tem	PYRUVATE_METABOLISM_AND_CITRIC_ACID_TCA_CYCLE	0.506685	0.001	0.173503	0.52
	420	Lib5	Tem	GLYCOLYSIS	0.495932	0.001	0.107766	0.765
	421	Lib5	Tem	TCA_CYCLE	0.480988	0.001	0.0770788	0.867
	422	Lib5	Tem	ASPARAGINE_N_LINKED_GLYCOSYLATION	0.430116	0.001	0.0656742	0.922
	423	Lib5	Tem	INOSITOL_PHOSPHATE_METABOLISM	0.411787	0.001	0.209844	0.273
	424	Lib5	Tem	METABOLISM_OF_PROTEINS	0.337879	0.001	0.13664	0.601
	425	Lib5	Tem	VALINE_LEUCINE_AND_ISOLEUCINE_BIOSYNTHESIS	0.71908	0.001	0.0594814	0.9
	426	Lib5	Tem	LIPOGENESIS	0.406656	0.001	0.190576	0.404
	427	Lib5	Tem	N_GLYCAN_BIOSYNTHESIS	0.432812	0.002	0.128263	0.688
	428	Lib5	Tem	AMINO_SUGAR_AND_NUCLEOTIDE_SUGAR_METABOLISM	0.407436	0.002	0.169129	0.522
	429	Lib5	Tem	OXPHO_COMPLEX_II	0.857001	0.003	0.0291971	0.949
	430	Lib5	Tem	METABOLISM_OF_VITAMINS_AND_COFACTORS	0.393124	0.003	0.0850536	0.864
	431	Lib5	Tem	METABOLISM_OF_NUCLEOTIDES	0.367635	0.003	0.0578205	0.949
	432	Lib5	Tem	METABOLISM_OF_AMINO_ACIDS_AND_DERIVATIVES	0.277477	0.003	0.0671773	0.97
	433	Lib5	Tem	ADVANCED_GLYCOSYLATION_ENDPRODUCT_RECEPTOR_SIGNALING	0.956233	0.005	0.520697	0.371
	434	Lib5	Tem	SYNTHESIS_AND_INTERCONVERSION_OF_NUCLEOTIDE_DI_AND_TRIPHOSPHATES	0.570469	0.006	0.100466	0.815
	435	Lib5	Tem	METABOLISM_OF_PORPHYRINS	0.56119	0.007	0.0696739	0.893
	436	Lib5	Tem	OXPHO_COMPLEX_IV	0.522805	0.007	0.217685	0.433
	437	Lib5	Tem	TERMINATION_OF_O_GLYCAN_BIOSYNTHESIS	0.618419	0.012	0.252571	0.456
	438	Lib5	Tem	FRUCTOSE_AND_MANNOSE_METABOLISM	0.409758	0.012	0.182737	0.493
	439	Lib5	Tem	CERAMIDE_PATHWAY	0.709167	0.013	0.253911	0.53
	440	Lib5	Tem	GLYCOLYSIS_GLUCONEOGENESIS	0.331859	0.014	0.199248	0.33
	441	Lib5	Tem	REGULATION_OF_AUTOPHAGY	0.784559	0.015	0.444363	0.276
	442	Lib5	Tem	CHOLESTEROGENESIS	0.449624	0.016	0.284574	0.217
	443	Lib5	Tem	GOLGI_ASSOCIATED_VESICLE_BIOGENESIS	0.696775	0.021	0.366962	0.36
	444	Lib5	Tem	SYNTHESIS_OF_PIPS_AT_THE_GOLGI_MEMBRANE	0.473854	0.023	0.173228	0.631
	445	Lib5	Tem	VITAMIN_B5_PANTOTHENATE_METABOLISM	0.551857	0.025	0.133174	0.776
	446	Lib5	Tem	ONE_CARBON_POOL_BY_FOLATE	0.459048	0.027	0.0964044	0.832
	447	Lib5	Tem	POST_TRANSLATIONAL_MODIFICATION_SYNTHESIS_OF_GPI_ANCHORED_PROTEINS	0.39165	0.032	0.384909	0.04
	448	Lib5	Tem	GLUCONEOGENESIS	0.348061	0.036	0.150173	0.604
	449	Lib5	Tem	SGOCP_ALL	0.29419	0.043	0.110901	0.774
	450	Lib5	Tem	PGC1A_PATHWAY	0.749317	0.048	0.754561	0.056
	451	Lib5	Tem	LACTATE_GENERATION	0.742952	0.049	0.168711	0.737
	452	Lib5	Tem	REGULATION_OF_PYRUVATE_DEHYDROGENASE_PDH_COMPLEX	0.488564	0.058	0.369915	0.194
	453	Lib5	Tem	ALANINE_ASPARTATE_AND_GLUTAMATE_METABOLISM	0.333296	0.062	0.118286	0.728
	454	Lib5	Tem	ENDOCYTOSIS	0.674295	0.064	0.344792	0.431
	455	Lib5	Tem	REGULATION_OF_GLUCOKINASE_BY_GLUCOKINASE_REGULATORY_PROTEIN	0.729756	0.066	0.767164	0.025
	456	Lib5	Tem	GLUCOSE_METABOLISM	0.297137	0.07	0.0676357	0.923
	457	Lib5	Tem	LYSINE_DEGRADATION	0.341074	0.074	0.114723	0.773
	458	Lib5	Tem	SPHINGOLIPID_DE_NOVO_BIOSYNTHESIS	0.351446	0.076	0.164744	0.607
	459	Lib5	Tem	METABOLISM_OF_POLYAMINES	0.410856	0.078	0.146706	0.685
	460	Lib5	Tem	PROPANOATE_METABOLISM	0.31546	0.078	0.241591	0.261
	461	Lib5	Tem	SELENOAMINO_ACID_METABOLISM	0.364689	0.082	0.178624	0.562
	462	Lib5	Tem	SYNTHESIS_OF_PIPS_AT_THE_EARLY_ENDOSOME_MEMBRANE	0.48634	0.091	0.220736	0.535
	463	Lib5	Tem	PYRIMIDINE_METABOLISM	0.263784	0.095	0.146506	0.613
	464	Lib5	Tem	PHOSPHOLIPID_METABOLISM	0.203821	0.096	0.0937882	0.889
	465	Lib5	Tem	PANTOTHENATE_AND_COA_BIOSYNTHESIS	0.388104	0.1	0.345347	0.161
	466	Lib5	Tem	POLYAMINE_SYNTHESIS	0.553604	0.115	0.126149	0.783
	467	Lib5	Tem	SYNTHESIS_OF_PIPS_AT_THE_PLASMA_MEMBRANE	0.29654	0.119	0.196223	0.436
	468	Lib5	Tem	CHREBP2_PATHWAY	0.538302	0.122	0.434592	0.218
	469	Lib5	Tem	IONOTROPIC_ACTIVITY_OF_KAINATE_RECEPTORS	0.515978	0.122	0.529835	0.106
	470	Lib5	Tem	SULFUR_AMINO_ACID_METABOLISM	0.318991	0.13	0.0887211	0.847
	471	Lib5	Tem	GLYOXYLATE_AND_DICARBOXYLATE_METABOLISM	0.351943	0.137	0.205127	0.477
	472	Lib5	Tem	PYRUVATE_to_ACETYL_coA	0.522718	0.152	0.403216	0.285
	473	Lib5	Tem	OXPHO_COMPLEX_III	0.579359	0.162	0.040146	0.932
	474	Lib5	Tem	HIF_PATHWAY	0.44652	0.164	0.594021	0.038
	475	Lib5	Tem	ACTIVATION_OF_GENES_BY_ATF4	0.713037	0.166	0.868527	0.037
	476	Lib5	Tem	LYSOSOME_VESICLE_BIOGENESIS	0.616381	0.171	0.922946	0.001
	477	Lib5	Tem	GLUCURONIDATION	0.407384	0.173	0.213916	0.547
	478	Lib5	Tem	KERATAN_SULFATE_BIOSYNTHESIS	0.32837	0.173	0.230163	0.37
	479	Lib5	Tem	GLYCOSYLPHOSPHATIDYLINOSITOL_GPI_ANCHOR_BIOSYNTHESIS	0.291728	0.185	0.378438	0.032
	480	Lib5	Tem	ABACAVIR_TRANSPORT_AND_METABOLISM	0.366143	0.193	0.256855	0.422
	481	Lib5	Tem	ETHER_LIPID_METABOLISM	0.270999	0.203	0.192568	0.476
	482	Lib5	Tem	LIMONENE_AND_PINENE_DEGRADATION	0.374543	0.209	0.206005	0.533
	483	Lib5	Tem	GH_PATHWAY	0.37751	0.212	0.664804	0.006
	484	Lib5	Tem	RIBOFLAVIN_METABOLISM	0.359639	0.216	0.182086	0.621
	485	Lib5	Tem	CYSTEINE_AND_METHIONINE_METABOLISM	0.273197	0.216	0.183705	0.486
	486	Lib5	Tem	PTM_GAMMA_CARBOXYLATION_HYPUSINE_FORMATION_AND_ARYLSULFATASE_ACTIVATION	0.367373	0.217	0.390886	0.149
	487	Lib5	Tem	REGULATION_OF_HYPOXIA_INDUCIBLE_FACTOR_HIF_BY_OXYGEN	0.382195	0.225	0.356053	0.246
	488	Lib5	Tem	KERATAN_SULFATE_KERATIN_METABOLISM	0.278249	0.227	0.217614	0.41
	489	Lib5	Tem	PROLINE_SYNTHESIS	0.490381	0.228	0.125747	0.782
	490	Lib5	Tem	UNFOLDED_PROTEIN_RESPONSE	0.409258	0.237	0.332429	0.339
	491	Lib5	Tem	DRUG_METABOLISM_OTHER_ENZYMES	0.249236	0.251	0.232592	0.324
	492	Lib5	Tem	SPHINGOLIPID_METABOLISM	0.210194	0.252	0.128795	0.718
	493	Lib5	Tem	PENTOSE_AND_GLUCURONATE_INTERCONVERSIONS	0.301286	0.256	0.242202	0.393
	494	Lib5	Tem	ALDOSTERONE_REGULATED_SODIUM_REABSORPTION	0.254299	0.257	0.259413	0.251
	495	Lib5	Tem	BIOSYNTHESIS_OF_UNSATURATED_FATTY_ACIDS	0.283329	0.259	0.358568	0.113
	496	Lib5	Tem	AMINE_COMPOUND_SLC_TRANSPORTERS	0.248576	0.269	0.205173	0.38
	497	Lib5	Tem	SYNTHESIS_OF_PC	0.268846	0.282	0.191715	0.505
	498	Lib5	Tem	SYNTHESIS_OF_PE	0.312774	0.299	0.280306	0.407
	499	Lib5	Tem	OXYGEN_DEPENDENT_PROLINE_HYDROXYLATION_OF_HYPOXIA_INDUCIBLE_FACTOR_ALPHA	0.38488	0.302	0.672676	0.02
	500	Lib5	Tem	ETHANOL_OXIDATION	0.333517	0.306	0.561755	0.037
	501	Lib5	Tem	CHOLINE	0.268311	0.312	0.0313125	0.953
	502	Lib5	Tem	ALPHA_LINOLENIC_ACID_METABOLISM	0.229466	0.316	0.170162	0.538
	503	Lib5	Tem	O_GLYCAN_BIOSYNTHESIS	0.232088	0.322	0.263562	0.235
	504	Lib5	Tem	FOLATE_BIOSYNTHESIS	0.330682	0.329	0.46788	0.12
	505	Lib5	Tem	REGULATION_OF_INSULIN_SECRETION_BY_ACETYLCHOLINE	0.342523	0.348	0.836716	0.001
	506	Lib5	Tem	METABOLISM_OF_CARBOHYDRATES	0.162871	0.348	0.155672	0.433
	507	Lib5	Tem	PAR1_PATHWAY	0.3171	0.354	0.62885	0.026
	508	Lib5	Tem	KETOGENESIS	0.332343	0.369	0.744934	0.001
	509	Lib5	Tem	GLUTAMINOLYSIS	0.265066	0.38	0.106545	0.793
	510	Lib5	Tem	LINOLEIC_ACID_METABOLISM	0.229039	0.383	0.368101	0.074
	511	Lib5	Tem	SYNTHESIS_OF_VERY_LONG_CHAIN_FATTY_ACYL_COAS	0.251667	0.384	0.240953	0.419
	512	Lib5	Tem	METABOLISM_OF_LIPIDS_AND_LIPOPROTEINS	0.14754	0.384	0.146746	0.426
	513	Lib5	Tem	AMINO_ACID_SYNTHESIS_AND_INTERCONVERSION_TRANSAMINATION	0.249983	0.385	0.10656	0.797
	514	Lib5	Tem	O_LINKED_GLYCOSYLATION_OF_MUCINS	0.193687	0.393	0.271401	0.146
	515	Lib5	Tem	SYNTHESIS_OF_PA	0.218293	0.397	0.230297	0.355
	516	Lib5	Tem	GLUTATHIONE_METABOLISM	0.185381	0.41	0.144268	0.626
	517	Lib5	Tem	GLYCEROPHOSPHOLIPID_BIOSYNTHESIS	0.175082	0.41	0.151739	0.542
	518	Lib5	Tem	GALACTOSE_METABOLISM	0.210026	0.416	0.213052	0.386
	519	Lib5	Tem	ACTIVATION_OF_KAINATE_RECEPTORS_UPON_GLUTAMATE_BINDING	0.255285	0.428	0.623025	0.006
	520	Lib5	Tem	FATTY_ACID_ACTIVATION_UPTAKE	0.24665	0.429	0.33062	0.216
	521	Lib5	Tem	CHYLOMICRON_MEDIATED_LIPID_TRANSPORT	0.245439	0.43	0.392964	0.148
	522	Lib5	Tem	PURINE_METABOLISM	0.15761	0.439	0.0614907	0.971
	523	Lib5	Tem	ASCORBATE_AND_ALDARATE_METABOLISM	0.237885	0.446	0.188353	0.556
	524	Lib5	Tem	BILE_SALT_AND_ORGANIC_ANION_SLC_TRANSPORTERS	0.245816	0.448	0.499844	0.058
	525	Lib5	Tem	LYSOSOME	0.16981	0.451	0.160032	0.525
	526	Lib5	Tem	KETOLYSIS	0.299355	0.459	0.885144	0.001
	527	Lib5	Tem	KERATAN_SULFATE_DEGRADATION	0.303495	0.462	0.540646	0.118
	528	Lib5	Tem	CHONDROITIN_SULFATE_DERMATAN_SULFATE_METABOLISM	0.182791	0.465	0.193342	0.476
	529	Lib5	Tem	METAL_ION_SLC_TRANSPORTERS	0.199329	0.471	0.256932	0.29
	530	Lib5	Tem	GLYCOGEN_BREAKDOWN_GLYCOGENOLYSIS	0.252509	0.472	0.534157	0.042
	531	Lib5	Tem	TANDEM_PORE_DOMAIN_POTASSIUM_CHANNELS	0.223146	0.503	0.460441	0.064
	532	Lib5	Tem	BUTANOATE_METABOLISM	0.1846	0.507	0.316446	0.076
	533	Lib5	Tem	DIGESTION_OF_DIETARY_CARBOHYDRATE	0.263525	0.515	0.411216	0.29
	534	Lib5	Tem	SULFUR_METABOLISM	0.219415	0.522	0.263602	0.416
	535	Lib5	Tem	TRYPTOPHAN_METABOLISM	0.170621	0.53	0.292843	0.091
	536	Lib5	Tem	VALINE_LEUCINE_AND_ISOLEUCINE_DEGRADATION	0.160378	0.531	0.217156	0.306
	537	Lib5	Tem	ANDROGEN_BIOSYNTHESIS	0.25029	0.535	0.653279	0.026
	538	Lib5	Tem	HYALURONAN_METABOLISM	0.199435	0.539	0.430459	0.087
	539	Lib5	Tem	TRANSPORT_OF_VITAMINS_NUCLEOSIDES_AND_RELATED_MOLECULES	0.166914	0.54	0.26499	0.204
	540	Lib5	Tem	PYRUVATE_METABOLISM	0.158031	0.54	0.2759	0.086
	541	Lib5	Tem	FATTY_ACID_TRIACYLGLYCEROL_AND_KETONE_BODY_METABOLISM	0.148813	0.543	0.214467	0.151
	542	Lib5	Tem	ACYL_CHAIN_REMODELLING_OF_PC_PE_PG_PS	0.171126	0.551	0.241088	0.295
	543	Lib5	Tem	GLYCEROPHOSPHOLIPID_METABOLISM	0.147605	0.561	0.150843	0.549
	544	Lib5	Tem	SYNTHESIS_OF_BILE_ACIDS_AND_BILE_SALTS_VIA_24_HYDROXYCHOLESTEROL	0.210706	0.565	0.506055	0.043
	545	Lib5	Tem	NUCLEARRS_PATHWAY	0.19287	0.583	0.36453	0.176
	546	Lib5	Tem	TRIGLYCERIDE_BIOSYNTHESIS	0.157939	0.585	0.277668	0.134
	547	Lib5	Tem	PURINE_CATABOLISM	0.191076	0.59	0.219022	0.506
	548	Lib5	Tem	NICOTINATE_AND_NICOTINAMIDE_METABOLISM	0.161543	0.592	0.339727	0.081
	549	Lib5	Tem	HISTIDINE_METABOLISM	0.168559	0.605	0.306622	0.191
	550	Lib5	Tem	GLUCOSE_TRANSPORT	0.169817	0.609	0.446536	0.052
	551	Lib5	Tem	TRANSPORT_OF_GLUCOSE_AND_OTHER_SUGARS_BILE_SALTS_AND_ORGANIC_ACIDS_METAL_IONS_AND_AMINE_COMPOUNDS	0.14203	0.612	0.23387	0.086
	552	Lib5	Tem	PYRIMIDINE_CATABOLISM	0.172662	0.618	0.577636	0.011
	553	Lib5	Tem	PRIMARY_BILE_ACID_BIOSYNTHESIS	0.158746	0.634	0.325037	0.194
	554	Lib5	Tem	FATTY_ACID_METABOLISM	0.14008	0.643	0.244182	0.234
	555	Lib5	Tem	PHENYLALANINE_METABOLISM	0.153709	0.658	0.203289	0.504
	556	Lib5	Tem	BETA_OXIDATION	0.132665	0.667	0.326182	0.068
	557	Lib5	Tem	PURINE_SALVAGE	0.158072	0.674	0.377599	0.142
	558	Lib5	Tem	BETA_ALANINE_METABOLISM	0.141954	0.677	0.327238	0.114
	559	Lib5	Tem	PEROXISOME	0.124077	0.677	0.135433	0.678
	560	Lib5	Tem	BRANCHED_CHAIN_AMINO_ACID_CATABOLISM	0.148265	0.687	0.307387	0.204
	561	Lib5	Tem	OTHER_GLYCAN_DEGRADATION	0.148162	0.697	0.159072	0.625
	562	Lib5	Tem	SYNTHESIS_OF_BILE_ACIDS_AND_BILE_SALTS_VIA_7ALPHA_HYDROXYCHOLESTEROL	0.126112	0.698	0.417991	0.065
	563	Lib5	Tem	REGULATION_OF_WATER_BALANCE_BY_RENAL_AQUAPORINS	0.139756	0.7	0.312951	0.213
	564	Lib5	Tem	PROLINE_DEGRADATION	0.171865	0.717	0.26215	0.571
	565	Lib5	Tem	NITROGEN_METABOLISM	0.12174	0.724	0.186685	0.517
	566	Lib5	Tem	LIPOPROTEIN_METABOLISM	0.135354	0.725	0.43533	0.041
	567	Lib5	Tem	GLYCOSPHINGOLIPID_METABOLISM	0.115284	0.732	0.177421	0.513
	568	Lib5	Tem	TAURINE_AND_HYPOTAURINE_METABOLISM	0.126662	0.748	0.353411	0.211
	569	Lib5	Tem	ABC_TRANSPORTERS	0.120169	0.755	0.287905	0.091
	570	Lib5	Tem	ION_CHANNEL_TRANSPORT	0.113527	0.758	0.0943608	0.832
	571	Lib5	Tem	AMINO_ACID_AND_OLIGOPEPTIDE_SLC_TRANSPORTERS	0.1087	0.762	0.218075	0.247
	572	Lib5	Tem	SYNTHESIS_OF_BILE_ACIDS_AND_BILE_SALTS	0.111753	0.764	0.339168	0.11
	573	Lib5	Tem	GLYCINE_SERINE_AND_THREONINE_METABOLISM	0.10211	0.777	0.219949	0.319
	574	Lib5	Tem	MITOCHONDRIAL_FATTY_ACID_BETA_OXIDATION	0.117741	0.788	0.078229	0.859
	575	Lib5	Tem	AQUAPORIN_MEDIATED_TRANSPORT	0.104899	0.794	0.249831	0.325
	576	Lib5	Tem	TYROSINE_METABOLISM	0.0944411	0.794	0.183445	0.476
	577	Lib5	Tem	BILE_ACID_AND_BILE_SALT_METABOLISM	0.101207	0.796	0.350881	0.071
	578	Lib5	Tem	LIPID_DIGESTION_MOBILIZATION_AND_TRANSPORT	0.0951645	0.817	0.406228	0.015
	579	Lib5	Tem	HEPARAN_SULFATE_HEPARIN_HS_GAG_METABOLISM	0.0953936	0.824	0.165352	0.553
	580	Lib5	Tem	PEROXISOMAL_LIPID_METABOLISM	0.0902002	0.83	0.475494	0.014
	581	Lib5	Tem	METABOLISM_OF_XENOBIOTICS_BY_CYTOCHROME_P450	0.088915	0.833	0.257873	0.165
	582	Lib5	Tem	STARCH_AND_SUCROSE_METABOLISM	0.0924467	0.834	0.319961	0.042
	583	Lib5	Tem	GLYCOSAMINOGLYCAN_METABOLISM	0.0958045	0.838	0.207387	0.202
	584	Lib5	Tem	NITRIC_OXIDE_STIMULATES_GUANYLATE_CYCLASE	0.0861218	0.838	0.41902	0.021
	585	Lib5	Tem	STEROID_BIOSYNTHESIS	0.0871821	0.855	0.532031	0.01
	586	Lib5	Tem	INTEGRATION_OF_ENERGY_METABOLISM	0.0803862	0.866	0.177535	0.464
	587	Lib5	Tem	ARGININE_AND_PROLINE_METABOLISM	0.0851398	0.868	0.115066	0.781
	588	Lib5	Tem	STEROID_HORMONE_BIOSYNTHESIS	0.077776	0.873	0.31722	0.075
	589	Lib5	Tem	METABOLISM_OF_STEROID_HORMONES_AND_VITAMINS_A_AND_D	0.0773944	0.887	0.396351	0.028
	590	Lib5	Tem	RETINOL_METABOLISM	0.0716864	0.888	0.273821	0.114
	591	Lib5	Tem	DRUG_METABOLISM_CYTOCHROME_P450	0.0594455	0.917	0.181644	0.468
	592	Lib5	Tem	VOLTAGE_GATED_POTASSIUM_CHANNELS	0.0588424	0.918	0.209499	0.285
	593	Lib5	Tem	GLYCEROLIPID_METABOLISM	0.0557371	0.926	0.355594	0.01
	594	Lib5	Tem	TRYPTOPHAN_CATABOLISM	0.0398804	0.931	0.641454	0.008
	595	Lib5	Tem	PPAR_SIGNALING_PATHWAY	0.0589187	0.934	0.330938	0.01
	596	Lib5	Tem	TRANSMEMBRANE_TRANSPORT_OF_SMALL_MOLECULES	0.0888675	0.935	0.165987	0.221
	597	Lib5	Tem	ARACHIDONIC_ACID_METABOLISM	0.0477977	0.942	0.31525	0.036
	598	Lib5	Tem	PASSIVE_TRANSPORT_BY_AQUAPORINS	0.00930851	0.983	0.370524	0.185
	599	Lib5	Tem	SLC_MEDIATED_TRANSMEMBRANE_TRANSPORT	0.0631754	0.987	0.2335	0.008
	600	Lib5	Tem	POTASSIUM_CHANNELS	0.0262924	0.996	0.302881	0.012
	601	Lib5	Trm_gut	ADVANCED_GLYCOSYLATION_ENDPRODUCT_RECEPTOR_SIGNALING	0.978289	0.001	0.664393	0.237
	602	Lib5	Trm_gut	PURINE_RIBONUCLEOSIDE_MONOPHOSPHATE_BIOSYNTHESIS	0.779227	0.001	0.184796	0.569
	603	Lib5	Trm_gut	TRNA_AMINOACYLATION	0.753289	0.001	0.0320413	0.975
	604	Lib5	Trm_gut	AMINOACYL_TRNA_BIOSYNTHESIS	0.748848	0.001	0.0331937	0.97
	605	Lib5	Trm_gut	GH_PATHWAY	0.742221	0.001	0.194649	0.614
	606	Lib5	Trm_gut	SYNTHESIS_OF_DNA	0.708699	0.001	0.049995	0.936
	607	Lib5	Trm_gut	METABOLISM_OF_MRNA	0.708699	0.001	0.049995	0.928
	608	Lib5	Trm_gut	METABOLISM_OF_RNA	0.708699	0.001	0.049995	0.924
	609	Lib5	Trm_gut	TERPENOID_BACKBONE_BIOSYNTHESIS	0.646191	0.001	0.117613	0.778
	610	Lib5	Trm_gut	REGULATION_OF_ORNITHINE_DECARBOXYLASE_ODC	0.629147	0.001	0.0431236	0.943
	611	Lib5	Trm_gut	PORPHYRIN_AND_CHLOROPHYLL_METABOLISM	0.568142	0.001	0.0638072	0.905
	612	Lib5	Trm_gut	POST_TRANSLATIONAL_MODIFICATION_SYNTHESIS_OF_GPI_ANCHORED_PROTEINS	0.564346	0.001	0.19473	0.482
	613	Lib5	Trm_gut	RESPIRATORY_ELECTRON_TRANSPORT	0.556489	0.001	0.0541106	0.951
	614	Lib5	Trm_gut	OXPHO_COMPLEX_I	0.553576	0.001	0.116136	0.747
	615	Lib5	Trm_gut	OXIDATIVE_PHOSPHORYLATION	0.516792	0.001	0.0306843	0.991
	616	Lib5	Trm_gut	IRON_UPTAKE_AND_TRANSPORT	0.510079	0.001	0.145351	0.657
	617	Lib5	Trm_gut	N_GLYCAN_BIOSYNTHESIS	0.48293	0.001	0.0673246	0.912
	618	Lib5	Trm_gut	TCA_CYCLE_AND_RESPIRATORY_ELECTRON_TRANSPORT	0.449828	0.001	0.0332733	0.994
	619	Lib5	Trm_gut	ASPARAGINE_N_LINKED_GLYCOSYLATION	0.449528	0.001	0.0524537	0.934
	620	Lib5	Trm_gut	METABOLISM_OF_PROTEINS	0.301123	0.001	0.0675179	0.967
	621	Lib5	Trm_gut	METABOLISM_OF_AMINO_ACIDS_AND_DERIVATIVES	0.281302	0.001	0.0919001	0.886
	622	Lib5	Trm_gut	PYRUVATE_METABOLISM_AND_CITRIC_ACID_TCA_CYCLE	0.422326	0.002	0.0935679	0.823
	623	Lib5	Trm_gut	METABOLISM_OF_VITAMINS_AND_COFACTORS	0.377785	0.002	0.157574	0.567
	624	Lib5	Trm_gut	PENTOSE_PHOSPHATE	0.698555	0.003	0.0827886	0.841
	625	Lib5	Trm_gut	TCA_CYCLE	0.451814	0.003	0.00681682	0.997
	626	Lib5	Trm_gut	OXPHO_COMPLEX_II	0.847379	0.006	0.00630392	0.994
	627	Lib5	Trm_gut	GLYCOSYLPHOSPHATIDYLINOSITOL_GPI_ANCHOR_BIOSYNTHESIS	0.457537	0.006	0.199248	0.427
	628	Lib5	Trm_gut	SYNTHESIS_OF_SUBSTRATES_IN_N_GLYCAN_BIOSYTHESIS	0.534026	0.009	0.112532	0.771
	629	Lib5	Trm_gut	PAR1_PATHWAY	0.676425	0.01	0.235988	0.521
	630	Lib5	Trm_gut	METABOLISM_OF_PORPHYRINS	0.546859	0.01	0.05807	0.921
	631	Lib5	Trm_gut	OXPHO_COMPLEX_III	0.776987	0.012	0.209514	0.659
	632	Lib5	Trm_gut	GOLGI_ASSOCIATED_VESICLE_BIOGENESIS	0.735235	0.012	0.442483	0.223
	633	Lib5	Trm_gut	GALACTOSE_METABOLISM	0.42478	0.012	0.176184	0.564
	634	Lib5	Trm_gut	CHOLESTEROGENESIS	0.459896	0.014	0.128628	0.713
	635	Lib5	Trm_gut	VITAMIN_B5_PANTOTHENATE_METABOLISM	0.545864	0.017	0.034586	0.942
	636	Lib5	Trm_gut	SELENOAMINO_ACID_METABOLISM	0.432427	0.027	0.168039	0.578
	637	Lib5	Trm_gut	CYSTEINE_AND_METHIONINE_METABOLISM	0.387371	0.027	0.171528	0.533
	638	Lib5	Trm_gut	METABOLISM_OF_NUCLEOTIDES	0.281251	0.03	0.178276	0.407
	639	Lib5	Trm_gut	OXPHO_COMPLEX_IV	0.449801	0.031	0.15046	0.663
	640	Lib5	Trm_gut	METABOLISM_OF_POLYAMINES	0.486839	0.035	0.307743	0.262
	641	Lib5	Trm_gut	PROPANOATE_METABOLISM	0.361901	0.036	0.107337	0.775
	642	Lib5	Trm_gut	SYNTHESIS_OF_PIPS_AT_THE_LATE_ENDOSOME_MEMBRANE	0.628223	0.038	0.318452	0.398
	643	Lib5	Trm_gut	VALINE_LEUCINE_AND_ISOLEUCINE_BIOSYNTHESIS	0.50404	0.038	0.0103093	0.979
	644	Lib5	Trm_gut	SYNTHESIS_AND_INTERCONVERSION_OF_NUCLEOTIDE_DI_AND_TRIPHOSPHATES	0.416307	0.045	0.280577	0.289
	645	Lib5	Trm_gut	SGOCP_ALL	0.280897	0.045	0.116082	0.747
	646	Lib5	Trm_gut	GLYOXYLATE_AND_DICARBOXYLATE_METABOLISM	0.4175	0.046	0.192532	0.548
	647	Lib5	Trm_gut	AMINO_SUGAR_AND_NUCLEOTIDE_SUGAR_METABOLISM	0.311454	0.046	0.169072	0.487
	648	Lib5	Trm_gut	LYSINE_DEGRADATION	0.383818	0.05	0.160848	0.602
	649	Lib5	Trm_gut	PANTOTHENATE_AND_COA_BIOSYNTHESIS	0.417259	0.06	0.373139	0.112
	650	Lib5	Trm_gut	PENTOSE_AND_GLUCURONATE_INTERCONVERSIONS	0.408813	0.064	0.229463	0.451
	651	Lib5	Trm_gut	REGULATION_OF_AUTOPHAGY	0.652352	0.07	0.697136	0.055
	652	Lib5	Trm_gut	ALDOSTERONE_REGULATED_SODIUM_REABSORPTION	0.359616	0.07	0.175419	0.564
	653	Lib5	Trm_gut	BIOSYNTHESIS_OF_UNSATURATED_FATTY_ACIDS	0.37696	0.072	0.16558	0.597
	654	Lib5	Trm_gut	FOLATE_BIOSYNTHESIS	0.500679	0.084	0.352409	0.274
	655	Lib5	Trm_gut	OXPHO_COMPLEX_V	0.448372	0.086	0.20008	0.559
	656	Lib5	Trm_gut	SYNTHESIS_OF_PIPS_AT_THE_GOLGI_MEMBRANE	0.374617	0.089	0.321321	0.203
	657	Lib5	Trm_gut	ENDOCYTOSIS	0.632235	0.092	0.574594	0.131
	658	Lib5	Trm_gut	PGC1A_PATHWAY	0.688798	0.095	0.644948	0.146
	659	Lib5	Trm_gut	PTM_GAMMA_CARBOXYLATION_HYPUSINE_FORMATION_AND_ARYLSULFATASE_ACTIVATION	0.445286	0.1	0.209595	0.54
	660	Lib5	Trm_gut	NUCLEARRS_PATHWAY	0.421135	0.1	0.275153	0.34
	661	Lib5	Trm_gut	ALANINE_ASPARTATE_AND_GLUTAMATE_METABOLISM	0.304508	0.1	0.238309	0.296
	662	Lib5	Trm_gut	MITOCHONDRIAL_FATTY_ACID_BETA_OXIDATION	0.38768	0.102	0.178707	0.574
	663	Lib5	Trm_gut	INOSITOL_PHOSPHATE_METABOLISM	0.260932	0.103	0.292849	0.043
	664	Lib5	Trm_gut	CERAMIDE_PATHWAY	0.524058	0.114	0.365124	0.334
	665	Lib5	Trm_gut	LYSOSOME_VESICLE_BIOGENESIS	0.684557	0.117	0.707463	0.089
	666	Lib5	Trm_gut	KERATAN_SULFATE_BIOSYNTHESIS	0.350929	0.122	0.127412	0.714
	667	Lib5	Trm_gut	BETA_ALANINE_METABOLISM	0.326622	0.122	0.36379	0.061
	668	Lib5	Trm_gut	GLUCURONIDATION	0.443195	0.125	0.205304	0.576
	669	Lib5	Trm_gut	TRYPTOPHAN_CATABOLISM	0.423557	0.127	0.136258	0.765
	670	Lib5	Trm_gut	VALINE_LEUCINE_AND_ISOLEUCINE_DEGRADATION	0.274301	0.128	0.212395	0.31
	671	Lib5	Trm_gut	LYSOSOME	0.244405	0.132	0.0961241	0.836
	672	Lib5	Trm_gut	BRANCHED_CHAIN_AMINO_ACID_CATABOLISM	0.340591	0.134	0.262611	0.325
	673	Lib5	Trm_gut	LIMONENE_AND_PINENE_DEGRADATION	0.414886	0.142	0.408393	0.153
	674	Lib5	Trm_gut	ONE_CARBON_POOL_BY_FOLATE	0.352106	0.144	0.209626	0.461
	675	Lib5	Trm_gut	KERATAN_SULFATE_KERATIN_METABOLISM	0.315886	0.146	0.118801	0.74
	676	Lib5	Trm_gut	HIF_PATHWAY	0.447134	0.164	0.353015	0.277
	677	Lib5	Trm_gut	UNFOLDED_PROTEIN_RESPONSE	0.431593	0.171	0.310495	0.367
	678	Lib5	Trm_gut	SYNTHESIS_OF_PE	0.381716	0.177	0.186699	0.604
	679	Lib5	Trm_gut	FRUCTOSE_AND_MANNOSE_METABOLISM	0.264195	0.182	0.324115	0.062
	680	Lib5	Trm_gut	SYNTHESIS_OF_PIPS_AT_THE_EARLY_ENDOSOME_MEMBRANE	0.407546	0.186	0.262113	0.439
	681	Lib5	Trm_gut	NICOTINATE_AND_NICOTINAMIDE_METABOLISM	0.28132	0.188	0.229189	0.35
	682	Lib5	Trm_gut	POLYAMINE_SYNTHESIS	0.47912	0.192	0.315998	0.426
	683	Lib5	Trm_gut	CHREBP2_PATHWAY	0.424269	0.201	0.603905	0.051
	684	Lib5	Trm_gut	REGULATION_OF_PYRUVATE_DEHYDROGENASE_PDH_COMPLEX	0.352614	0.203	0.237979	0.447
	685	Lib5	Trm_gut	SULFUR_METABOLISM	0.355246	0.207	0.346217	0.232
	686	Lib5	Trm_gut	DIGESTION_OF_DIETARY_CARBOHYDRATE	0.485253	0.209	0.14006	0.746
	687	Lib5	Trm_gut	KERATAN_SULFATE_DEGRADATION	0.473123	0.21	0.426321	0.237
	688	Lib5	Trm_gut	STARCH_AND_SUCROSE_METABOLISM	0.244348	0.22	0.353217	0.025
	689	Lib5	Trm_gut	GLUTAMINOLYSIS	0.335645	0.231	0.212829	0.508
	690	Lib5	Trm_gut	VOLTAGE_GATED_POTASSIUM_CHANNELS	0.22674	0.232	0.181058	0.462
	691	Lib5	Trm_gut	GLUCOSE_METABOLISM	0.223638	0.238	0.236531	0.212
	692	Lib5	Trm_gut	SPHINGOLIPID_DE_NOVO_BIOSYNTHESIS	0.275286	0.24	0.331098	0.1
	693	Lib5	Trm_gut	SYNTHESIS_OF_PIPS_AT_THE_PLASMA_MEMBRANE	0.260512	0.241	0.290956	0.136
	694	Lib5	Trm_gut	ABACAVIR_TRANSPORT_AND_METABOLISM	0.34226	0.263	0.548777	0.022
	695	Lib5	Trm_gut	LIPOGENESIS	0.228965	0.271	0.110538	0.748
	696	Lib5	Trm_gut	REGULATION_OF_HYPOXIA_INDUCIBLE_FACTOR_HIF_BY_OXYGEN	0.34873	0.272	0.270694	0.42
	697	Lib5	Trm_gut	OXYGEN_DEPENDENT_PROLINE_HYDROXYLATION_OF_HYPOXIA_INDUCIBLE_FACTOR_ALPHA	0.388733	0.282	0.416672	0.23
	698	Lib5	Trm_gut	REGULATION_OF_GLUCOKINASE_BY_GLUCOKINASE_REGULATORY_PROTEIN	0.500414	0.285	0.692023	0.108
	699	Lib5	Trm_gut	TRANSPORT_OF_VITAMINS_NUCLEOSIDES_AND_RELATED_MOLECULES	0.251934	0.287	0.224895	0.349
	700	Lib5	Trm_gut	PHOSPHOLIPID_METABOLISM	0.170453	0.289	0.166989	0.312
	701	Lib5	Trm_gut	TRYPTOPHAN_METABOLISM	0.217754	0.292	0.219083	0.314
	702	Lib5	Trm_gut	GLYCOLYSIS_GLUCONEOGENESIS	0.211465	0.295	0.195499	0.355
	703	Lib5	Trm_gut	REGULATION_OF_WATER_BALANCE_BY_RENAL_AQUAPORINS	0.277481	0.297	0.237535	0.421
	704	Lib5	Trm_gut	ANDROGEN_BIOSYNTHESIS	0.364903	0.3	0.448536	0.2
	705	Lib5	Trm_gut	LIPOPROTEIN_METABOLISM	0.275734	0.306	0.434337	0.053
	706	Lib5	Trm_gut	ASCORBATE_AND_ALDARATE_METABOLISM	0.293451	0.312	0.239528	0.464
	707	Lib5	Trm_gut	GLYCEROPHOSPHOLIPID_METABOLISM	0.192258	0.317	0.24001	0.105
	708	Lib5	Trm_gut	GLYCOLYSIS	0.224166	0.32	0.287605	0.123
	709	Lib5	Trm_gut	SYNTHESIS_OF_PC	0.256955	0.322	0.100596	0.785
	710	Lib5	Trm_gut	TERMINATION_OF_O_GLYCAN_BIOSYNTHESIS	0.331951	0.323	0.317305	0.35
	711	Lib5	Trm_gut	ACTIVATION_OF_GENES_BY_ATF4	0.547714	0.331	0.81949	0.071
	712	Lib5	Trm_gut	IONOTROPIC_ACTIVITY_OF_KAINATE_RECEPTORS	0.348775	0.331	0.482137	0.162
	713	Lib5	Trm_gut	FATTY_ACID_TRIACYLGLYCEROL_AND_KETONE_BODY_METABOLISM	0.18276	0.342	0.160049	0.459
	714	Lib5	Trm_gut	PYRUVATE_to_ACETYL_coA	0.346213	0.343	0.0205775	0.97
	715	Lib5	Trm_gut	KETOLYSIS	0.357598	0.345	0.630392	0.058
	716	Lib5	Trm_gut	GLYCOGEN_BREAKDOWN_GLYCOGENOLYSIS	0.313111	0.35	0.740727	0.001
	717	Lib5	Trm_gut	ALPHA_LINOLENIC_ACID_METABOLISM	0.223843	0.353	0.249405	0.286
	718	Lib5	Trm_gut	KETOGENESIS	0.326802	0.368	0.452197	0.188
	719	Lib5	Trm_gut	FATTY_ACID_METABOLISM	0.210204	0.371	0.282841	0.125
	720	Lib5	Trm_gut	TRIGLYCERIDE_BIOSYNTHESIS	0.204111	0.375	0.225209	0.293
	721	Lib5	Trm_gut	PYRUVATE_METABOLISM	0.18973	0.397	0.312878	0.042
	722	Lib5	Trm_gut	ABC_TRANSPORTERS	0.188614	0.399	0.305083	0.054
	723	Lib5	Trm_gut	METABOLISM_OF_CARBOHYDRATES	0.15739	0.402	0.120633	0.719
	724	Lib5	Trm_gut	LACTATE_GENERATION	0.401407	0.404	0.2004	0.676
	725	Lib5	Trm_gut	PURINE_METABOLISM	0.161321	0.413	0.181831	0.264
	726	Lib5	Trm_gut	HYALURONAN_METABOLISM	0.249719	0.419	0.37049	0.16
	727	Lib5	Trm_gut	PURINE_SALVAGE	0.253174	0.423	0.381343	0.136
	728	Lib5	Trm_gut	BILE_SALT_AND_ORGANIC_ANION_SLC_TRANSPORTERS	0.250169	0.424	0.632629	0.013
	729	Lib5	Trm_gut	SULFUR_AMINO_ACID_METABOLISM	0.219721	0.428	0.223131	0.376
	730	Lib5	Trm_gut	STEROID_BIOSYNTHESIS	0.212658	0.455	0.202121	0.52
	731	Lib5	Trm_gut	SPHINGOLIPID_METABOLISM	0.166926	0.457	0.271761	0.075
	732	Lib5	Trm_gut	CHYLOMICRON_MEDIATED_LIPID_TRANSPORT	0.230411	0.459	0.465794	0.071
	733	Lib5	Trm_gut	GLUCONEOGENESIS	0.179498	0.464	0.221638	0.327
	734	Lib5	Trm_gut	REGULATION_OF_INSULIN_SECRETION_BY_ACETYLCHOLINE	0.263806	0.499	0.633675	0.041
	735	Lib5	Trm_gut	ETHER_LIPID_METABOLISM	0.185912	0.506	0.208452	0.422
	736	Lib5	Trm_gut	PHENYLALANINE_METABOLISM	0.198633	0.507	0.34414	0.146
	737	Lib5	Trm_gut	METAL_ION_SLC_TRANSPORTERS	0.178509	0.524	0.115184	0.76
	738	Lib5	Trm_gut	PURINE_CATABOLISM	0.224094	0.525	0.526606	0.035
	739	Lib5	Trm_gut	PYRIMIDINE_CATABOLISM	0.220639	0.525	0.456478	0.064
	740	Lib5	Trm_gut	BUTANOATE_METABOLISM	0.171066	0.53	0.286154	0.147
	741	Lib5	Trm_gut	LIPID_DIGESTION_MOBILIZATION_AND_TRANSPORT	0.169786	0.539	0.314938	0.093
	742	Lib5	Trm_gut	SYNTHESIS_OF_VERY_LONG_CHAIN_FATTY_ACYL_COAS	0.195521	0.551	0.316244	0.224
	743	Lib5	Trm_gut	RIBOFLAVIN_METABOLISM	0.191424	0.557	0.399455	0.121
	744	Lib5	Trm_gut	GLYCEROPHOSPHOLIPID_BIOSYNTHESIS	0.147225	0.557	0.19108	0.295
	745	Lib5	Trm_gut	SYNTHESIS_OF_BILE_ACIDS_AND_BILE_SALTS_VIA_24_HYDROXYCHOLESTEROL	0.204872	0.576	0.379884	0.183
	746	Lib5	Trm_gut	ACTIVATION_OF_KAINATE_RECEPTORS_UPON_GLUTAMATE_BINDING	0.192174	0.582	0.487681	0.059
	747	Lib5	Trm_gut	GLUCOSE_TRANSPORT	0.172949	0.587	0.302777	0.255
	748	Lib5	Trm_gut	ETHANOL_OXIDATION	0.195556	0.616	0.35519	0.296
	749	Lib5	Trm_gut	O_GLYCAN_BIOSYNTHESIS	0.153141	0.616	0.31212	0.111
	750	Lib5	Trm_gut	BILE_ACID_AND_BILE_SALT_METABOLISM	0.156292	0.64	0.166724	0.56
	751	Lib5	Trm_gut	GLYCINE_SERINE_AND_THREONINE_METABOLISM	0.139351	0.64	0.274202	0.156
	752	Lib5	Trm_gut	RETINOL_METABOLISM	0.144148	0.646	0.215649	0.348
	753	Lib5	Trm_gut	DRUG_METABOLISM_OTHER_ENZYMES	0.156109	0.651	0.262752	0.222
	754	Lib5	Trm_gut	SYNTHESIS_OF_BILE_ACIDS_AND_BILE_SALTS_VIA_7ALPHA_HYDROXYCHOLESTEROL	0.145012	0.655	0.401944	0.071
	755	Lib5	Trm_gut	STEROID_HORMONE_BIOSYNTHESIS	0.136709	0.659	0.215208	0.309
	756	Lib5	Trm_gut	METABOLISM_OF_LIPIDS_AND_LIPOPROTEINS	0.127725	0.665	0.13065	0.613
	757	Lib5	Trm_gut	CHONDROITIN_SULFATE_DERMATAN_SULFATE_METABOLISM	0.136298	0.675	0.235281	0.29
	758	Lib5	Trm_gut	CHOLINE	0.149916	0.679	0.1468	0.643
	759	Lib5	Trm_gut	GLYCEROLIPID_METABOLISM	0.129291	0.702	0.379367	0.007
	760	Lib5	Trm_gut	NITRIC_OXIDE_STIMULATES_GUANYLATE_CYCLASE	0.130212	0.707	0.497357	0.001
	761	Lib5	Trm_gut	PRIMARY_BILE_ACID_BIOSYNTHESIS	0.129838	0.716	0.364931	0.11
	762	Lib5	Trm_gut	GLYCOSPHINGOLIPID_METABOLISM	0.125888	0.718	0.301116	0.121
	763	Lib5	Trm_gut	PPAR_SIGNALING_PATHWAY	0.119785	0.725	0.205691	0.278
	764	Lib5	Trm_gut	AQUAPORIN_MEDIATED_TRANSPORT	0.123238	0.73	0.164621	0.588
	765	Lib5	Trm_gut	ACYL_CHAIN_REMODELLING_OF_PC_PE_PG_PS	0.125944	0.733	0.251317	0.271
	766	Lib5	Trm_gut	PYRIMIDINE_METABOLISM	0.111802	0.743	0.119468	0.734
	767	Lib5	Trm_gut	SYNTHESIS_OF_BILE_ACIDS_AND_BILE_SALTS	0.114778	0.769	0.275178	0.266
	768	Lib5	Trm_gut	AMINE_COMPOUND_SLC_TRANSPORTERS	0.102904	0.78	0.0672016	0.888
	769	Lib5	Trm_gut	LINOLEIC_ACID_METABOLISM	0.102294	0.79	0.391829	0.053
	770	Lib5	Trm_gut	PEROXISOMAL_LIPID_METABOLISM	0.107012	0.796	0.443842	0.028
	771	Lib5	Trm_gut	PEROXISOME	0.105167	0.796	0.201681	0.399
	772	Lib5	Trm_gut	GLYCOSAMINOGLYCAN_METABOLISM	0.103198	0.799	0.126875	0.684
	773	Lib5	Trm_gut	TANDEM_PORE_DOMAIN_POTASSIUM_CHANNELS	0.106086	0.8	0.190223	0.586
	774	Lib5	Trm_gut	METABOLISM_OF_STEROID_HORMONES_AND_VITAMINS_A_AND_D	0.100646	0.8	0.284415	0.154
	775	Lib5	Trm_gut	HEPARAN_SULFATE_HEPARIN_HS_GAG_METABOLISM	0.103203	0.809	0.177637	0.508
	776	Lib5	Trm_gut	PROLINE_SYNTHESIS	0.121102	0.81	0.599496	0.111
	777	Lib5	Trm_gut	TAURINE_AND_HYPOTAURINE_METABOLISM	0.0990691	0.827	0.273629	0.402
	778	Lib5	Trm_gut	SYNTHESIS_OF_PA	0.0852031	0.833	0.367692	0.071
	779	Lib5	Trm_gut	DRUG_METABOLISM_CYTOCHROME_P450	0.090249	0.837	0.202684	0.346
	780	Lib5	Trm_gut	HISTIDINE_METABOLISM	0.0874768	0.837	0.367592	0.077
	781	Lib5	Trm_gut	PASSIVE_TRANSPORT_BY_AQUAPORINS	0.0837766	0.839	0.119681	0.773
	782	Lib5	Trm_gut	O_LINKED_GLYCOSYLATION_OF_MUCINS	0.100616	0.844	0.284886	0.121
	783	Lib5	Trm_gut	BETA_OXIDATION	0.0773686	0.862	0.273441	0.158
	784	Lib5	Trm_gut	TYROSINE_METABOLISM	0.0746669	0.868	0.382016	0.018
	785	Lib5	Trm_gut	TRANSPORT_OF_GLUCOSE_AND_OTHER_SUGARS_BILE_SALTS_AND_ORGANIC_ACIDS_METAL_IONS_AND_AMINE_COMPOUNDS	0.0878902	0.876	0.181653	0.316
	786	Lib5	Trm_gut	ION_CHANNEL_TRANSPORT	0.0762409	0.884	0.178537	0.421
	787	Lib5	Trm_gut	NITROGEN_METABOLISM	0.0662491	0.905	0.405602	0.021
	788	Lib5	Trm_gut	INTEGRATION_OF_ENERGY_METABOLISM	0.0632981	0.915	0.206403	0.335
	789	Lib5	Trm_gut	POTASSIUM_CHANNELS	0.070383	0.922	0.206935	0.21
	790	Lib5	Trm_gut	GLUTATHIONE_METABOLISM	0.0578253	0.929	0.323052	0.038
	791	Lib5	Trm_gut	METABOLISM_OF_XENOBIOTICS_BY_CYTOCHROME_P450	0.0557628	0.942	0.21946	0.29
	792	Lib5	Trm_gut	AMINO_ACID_SYNTHESIS_AND_INTERCONVERSION_TRANSAMINATION	0.035164	0.95	0.361921	0.148
	793	Lib5	Trm_gut	AMINO_ACID_AND_OLIGOPEPTIDE_SLC_TRANSPORTERS	0.0450919	0.951	0.207805	0.297
	794	Lib5	Trm_gut	FATTY_ACID_ACTIVATION_UPTAKE	0.0209581	0.957	0.464923	0.045
	795	Lib5	Trm_gut	PROLINE_DEGRADATION	0.0212342	0.964	0.530759	0.195
	796	Lib5	Trm_gut	ARACHIDONIC_ACID_METABOLISM	0.0411869	0.968	0.323936	0.03
	797	Lib5	Trm_gut	ARGININE_AND_PROLINE_METABOLISM	0.0397582	0.974	0.365707	0.004
	798	Lib5	Trm_gut	OTHER_GLYCAN_DEGRADATION	0.0109927	0.982	0.472726	0.016
	799	Lib5	Trm_gut	TRANSMEMBRANE_TRANSPORT_OF_SMALL_MOLECULES	0.0693028	0.987	0.142512	0.45
	800	Lib5	Trm_gut	SLC_MEDIATED_TRANSMEMBRANE_TRANSPORT	0.0425286	0.997	0.160477	0.317
	801	Lib5	Trm_liver	ADVANCED_GLYCOSYLATION_ENDPRODUCT_RECEPTOR_SIGNALING	0.976459	0.001	0.506884	0.346
	802	Lib5	Trm_liver	PURINE_RIBONUCLEOSIDE_MONOPHOSPHATE_BIOSYNTHESIS	0.749751	0.001	0.122838	0.756
	803	Lib5	Trm_liver	SYNTHESIS_OF_DNA	0.733003	0.001	0.0468643	0.957
	804	Lib5	Trm_liver	METABOLISM_OF_RNA	0.733003	0.001	0.0468643	0.928
	805	Lib5	Trm_liver	METABOLISM_OF_MRNA	0.733003	0.001	0.0468643	0.943
	806	Lib5	Trm_liver	TRNA_AMINOACYLATION	0.712212	0.001	0.0359148	0.973
	807	Lib5	Trm_liver	AMINOACYL_TRNA_BIOSYNTHESIS	0.686279	0.001	0.0384836	0.951
	808	Lib5	Trm_liver	TERPENOID_BACKBONE_BIOSYNTHESIS	0.648443	0.001	0.186934	0.575
	809	Lib5	Trm_liver	REGULATION_OF_ORNITHINE_DECARBOXYLASE_ODC	0.631676	0.001	0.0523027	0.94
	810	Lib5	Trm_liver	OXPHO_COMPLEX_I	0.561451	0.001	0.102514	0.797
	811	Lib5	Trm_liver	IRON_UPTAKE_AND_TRANSPORT	0.527283	0.001	0.102184	0.786
	812	Lib5	Trm_liver	PORPHYRIN_AND_CHLOROPHYLL_METABOLISM	0.516637	0.001	0.124628	0.707
	813	Lib5	Trm_liver	OXIDATIVE_PHOSPHORYLATION	0.497851	0.001	0.0317684	0.993
	814	Lib5	Trm_liver	RESPIRATORY_ELECTRON_TRANSPORT	0.486929	0.001	0.0631544	0.928
	815	Lib5	Trm_liver	TCA_CYCLE_AND_RESPIRATORY_ELECTRON_TRANSPORT	0.415611	0.001	0.0846031	0.902
	816	Lib5	Trm_liver	ASPARAGINE_N_LINKED_GLYCOSYLATION	0.372191	0.001	0.0812173	0.884
	817	Lib5	Trm_liver	TCA_CYCLE	0.483454	0.001	0.0686681	0.884
	818	Lib5	Trm_liver	SGOCP_ALL	0.364343	0.001	0.0832642	0.875
	819	Lib5	Trm_liver	ACTIVATION_OF_GENES_BY_ATF4	0.952255	0.002	0.514135	0.377
	820	Lib5	Trm_liver	VALINE_LEUCINE_AND_ISOLEUCINE_BIOSYNTHESIS	0.61358	0.002	0.117159	0.785
	821	Lib5	Trm_liver	METABOLISM_OF_PROTEINS	0.295057	0.003	0.145785	0.532
	822	Lib5	Trm_liver	OXPHO_COMPLEX_II	0.853019	0.004	0.00729927	0.985
	823	Lib5	Trm_liver	METABOLISM_OF_NUCLEOTIDES	0.328321	0.005	0.0680034	0.914
	824	Lib5	Trm_liver	OXPHO_COMPLEX_V	0.586777	0.006	0.236803	0.449
	825	Lib5	Trm_liver	N_GLYCAN_BIOSYNTHESIS	0.415719	0.006	0.106256	0.791
	826	Lib5	Trm_liver	PYRUVATE_METABOLISM_AND_CITRIC_ACID_TCA_CYCLE	0.402594	0.006	0.174628	0.497
	827	Lib5	Trm_liver	SYNTHESIS_OF_PIPS_AT_THE_LATE_ENDOSOME_MEMBRANE	0.745741	0.008	0.212217	0.628
	828	Lib5	Trm_liver	PENTOSE_PHOSPHATE	0.716311	0.008	0.0225839	0.966
	829	Lib5	Trm_liver	SYNTHESIS_AND_INTERCONVERSION_OF_NUCLEOTIDE_DI_AND_TRIPHOSPHATES	0.524066	0.008	0.176835	0.596
	830	Lib5	Trm_liver	REGULATION_OF_AUTOPHAGY	0.78065	0.015	0.343224	0.462
	831	Lib5	Trm_liver	METABOLISM_OF_VITAMINS_AND_COFACTORS	0.326052	0.017	0.169732	0.46
	832	Lib5	Trm_liver	SYNTHESIS_OF_SUBSTRATES_IN_N_GLYCAN_BIOSYTHESIS	0.505078	0.019	0.110694	0.805
	833	Lib5	Trm_liver	METABOLISM_OF_PORPHYRINS	0.504011	0.019	0.135404	0.724
	834	Lib5	Trm_liver	CERAMIDE_PATHWAY	0.665137	0.02	0.24183	0.548
	835	Lib5	Trm_liver	LIPOGENESIS	0.352847	0.021	0.119841	0.74
	836	Lib5	Trm_liver	BIOSYNTHESIS_OF_UNSATURATED_FATTY_ACIDS	0.441298	0.026	0.213103	0.462
	837	Lib5	Trm_liver	ONE_CARBON_POOL_BY_FOLATE	0.465609	0.027	0.216441	0.448
	838	Lib5	Trm_liver	GLYOXYLATE_AND_DICARBOXYLATE_METABOLISM	0.443741	0.033	0.148298	0.666
	839	Lib5	Trm_liver	INOSITOL_PHOSPHATE_METABOLISM	0.307108	0.034	0.185051	0.382
	840	Lib5	Trm_liver	VITAMIN_B5_PANTOTHENATE_METABOLISM	0.4982	0.039	0.232383	0.462
	841	Lib5	Trm_liver	PYRIMIDINE_METABOLISM	0.299137	0.042	0.148248	0.603
	842	Lib5	Trm_liver	AMINO_SUGAR_AND_NUCLEOTIDE_SUGAR_METABOLISM	0.306496	0.043	0.135829	0.697
	843	Lib5	Trm_liver	OXPHO_COMPLEX_IV	0.411398	0.045	0.124966	0.716
	844	Lib5	Trm_liver	GOLGI_ASSOCIATED_VESICLE_BIOGENESIS	0.653175	0.05	0.330849	0.428
	845	Lib5	Trm_liver	GLUCURONIDATION	0.510006	0.051	0.226363	0.529
	846	Lib5	Trm_liver	PENTOSE_AND_GLUCURONATE_INTERCONVERSIONS	0.422691	0.051	0.220436	0.47
	847	Lib5	Trm_liver	METABOLISM_OF_AMINO_ACIDS_AND_DERIVATIVES	0.22142	0.053	0.115903	0.757
	848	Lib5	Trm_liver	SYNTHESIS_OF_VERY_LONG_CHAIN_FATTY_ACYL_COAS	0.413628	0.071	0.342714	0.193
	849	Lib5	Trm_liver	TERMINATION_OF_O_GLYCAN_BIOSYNTHESIS	0.492476	0.083	0.384237	0.206
	850	Lib5	Trm_liver	ALDOSTERONE_REGULATED_SODIUM_REABSORPTION	0.342854	0.087	0.0992537	0.789
	851	Lib5	Trm_liver	DRUG_METABOLISM_OTHER_ENZYMES	0.319825	0.092	0.230558	0.288
	852	Lib5	Trm_liver	SULFUR_AMINO_ACID_METABOLISM	0.328395	0.104	0.210428	0.407
	853	Lib5	Trm_liver	IONOTROPIC_ACTIVITY_OF_KAINATE_RECEPTORS	0.529439	0.109	0.573954	0.086
	854	Lib5	Trm_liver	REGULATION_OF_PYRUVATE_DEHYDROGENASE_PDH_COMPLEX	0.418161	0.111	0.489605	0.054
	855	Lib5	Trm_liver	UNFOLDED_PROTEIN_RESPONSE	0.484909	0.114	0.282704	0.425
	856	Lib5	Trm_liver	ETHANOL_OXIDATION	0.453634	0.135	0.443293	0.137
	857	Lib5	Trm_liver	PROLINE_SYNTHESIS	0.594324	0.141	0.104844	0.823
	858	Lib5	Trm_liver	SYNTHESIS_OF_PIPS_AT_THE_GOLGI_MEMBRANE	0.357298	0.148	0.244602	0.415
	859	Lib5	Trm_liver	ASCORBATE_AND_ALDARATE_METABOLISM	0.356494	0.149	0.169922	0.627
	860	Lib5	Trm_liver	ALANINE_ASPARTATE_AND_GLUTAMATE_METABOLISM	0.290016	0.153	0.0666623	0.896
	861	Lib5	Trm_liver	SELENOAMINO_ACID_METABOLISM	0.311281	0.156	0.101302	0.817
	862	Lib5	Trm_liver	PANTOTHENATE_AND_COA_BIOSYNTHESIS	0.35008	0.157	0.453443	0.04
	863	Lib5	Trm_liver	SYNTHESIS_OF_PIPS_AT_THE_EARLY_ENDOSOME_MEMBRANE	0.428907	0.158	0.297839	0.359
	864	Lib5	Trm_liver	GLUTAMINOLYSIS	0.354903	0.166	0.137059	0.702
	865	Lib5	Trm_liver	CYSTEINE_AND_METHIONINE_METABOLISM	0.284289	0.169	0.191745	0.465
	866	Lib5	Trm_liver	LYSOSOME_VESICLE_BIOGENESIS	0.598856	0.179	0.946806	0.001
	867	Lib5	Trm_liver	KERATAN_SULFATE_BIOSYNTHESIS	0.304185	0.179	0.18891	0.514
	868	Lib5	Trm_liver	POST_TRANSLATIONAL_MODIFICATION_SYNTHESIS_OF_GPI_ANCHORED_PROTEINS	0.295142	0.184	0.200799	0.444
	869	Lib5	Trm_liver	CHREBP2_PATHWAY	0.458647	0.19	0.33762	0.39
	870	Lib5	Trm_liver	PTM_GAMMA_CARBOXYLATION_HYPUSINE_FORMATION_AND_ARYLSULFATASE_ACTIVATION	0.37758	0.191	0.280914	0.372
	871	Lib5	Trm_liver	CHOLESTEROGENESIS	0.296354	0.191	0.327869	0.1
	872	Lib5	Trm_liver	OXPHO_COMPLEX_III	0.52116	0.197	0.0902455	0.848
	873	Lib5	Trm_liver	O_GLYCAN_BIOSYNTHESIS	0.275295	0.202	0.350315	0.077
	874	Lib5	Trm_liver	TANDEM_PORE_DOMAIN_POTASSIUM_CHANNELS	0.341707	0.216	0.322514	0.242
	875	Lib5	Trm_liver	FOLATE_BIOSYNTHESIS	0.376356	0.228	0.304598	0.349
	876	Lib5	Trm_liver	GH_PATHWAY	0.372782	0.229	0.284637	0.387
	877	Lib5	Trm_liver	NICOTINATE_AND_NICOTINAMIDE_METABOLISM	0.275994	0.231	0.231996	0.331
	878	Lib5	Trm_liver	PYRUVATE_to_ACETYL_coA	0.446183	0.237	0.268524	0.555
	879	Lib5	Trm_liver	GLUTATHIONE_METABOLISM	0.233011	0.242	0.190307	0.392
	880	Lib5	Trm_liver	RIBOFLAVIN_METABOLISM	0.325986	0.252	0.335029	0.228
	881	Lib5	Trm_liver	GLYCOSYLPHOSPHATIDYLINOSITOL_GPI_ANCHOR_BIOSYNTHESIS	0.253007	0.252	0.225638	0.393
	882	Lib5	Trm_liver	LACTATE_GENERATION	0.52734	0.253	0.336757	0.517
	883	Lib5	Trm_liver	ABACAVIR_TRANSPORT_AND_METABOLISM	0.3191	0.26	0.284388	0.366
	884	Lib5	Trm_liver	KETOGENESIS	0.395789	0.261	0.55174	0.086
	885	Lib5	Trm_liver	HIF_PATHWAY	0.374162	0.264	0.420529	0.172
	886	Lib5	Trm_liver	PAR1_PATHWAY	0.364746	0.265	0.491199	0.128
	887	Lib5	Trm_liver	REGULATION_OF_GLUCOKINASE_BY_GLUCOKINASE_REGULATORY_PROTEIN	0.514924	0.279	0.671616	0.105
	888	Lib5	Trm_liver	ALPHA_LINOLENIC_ACID_METABOLISM	0.240624	0.281	0.310746	0.12
	889	Lib5	Trm_liver	TRANSPORT_OF_VITAMINS_NUCLEOSIDES_AND_RELATED_MOLECULES	0.239786	0.281	0.164206	0.55
	890	Lib5	Trm_liver	CHYLOMICRON_MEDIATED_LIPID_TRANSPORT	0.315935	0.294	0.225855	0.492
	891	Lib5	Trm_liver	GLYCOLYSIS_GLUCONEOGENESIS	0.2077	0.295	0.203956	0.297
	892	Lib5	Trm_liver	LIMONENE_AND_PINENE_DEGRADATION	0.31503	0.3	0.338911	0.251
	893	Lib5	Trm_liver	FATTY_ACID_ACTIVATION_UPTAKE	0.294311	0.304	0.335658	0.226
	894	Lib5	Trm_liver	LIPOPROTEIN_METABOLISM	0.268567	0.307	0.394501	0.096
	895	Lib5	Trm_liver	SPHINGOLIPID_DE_NOVO_BIOSYNTHESIS	0.24647	0.314	0.262307	0.293
	896	Lib5	Trm_liver	PGC1A_PATHWAY	0.493704	0.316	0.773134	0.033
	897	Lib5	Trm_liver	AMINO_ACID_SYNTHESIS_AND_INTERCONVERSION_TRANSAMINATION	0.275493	0.324	0.0948492	0.799
	898	Lib5	Trm_liver	GLYCOLYSIS	0.225422	0.329	0.189214	0.454
	899	Lib5	Trm_liver	GLYCOGEN_BREAKDOWN_GLYCOGENOLYSIS	0.312461	0.331	0.615217	0.016
	900	Lib5	Trm_liver	BUTANOATE_METABOLISM	0.211175	0.336	0.356553	0.026
	901	Lib5	Trm_liver	O_LINKED_GLYCOSYLATION_OF_MUCINS	0.208817	0.347	0.382413	0.012
	902	Lib5	Trm_liver	BETA_OXIDATION	0.203693	0.364	0.326092	0.057
	903	Lib5	Trm_liver	TRIGLYCERIDE_BIOSYNTHESIS	0.211302	0.365	0.319162	0.066
	904	Lib5	Trm_liver	KETOLYSIS	0.372027	0.367	0.689244	0.04
	905	Lib5	Trm_liver	GALACTOSE_METABOLISM	0.218139	0.368	0.130809	0.708
	906	Lib5	Trm_liver	KERATAN_SULFATE_KERATIN_METABOLISM	0.220177	0.374	0.231908	0.364
	907	Lib5	Trm_liver	FRUCTOSE_AND_MANNOSE_METABOLISM	0.213616	0.379	0.197556	0.431
	908	Lib5	Trm_liver	GLYCOSPHINGOLIPID_METABOLISM	0.209836	0.386	0.186127	0.484
	909	Lib5	Trm_liver	ENDOCYTOSIS	0.378405	0.387	0.683501	0.061
	910	Lib5	Trm_liver	PRIMARY_BILE_ACID_BIOSYNTHESIS	0.229831	0.411	0.47935	0.014
	911	Lib5	Trm_liver	LYSOSOME	0.175788	0.414	0.182107	0.399
	912	Lib5	Trm_liver	FATTY_ACID_TRIACYLGLYCEROL_AND_KETONE_BODY_METABOLISM	0.166066	0.416	0.269747	0.031
	913	Lib5	Trm_liver	KERATAN_SULFATE_DEGRADATION	0.31563	0.417	0.699546	0.027
	914	Lib5	Trm_liver	OXYGEN_DEPENDENT_PROLINE_HYDROXYLATION_OF_HYPOXIA_INDUCIBLE_FACTOR_ALPHA	0.292312	0.426	0.558171	0.07
	915	Lib5	Trm_liver	HEPARAN_SULFATE_HEPARIN_HS_GAG_METABOLISM	0.196717	0.427	0.0704009	0.904
	916	Lib5	Trm_liver	SYNTHESIS_OF_PA	0.208681	0.431	0.476513	0.003
	917	Lib5	Trm_liver	ACYL_CHAIN_REMODELLING_OF_PC_PE_PG_PS	0.206916	0.442	0.467341	0.007
	918	Lib5	Trm_liver	GLUCONEOGENESIS	0.190288	0.452	0.139541	0.644
	919	Lib5	Trm_liver	LYSINE_DEGRADATION	0.202378	0.459	0.357535	0.062
	920	Lib5	Trm_liver	REGULATION_OF_WATER_BALANCE_BY_RENAL_AQUAPORINS	0.214009	0.47	0.379555	0.09
	921	Lib5	Trm_liver	REGULATION_OF_HYPOXIA_INDUCIBLE_FACTOR_HIF_BY_OXYGEN	0.248358	0.478	0.404973	0.186
	922	Lib5	Trm_liver	GLUCOSE_METABOLISM	0.172451	0.479	0.162303	0.546
	923	Lib5	Trm_liver	PURINE_CATABOLISM	0.240546	0.481	0.233512	0.476
	924	Lib5	Trm_liver	ETHER_LIPID_METABOLISM	0.190401	0.481	0.355114	0.063
	925	Lib5	Trm_liver	ACTIVATION_OF_KAINATE_RECEPTORS_UPON_GLUTAMATE_BINDING	0.23841	0.482	0.496802	0.054
	926	Lib5	Trm_liver	SYNTHESIS_OF_BILE_ACIDS_AND_BILE_SALTS	0.190123	0.517	0.497804	0.006
	927	Lib5	Trm_liver	BRANCHED_CHAIN_AMINO_ACID_CATABOLISM	0.187976	0.517	0.239606	0.369
	928	Lib5	Trm_liver	BILE_ACID_AND_BILE_SALT_METABOLISM	0.176635	0.52	0.409686	0.029
	929	Lib5	Trm_liver	GLYCINE_SERINE_AND_THREONINE_METABOLISM	0.173664	0.521	0.230554	0.305
	930	Lib5	Trm_liver	PYRIMIDINE_CATABOLISM	0.215601	0.532	0.427501	0.102
	931	Lib5	Trm_liver	LINOLEIC_ACID_METABOLISM	0.187326	0.542	0.494086	0.002
	932	Lib5	Trm_liver	REGULATION_OF_INSULIN_SECRETION_BY_ACETYLCHOLINE	0.249628	0.546	0.639455	0.042
	933	Lib5	Trm_liver	FATTY_ACID_METABOLISM	0.163935	0.549	0.304586	0.086
	934	Lib5	Trm_liver	RETINOL_METABOLISM	0.163496	0.55	0.197545	0.39
	935	Lib5	Trm_liver	HYALURONAN_METABOLISM	0.200265	0.554	0.317522	0.27
	936	Lib5	Trm_liver	NUCLEARRS_PATHWAY	0.198972	0.567	0.523057	0.025
	937	Lib5	Trm_liver	ABC_TRANSPORTERS	0.153526	0.567	0.16339	0.524
	938	Lib5	Trm_liver	STARCH_AND_SUCROSE_METABOLISM	0.161196	0.57	0.335027	0.052
	939	Lib5	Trm_liver	HISTIDINE_METABOLISM	0.175967	0.571	0.262516	0.308
	940	Lib5	Trm_liver	PPAR_SIGNALING_PATHWAY	0.149855	0.573	0.237748	0.185
	941	Lib5	Trm_liver	TAURINE_AND_HYPOTAURINE_METABOLISM	0.201485	0.579	0.187939	0.592
	942	Lib5	Trm_liver	CHONDROITIN_SULFATE_DERMATAN_SULFATE_METABOLISM	0.164169	0.58	0.160478	0.604
	943	Lib5	Trm_liver	ANDROGEN_BIOSYNTHESIS	0.230072	0.585	0.490264	0.132
	944	Lib5	Trm_liver	METABOLISM_OF_POLYAMINES	0.177096	0.585	0.537002	0.016
	945	Lib5	Trm_liver	GLYCEROPHOSPHOLIPID_METABOLISM	0.140979	0.602	0.323855	0.012
	946	Lib5	Trm_liver	SULFUR_METABOLISM	0.193333	0.606	0.266015	0.414
	947	Lib5	Trm_liver	AQUAPORIN_MEDIATED_TRANSPORT	0.161639	0.611	0.338509	0.102
	948	Lib5	Trm_liver	AMINE_COMPOUND_SLC_TRANSPORTERS	0.155379	0.613	0.15195	0.614
	949	Lib5	Trm_liver	PHENYLALANINE_METABOLISM	0.158719	0.62	0.413182	0.049
	950	Lib5	Trm_liver	LIPID_DIGESTION_MOBILIZATION_AND_TRANSPORT	0.159571	0.624	0.296397	0.151
	951	Lib5	Trm_liver	SYNTHESIS_OF_BILE_ACIDS_AND_BILE_SALTS_VIA_24_HYDROXYCHOLESTEROL	0.169912	0.639	0.672852	0.001
	952	Lib5	Trm_liver	CHOLINE	0.154515	0.647	0.176446	0.584
	953	Lib5	Trm_liver	GLUCOSE_TRANSPORT	0.162103	0.648	0.308978	0.21
	954	Lib5	Trm_liver	BILE_SALT_AND_ORGANIC_ANION_SLC_TRANSPORTERS	0.152429	0.677	0.433596	0.108
	955	Lib5	Trm_liver	TRYPTOPHAN_CATABOLISM	0.165327	0.679	0.667431	0.001
	956	Lib5	Trm_liver	VALINE_LEUCINE_AND_ISOLEUCINE_DEGRADATION	0.133186	0.686	0.283179	0.092
	957	Lib5	Trm_liver	PURINE_SALVAGE	0.14807	0.698	0.329612	0.206
	958	Lib5	Trm_liver	METAL_ION_SLC_TRANSPORTERS	0.137099	0.7	0.251169	0.296
	959	Lib5	Trm_liver	SYNTHESIS_OF_PIPS_AT_THE_PLASMA_MEMBRANE	0.134353	0.705	0.360746	0.052
	960	Lib5	Trm_liver	SPHINGOLIPID_METABOLISM	0.126959	0.705	0.207478	0.309
	961	Lib5	Trm_liver	SYNTHESIS_OF_PC	0.137053	0.707	0.27713	0.28
	962	Lib5	Trm_liver	SYNTHESIS_OF_BILE_ACIDS_AND_BILE_SALTS_VIA_7ALPHA_HYDROXYCHOLESTEROL	0.126801	0.719	0.586101	0.003
	963	Lib5	Trm_liver	DIGESTION_OF_DIETARY_CARBOHYDRATE	0.144706	0.735	0.651509	0.042
	964	Lib5	Trm_liver	PEROXISOMAL_LIPID_METABOLISM	0.12075	0.735	0.385886	0.064
	965	Lib5	Trm_liver	PROPANOATE_METABOLISM	0.112909	0.761	0.211853	0.378
	966	Lib5	Trm_liver	PASSIVE_TRANSPORT_BY_AQUAPORINS	0.118592	0.763	0.426535	0.132
	967	Lib5	Trm_liver	STEROID_HORMONE_BIOSYNTHESIS	0.115089	0.763	0.330525	0.048
	968	Lib5	Trm_liver	METABOLISM_OF_CARBOHYDRATES	0.112057	0.763	0.0803932	0.944
	969	Lib5	Trm_liver	PURINE_METABOLISM	0.113274	0.773	0.0683491	0.953
	970	Lib5	Trm_liver	PYRUVATE_METABOLISM	0.10548	0.783	0.276944	0.073
	971	Lib5	Trm_liver	DRUG_METABOLISM_CYTOCHROME_P450	0.104784	0.786	0.310612	0.048
	972	Lib5	Trm_liver	NITRIC_OXIDE_STIMULATES_GUANYLATE_CYCLASE	0.097959	0.789	0.452908	0.004
	973	Lib5	Trm_liver	METABOLISM_OF_XENOBIOTICS_BY_CYTOCHROME_P450	0.102654	0.793	0.317361	0.043
	974	Lib5	Trm_liver	PEROXISOME	0.103577	0.799	0.230306	0.308
	975	Lib5	Trm_liver	NITROGEN_METABOLISM	0.102825	0.799	0.153438	0.636
	976	Lib5	Trm_liver	ION_CHANNEL_TRANSPORT	0.0986181	0.803	0.12271	0.715
	977	Lib5	Trm_liver	PHOSPHOLIPID_METABOLISM	0.105403	0.808	0.199044	0.122
	978	Lib5	Trm_liver	SYNTHESIS_OF_PE	0.0996767	0.811	0.386106	0.16
	979	Lib5	Trm_liver	AMINO_ACID_AND_OLIGOPEPTIDE_SLC_TRANSPORTERS	0.0972866	0.825	0.207231	0.326
	980	Lib5	Trm_liver	GLYCEROPHOSPHOLIPID_BIOSYNTHESIS	0.095087	0.832	0.307464	0.008
	981	Lib5	Trm_liver	BETA_ALANINE_METABOLISM	0.0873292	0.834	0.351111	0.091
	982	Lib5	Trm_liver	GLYCOSAMINOGLYCAN_METABOLISM	0.0900629	0.838	0.08694	0.885
	983	Lib5	Trm_liver	INTEGRATION_OF_ENERGY_METABOLISM	0.0889667	0.845	0.162361	0.532
	984	Lib5	Trm_liver	OTHER_GLYCAN_DEGRADATION	0.0849206	0.847	0.30505	0.21
	985	Lib5	Trm_liver	MITOCHONDRIAL_FATTY_ACID_BETA_OXIDATION	0.0862184	0.852	0.211595	0.472
	986	Lib5	Trm_liver	METABOLISM_OF_LIPIDS_AND_LIPOPROTEINS	0.102397	0.856	0.215154	0.007
	987	Lib5	Trm_liver	TRYPTOPHAN_METABOLISM	0.0828493	0.856	0.431496	0.001
	988	Lib5	Trm_liver	ARGININE_AND_PROLINE_METABOLISM	0.0858444	0.861	0.201842	0.322
	989	Lib5	Trm_liver	METABOLISM_OF_STEROID_HORMONES_AND_VITAMINS_A_AND_D	0.0814713	0.865	0.439541	0.007
	990	Lib5	Trm_liver	POLYAMINE_SYNTHESIS	0.0826419	0.878	0.38699	0.285
	991	Lib5	Trm_liver	TYROSINE_METABOLISM	0.0729809	0.88	0.473483	0.001
	992	Lib5	Trm_liver	GLYCEROLIPID_METABOLISM	0.0723382	0.894	0.289232	0.094
	993	Lib5	Trm_liver	ARACHIDONIC_ACID_METABOLISM	0.0731845	0.896	0.389677	0.002
	994	Lib5	Trm_liver	TRANSMEMBRANE_TRANSPORT_OF_SMALL_MOLECULES	0.101189	0.899	0.157603	0.258
	995	Lib5	Trm_liver	TRANSPORT_OF_GLUCOSE_AND_OTHER_SUGARS_BILE_SALTS_AND_ORGANIC_ACIDS_METAL_IONS_AND_AMINE_COMPOUNDS	0.0699146	0.923	0.215991	0.167
	996	Lib5	Trm_liver	SLC_MEDIATED_TRANSMEMBRANE_TRANSPORT	0.0762535	0.955	0.219034	0.03
	997	Lib5	Trm_liver	POTASSIUM_CHANNELS	0.0425611	0.967	0.230633	0.104
	998	Lib5	Trm_liver	PROLINE_DEGRADATION	0.0149303	0.973	0.500913	0.211
	999	Lib5	Trm_liver	VOLTAGE_GATED_POTASSIUM_CHANNELS	0.0247771	0.985	0.246411	0.165
	1000	Lib5	Trm_liver	STEROID_BIOSYNTHESIS	0.00233178	0.992	0.567684	0.002
	1001	Lib5	Ttem	ADVANCED_GLYCOSYLATION_ENDPRODUCT_RECEPTOR_SIGNALING	0.994032	0.001	0.502999	0.37
	1002	Lib5	Ttem	PENTOSE_PHOSPHATE	0.852198	0.001	0.01727	0.968
	1003	Lib5	Ttem	TRNA_AMINOACYLATION	0.835802	0.001	0.0332072	0.962
	1004	Lib5	Ttem	AMINOACYL_TRNA_BIOSYNTHESIS	0.831407	0.001	0.0347815	0.959
	1005	Lib5	Ttem	SYNTHESIS_OF_DNA	0.825328	0.001	0.0424721	0.949
	1006	Lib5	Ttem	METABOLISM_OF_RNA	0.825328	0.001	0.0424721	0.951
	1007	Lib5	Ttem	METABOLISM_OF_MRNA	0.825328	0.001	0.0424721	0.946
	1008	Lib5	Ttem	PURINE_RIBONUCLEOSIDE_MONOPHOSPHATE_BIOSYNTHESIS	0.801214	0.001	0.117366	0.765
	1009	Lib5	Ttem	REGULATION_OF_ORNITHINE_DECARBOXYLASE_ODC	0.739983	0.001	0.0385253	0.95
	1010	Lib5	Ttem	OXPHO_COMPLEX_I	0.699209	0.001	0.0954432	0.838
	1011	Lib5	Ttem	METABOLISM_OF_PORPHYRINS	0.685641	0.001	0.127133	0.746
	1012	Lib5	Ttem	TERPENOID_BACKBONE_BIOSYNTHESIS	0.64723	0.001	0.107175	0.801
	1013	Lib5	Ttem	PORPHYRIN_AND_CHLOROPHYLL_METABOLISM	0.604617	0.001	0.101016	0.816
	1014	Lib5	Ttem	OXIDATIVE_PHOSPHORYLATION	0.576792	0.001	0.0322111	0.988
	1015	Lib5	Ttem	RESPIRATORY_ELECTRON_TRANSPORT	0.566925	0.001	0.0615474	0.916
	1016	Lib5	Ttem	N_GLYCAN_BIOSYNTHESIS	0.553094	0.001	0.0737434	0.869
	1017	Lib5	Ttem	IRON_UPTAKE_AND_TRANSPORT	0.529995	0.001	0.0966698	0.802
	1018	Lib5	Ttem	TCA_CYCLE_AND_RESPIRATORY_ELECTRON_TRANSPORT	0.511065	0.001	0.0950047	0.853
	1019	Lib5	Ttem	ASPARAGINE_N_LINKED_GLYCOSYLATION	0.463302	0.001	0.0561442	0.96
	1020	Lib5	Ttem	METABOLISM_OF_PROTEINS	0.309284	0.001	0.133716	0.626
	1021	Lib5	Ttem	PYRUVATE_METABOLISM_AND_CITRIC_ACID_TCA_CYCLE	0.473886	0.001	0.292741	0.094
	1022	Lib5	Ttem	VALINE_LEUCINE_AND_ISOLEUCINE_BIOSYNTHESIS	0.63057	0.002	0.170918	0.656
	1023	Lib5	Ttem	TCA_CYCLE	0.457681	0.002	0.174333	0.51
	1024	Lib5	Ttem	SYNTHESIS_AND_INTERCONVERSION_OF_NUCLEOTIDE_DI_AND_TRIPHOSPHATES	0.502907	0.003	0.159406	0.638
	1025	Lib5	Ttem	SYNTHESIS_OF_SUBSTRATES_IN_N_GLYCAN_BIOSYTHESIS	0.590874	0.004	0.11501	0.793
	1026	Lib5	Ttem	ONE_CARBON_POOL_BY_FOLATE	0.535258	0.004	0.129965	0.712
	1027	Lib5	Ttem	METABOLISM_OF_NUCLEOTIDES	0.35343	0.004	0.103533	0.796
	1028	Lib5	Ttem	GLUCURONIDATION	0.643232	0.007	0.24747	0.455
	1029	Lib5	Ttem	OXPHO_COMPLEX_IV	0.532176	0.008	0.201574	0.503
	1030	Lib5	Ttem	DIGESTION_OF_DIETARY_CARBOHYDRATE	0.735577	0.009	0.125124	0.78
	1031	Lib5	Ttem	OXPHO_COMPLEX_V	0.611261	0.009	0.215013	0.529
	1032	Lib5	Ttem	OXPHO_COMPLEX_II	0.786814	0.011	0.00298607	0.994
	1033	Lib5	Ttem	CHREBP2_PATHWAY	0.679879	0.012	0.251625	0.528
	1034	Lib5	Ttem	TERMINATION_OF_O_GLYCAN_BIOSYNTHESIS	0.623638	0.013	0.397608	0.215
	1035	Lib5	Ttem	AMINO_SUGAR_AND_NUCLEOTIDE_SUGAR_METABOLISM	0.348199	0.014	0.0799212	0.883
	1036	Lib5	Ttem	INOSITOL_PHOSPHATE_METABOLISM	0.327843	0.014	0.163819	0.488
	1037	Lib5	Ttem	SYNTHESIS_OF_PIPS_AT_THE_LATE_ENDOSOME_MEMBRANE	0.705691	0.015	0.240826	0.541
	1038	Lib5	Ttem	REGULATION_OF_PYRUVATE_DEHYDROGENASE_PDH_COMPLEX	0.591981	0.015	0.497635	0.048
	1039	Lib5	Ttem	ASCORBATE_AND_ALDARATE_METABOLISM	0.5052	0.015	0.229451	0.443
	1040	Lib5	Ttem	CERAMIDE_PATHWAY	0.67446	0.018	0.241173	0.556
	1041	Lib5	Ttem	CHOLESTEROGENESIS	0.433666	0.019	0.251013	0.294
	1042	Lib5	Ttem	ACTIVATION_OF_GENES_BY_ATF4	0.894254	0.024	0.632649	0.266
	1043	Lib5	Ttem	METABOLISM_OF_VITAMINS_AND_COFACTORS	0.330812	0.025	0.0727477	0.911
	1044	Lib5	Ttem	HIF_PATHWAY	0.605072	0.028	0.494147	0.121
	1045	Lib5	Ttem	LYSOSOME_VESICLE_BIOGENESIS	0.78985	0.033	0.745333	0.059
	1046	Lib5	Ttem	PYRIMIDINE_METABOLISM	0.299245	0.038	0.124034	0.709
	1047	Lib5	Ttem	REGULATION_OF_AUTOPHAGY	0.721775	0.041	0.407093	0.336
	1048	Lib5	Ttem	LIPOGENESIS	0.331414	0.042	0.143718	0.635
	1049	Lib5	Ttem	GOLGI_ASSOCIATED_VESICLE_BIOGENESIS	0.667251	0.045	0.38085	0.317
	1050	Lib5	Ttem	METABOLISM_OF_AMINO_ACIDS_AND_DERIVATIVES	0.215458	0.049	0.062483	0.979
	1051	Lib5	Ttem	SELENOAMINO_ACID_METABOLISM	0.379654	0.062	0.168459	0.568
	1052	Lib5	Ttem	REGULATION_OF_HYPOXIA_INDUCIBLE_FACTOR_HIF_BY_OXYGEN	0.494093	0.068	0.379737	0.193
	1053	Lib5	Ttem	ENDOCYTOSIS	0.656393	0.073	0.326449	0.473
	1054	Lib5	Ttem	SGOCP_ALL	0.270331	0.074	0.176245	0.417
	1055	Lib5	Ttem	PENTOSE_AND_GLUCURONATE_INTERCONVERSIONS	0.39758	0.097	0.226622	0.443
	1056	Lib5	Ttem	LYSINE_DEGRADATION	0.340135	0.1	0.20313	0.431
	1057	Lib5	Ttem	SYNTHESIS_OF_PIPS_AT_THE_GOLGI_MEMBRANE	0.381723	0.101	0.203267	0.546
	1058	Lib5	Ttem	FOLATE_BIOSYNTHESIS	0.465039	0.105	0.408711	0.181
	1059	Lib5	Ttem	ALANINE_ASPARTATE_AND_GLUTAMATE_METABOLISM	0.297625	0.107	0.102822	0.793
	1060	Lib5	Ttem	VITAMIN_B5_PANTOTHENATE_METABOLISM	0.412079	0.11	0.0865931	0.864
	1061	Lib5	Ttem	PYRUVATE_to_ACETYL_coA	0.574456	0.111	0.386375	0.299
	1062	Lib5	Ttem	PROPANOATE_METABOLISM	0.300007	0.114	0.233309	0.29
	1063	Lib5	Ttem	SPHINGOLIPID_DE_NOVO_BIOSYNTHESIS	0.338094	0.118	0.227766	0.404
	1064	Lib5	Ttem	POST_TRANSLATIONAL_MODIFICATION_SYNTHESIS_OF_GPI_ANCHORED_PROTEINS	0.316483	0.125	0.274323	0.23
	1065	Lib5	Ttem	BIOSYNTHESIS_OF_UNSATURATED_FATTY_ACIDS	0.336216	0.127	0.22532	0.427
	1066	Lib5	Ttem	IONOTROPIC_ACTIVITY_OF_KAINATE_RECEPTORS	0.486465	0.137	0.499879	0.143
	1067	Lib5	Ttem	STARCH_AND_SUCROSE_METABOLISM	0.267009	0.138	0.271994	0.143
	1068	Lib5	Ttem	LACTATE_GENERATION	0.638551	0.142	0.319555	0.535
	1069	Lib5	Ttem	SYNTHESIS_OF_PIPS_AT_THE_PLASMA_MEMBRANE	0.292717	0.147	0.231196	0.352
	1070	Lib5	Ttem	ABACAVIR_TRANSPORT_AND_METABOLISM	0.398231	0.163	0.246882	0.481
	1071	Lib5	Ttem	GLYCOLYSIS	0.272204	0.168	0.1132	0.765
	1072	Lib5	Ttem	SYNTHESIS_OF_PIPS_AT_THE_EARLY_ENDOSOME_MEMBRANE	0.394978	0.17	0.191136	0.621
	1073	Lib5	Ttem	KERATAN_SULFATE_BIOSYNTHESIS	0.317378	0.176	0.182577	0.536
	1074	Lib5	Ttem	DRUG_METABOLISM_OTHER_ENZYMES	0.273433	0.186	0.205521	0.389
	1075	Lib5	Ttem	GLYOXYLATE_AND_DICARBOXYLATE_METABOLISM	0.324549	0.191	0.171776	0.6
	1076	Lib5	Ttem	GLYCOSYLPHOSPHATIDYLINOSITOL_GPI_ANCHOR_BIOSYNTHESIS	0.276603	0.202	0.28685	0.159
	1077	Lib5	Ttem	FRUCTOSE_AND_MANNOSE_METABOLISM	0.26332	0.206	0.128747	0.7
	1078	Lib5	Ttem	GLYCOLYSIS_GLUCONEOGENESIS	0.22757	0.206	0.151118	0.566
	1079	Lib5	Ttem	PURINE_CATABOLISM	0.353677	0.208	0.347406	0.243
	1080	Lib5	Ttem	RETINOL_METABOLISM	0.246369	0.209	0.219326	0.308
	1081	Lib5	Ttem	OXPHO_COMPLEX_III	0.509113	0.213	0.216361	0.646
	1082	Lib5	Ttem	KERATAN_SULFATE_DEGRADATION	0.470197	0.223	0.356875	0.396
	1083	Lib5	Ttem	GALACTOSE_METABOLISM	0.272383	0.231	0.0620589	0.901
	1084	Lib5	Ttem	REGULATION_OF_GLUCOKINASE_BY_GLUCOKINASE_REGULATORY_PROTEIN	0.542498	0.232	0.774144	0.042
	1085	Lib5	Ttem	KETOLYSIS	0.447724	0.239	0.674882	0.027
	1086	Lib5	Ttem	RIBOFLAVIN_METABOLISM	0.345337	0.246	0.387172	0.123
	1087	Lib5	Ttem	KETOGENESIS	0.396611	0.249	0.614449	0.056
	1088	Lib5	Ttem	OXYGEN_DEPENDENT_PROLINE_HYDROXYLATION_OF_HYPOXIA_INDUCIBLE_FACTOR_ALPHA	0.401143	0.264	0.628089	0.035
	1089	Lib5	Ttem	CHOLINE	0.286751	0.264	0.166729	0.591
	1090	Lib5	Ttem	GH_PATHWAY	0.356847	0.269	0.435174	0.149
	1091	Lib5	Ttem	PANTOTHENATE_AND_COA_BIOSYNTHESIS	0.295991	0.28	0.383452	0.115
	1092	Lib5	Ttem	GLUCOSE_METABOLISM	0.210105	0.284	0.053145	0.956
	1093	Lib5	Ttem	PURINE_METABOLISM	0.18019	0.291	0.157255	0.456
	1094	Lib5	Ttem	STEROID_HORMONE_BIOSYNTHESIS	0.227756	0.299	0.175058	0.482
	1095	Lib5	Ttem	KERATAN_SULFATE_KERATIN_METABOLISM	0.254614	0.307	0.127952	0.715
	1096	Lib5	Ttem	ALDOSTERONE_REGULATED_SODIUM_REABSORPTION	0.254481	0.309	0.173027	0.564
	1097	Lib5	Ttem	LIMONENE_AND_PINENE_DEGRADATION	0.320546	0.31	0.560913	0.023
	1098	Lib5	Ttem	SULFUR_METABOLISM	0.304688	0.312	0.200907	0.562
	1099	Lib5	Ttem	ANDROGEN_BIOSYNTHESIS	0.361297	0.313	0.43072	0.235
	1100	Lib5	Ttem	GLUTAMINOLYSIS	0.296933	0.347	0.153812	0.676
	1101	Lib5	Ttem	GLUCONEOGENESIS	0.214499	0.349	0.10541	0.791
	1102	Lib5	Ttem	ETHANOL_OXIDATION	0.298911	0.35	0.42095	0.187
	1103	Lib5	Ttem	BUTANOATE_METABOLISM	0.213863	0.357	0.404214	0.01
	1104	Lib5	Ttem	METABOLISM_OF_CARBOHYDRATES	0.162238	0.361	0.143251	0.519
	1105	Lib5	Ttem	NICOTINATE_AND_NICOTINAMIDE_METABOLISM	0.221491	0.374	0.378023	0.049
	1106	Lib5	Ttem	SYNTHESIS_OF_PE	0.287841	0.381	0.261513	0.414
	1107	Lib5	Ttem	SYNTHESIS_OF_PC	0.226639	0.395	0.257485	0.324
	1108	Lib5	Ttem	UNFOLDED_PROTEIN_RESPONSE	0.293274	0.409	0.452069	0.173
	1109	Lib5	Ttem	PGC1A_PATHWAY	0.389498	0.424	0.79552	0.028
	1110	Lib5	Ttem	PEROXISOME	0.202659	0.431	0.183966	0.49
	1111	Lib5	Ttem	PAR1_PATHWAY	0.27428	0.458	0.462718	0.149
	1112	Lib5	Ttem	PYRUVATE_METABOLISM	0.172575	0.459	0.293901	0.057
	1113	Lib5	Ttem	PYRIMIDINE_CATABOLISM	0.237361	0.465	0.44971	0.09
	1114	Lib5	Ttem	ACTIVATION_OF_KAINATE_RECEPTORS_UPON_GLUTAMATE_BINDING	0.238827	0.468	0.47711	0.064
	1115	Lib5	Ttem	SULFUR_AMINO_ACID_METABOLISM	0.19102	0.482	0.167302	0.594
	1116	Lib5	Ttem	HEPARAN_SULFATE_HEPARIN_HS_GAG_METABOLISM	0.181425	0.497	0.223964	0.302
	1117	Lib5	Ttem	BRANCHED_CHAIN_AMINO_ACID_CATABOLISM	0.206417	0.501	0.147672	0.671
	1118	Lib5	Ttem	LYSOSOME	0.157962	0.504	0.116891	0.744
	1119	Lib5	Ttem	REGULATION_OF_INSULIN_SECRETION_BY_ACETYLCHOLINE	0.267737	0.532	0.639827	0.029
	1120	Lib5	Ttem	SYNTHESIS_OF_BILE_ACIDS_AND_BILE_SALTS_VIA_24_HYDROXYCHOLESTEROL	0.208696	0.555	0.587859	0.008
	1121	Lib5	Ttem	MITOCHONDRIAL_FATTY_ACID_BETA_OXIDATION	0.191464	0.575	0.279616	0.316
	1122	Lib5	Ttem	PURINE_SALVAGE	0.183181	0.575	0.372416	0.145
	1123	Lib5	Ttem	VALINE_LEUCINE_AND_ISOLEUCINE_DEGRADATION	0.1491	0.583	0.309892	0.044
	1124	Lib5	Ttem	PEROXISOMAL_LIPID_METABOLISM	0.165513	0.587	0.387861	0.055
	1125	Lib5	Ttem	FATTY_ACID_TRIACYLGLYCEROL_AND_KETONE_BODY_METABOLISM	0.137643	0.597	0.2166	0.144
	1126	Lib5	Ttem	GLYCOGEN_BREAKDOWN_GLYCOGENOLYSIS	0.187422	0.605	0.404244	0.189
	1127	Lib5	Ttem	PRIMARY_BILE_ACID_BIOSYNTHESIS	0.169026	0.611	0.408712	0.064
	1128	Lib5	Ttem	PHOSPHOLIPID_METABOLISM	0.130214	0.624	0.200297	0.115
	1129	Lib5	Ttem	PTM_GAMMA_CARBOXYLATION_HYPUSINE_FORMATION_AND_ARYLSULFATASE_ACTIVATION	0.172761	0.628	0.432661	0.106
	1130	Lib5	Ttem	TRANSPORT_OF_VITAMINS_NUCLEOSIDES_AND_RELATED_MOLECULES	0.142747	0.646	0.264545	0.21
	1131	Lib5	Ttem	ABC_TRANSPORTERS	0.138758	0.649	0.240568	0.198
	1132	Lib5	Ttem	SYNTHESIS_OF_VERY_LONG_CHAIN_FATTY_ACYL_COAS	0.15591	0.665	0.298286	0.28
	1133	Lib5	Ttem	SYNTHESIS_OF_BILE_ACIDS_AND_BILE_SALTS_VIA_7ALPHA_HYDROXYCHOLESTEROL	0.15307	0.668	0.453662	0.031
	1134	Lib5	Ttem	SPHINGOLIPID_METABOLISM	0.131243	0.67	0.225181	0.216
	1135	Lib5	Ttem	BILE_SALT_AND_ORGANIC_ANION_SLC_TRANSPORTERS	0.158661	0.679	0.597104	0.008
	1136	Lib5	Ttem	NUCLEARRS_PATHWAY	0.166823	0.681	0.433859	0.085
	1137	Lib5	Ttem	METABOLISM_OF_POLYAMINES	0.149953	0.681	0.217658	0.492
	1138	Lib5	Ttem	CHYLOMICRON_MEDIATED_LIPID_TRANSPORT	0.150641	0.682	0.34538	0.211
	1139	Lib5	Ttem	TANDEM_PORE_DOMAIN_POTASSIUM_CHANNELS	0.147898	0.682	0.303285	0.325
	1140	Lib5	Ttem	METAL_ION_SLC_TRANSPORTERS	0.134403	0.696	0.289586	0.195
	1141	Lib5	Ttem	CYSTEINE_AND_METHIONINE_METABOLISM	0.131114	0.699	0.123174	0.725
	1142	Lib5	Ttem	BILE_ACID_AND_BILE_SALT_METABOLISM	0.130096	0.708	0.414981	0.026
	1143	Lib5	Ttem	PHENYLALANINE_METABOLISM	0.132036	0.712	0.283577	0.261
	1144	Lib5	Ttem	PASSIVE_TRANSPORT_BY_AQUAPORINS	0.143446	0.717	0.145902	0.732
	1145	Lib5	Ttem	FATTY_ACID_ACTIVATION_UPTAKE	0.134398	0.719	0.389526	0.139
	1146	Lib5	Ttem	TRYPTOPHAN_METABOLISM	0.120899	0.72	0.392351	0.008
	1147	Lib5	Ttem	SYNTHESIS_OF_BILE_ACIDS_AND_BILE_SALTS	0.126758	0.722	0.411442	0.044
	1148	Lib5	Ttem	BETA_OXIDATION	0.12954	0.725	0.453539	0.002
	1149	Lib5	Ttem	AMINE_COMPOUND_SLC_TRANSPORTERS	0.120657	0.73	0.197337	0.439
	1150	Lib5	Ttem	HYALURONAN_METABOLISM	0.137785	0.733	0.474012	0.04
	1151	Lib5	Ttem	METABOLISM_OF_LIPIDS_AND_LIPOPROTEINS	0.117027	0.746	0.187687	0.057
	1152	Lib5	Ttem	O_GLYCAN_BIOSYNTHESIS	0.113834	0.753	0.259728	0.239
	1153	Lib5	Ttem	LIPOPROTEIN_METABOLISM	0.112641	0.754	0.30759	0.209
	1154	Lib5	Ttem	REGULATION_OF_WATER_BALANCE_BY_RENAL_AQUAPORINS	0.111914	0.757	0.39526	0.063
	1155	Lib5	Ttem	INTEGRATION_OF_ENERGY_METABOLISM	0.112004	0.758	0.219115	0.293
	1156	Lib5	Ttem	GLUCOSE_TRANSPORT	0.121734	0.759	0.517404	0.014
	1157	Lib5	Ttem	NITROGEN_METABOLISM	0.108144	0.763	0.133537	0.684
	1158	Lib5	Ttem	HISTIDINE_METABOLISM	0.109598	0.769	0.365031	0.084
	1159	Lib5	Ttem	GLUTATHIONE_METABOLISM	0.110912	0.77	0.18166	0.437
	1160	Lib5	Ttem	GLYCINE_SERINE_AND_THREONINE_METABOLISM	0.10502	0.78	0.356717	0.036
	1161	Lib5	Ttem	METABOLISM_OF_STEROID_HORMONES_AND_VITAMINS_A_AND_D	0.101105	0.785	0.321114	0.109
	1162	Lib5	Ttem	LINOLEIC_ACID_METABOLISM	0.0981565	0.788	0.630447	0.001
	1163	Lib5	Ttem	ETHER_LIPID_METABOLISM	0.102528	0.792	0.456767	0.007
	1164	Lib5	Ttem	FATTY_ACID_METABOLISM	0.104322	0.794	0.299327	0.093
	1165	Lib5	Ttem	LIPID_DIGESTION_MOBILIZATION_AND_TRANSPORT	0.104278	0.799	0.301159	0.139
	1166	Lib5	Ttem	CHONDROITIN_SULFATE_DERMATAN_SULFATE_METABOLISM	0.101382	0.806	0.287547	0.144
	1167	Lib5	Ttem	TRIGLYCERIDE_BIOSYNTHESIS	0.0958972	0.808	0.247777	0.199
	1168	Lib5	Ttem	SYNTHESIS_OF_PA	0.0928266	0.809	0.418505	0.015
	1169	Lib5	Ttem	AQUAPORIN_MEDIATED_TRANSPORT	0.103416	0.814	0.306877	0.157
	1170	Lib5	Ttem	POLYAMINE_SYNTHESIS	0.107866	0.827	0.230999	0.595
	1171	Lib5	Ttem	PROLINE_DEGRADATION	0.100531	0.828	0.521982	0.202
	1172	Lib5	Ttem	AMINO_ACID_AND_OLIGOPEPTIDE_SLC_TRANSPORTERS	0.0910196	0.835	0.205038	0.332
	1173	Lib5	Ttem	O_LINKED_GLYCOSYLATION_OF_MUCINS	0.087718	0.84	0.234356	0.246
	1174	Lib5	Ttem	GLYCEROPHOSPHOLIPID_METABOLISM	0.0976586	0.842	0.22555	0.157
	1175	Lib5	Ttem	GLYCOSAMINOGLYCAN_METABOLISM	0.0934031	0.845	0.244939	0.086
	1176	Lib5	Ttem	ACYL_CHAIN_REMODELLING_OF_PC_PE_PG_PS	0.0908243	0.846	0.544439	0.001
	1177	Lib5	Ttem	ALPHA_LINOLENIC_ACID_METABOLISM	0.0880483	0.846	0.50052	0.004
	1178	Lib5	Ttem	BETA_ALANINE_METABOLISM	0.0818069	0.85	0.286402	0.19
	1179	Lib5	Ttem	TRYPTOPHAN_CATABOLISM	0.0777667	0.854	0.494028	0.069
	1180	Lib5	Ttem	NITRIC_OXIDE_STIMULATES_GUANYLATE_CYCLASE	0.0790832	0.855	0.438053	0.01
	1181	Lib5	Ttem	STEROID_BIOSYNTHESIS	0.07907	0.858	0.424165	0.054
	1182	Lib5	Ttem	VOLTAGE_GATED_POTASSIUM_CHANNELS	0.0770065	0.871	0.256083	0.174
	1183	Lib5	Ttem	AMINO_ACID_SYNTHESIS_AND_INTERCONVERSION_TRANSAMINATION	0.0719281	0.878	0.271136	0.326
	1184	Lib5	Ttem	TYROSINE_METABOLISM	0.0747037	0.89	0.328813	0.061
	1185	Lib5	Ttem	PPAR_SIGNALING_PATHWAY	0.0801736	0.891	0.282155	0.057
	1186	Lib5	Ttem	PROLINE_SYNTHESIS	0.0517585	0.891	0.58213	0.126
	1187	Lib5	Ttem	GLYCOSPHINGOLIPID_METABOLISM	0.0685295	0.893	0.279522	0.144
	1188	Lib5	Ttem	GLYCEROLIPID_METABOLISM	0.0734088	0.905	0.263704	0.149
	1189	Lib5	Ttem	GLYCEROPHOSPHOLIPID_BIOSYNTHESIS	0.0753894	0.914	0.301528	0.012
	1190	Lib5	Ttem	METABOLISM_OF_XENOBIOTICS_BY_CYTOCHROME_P450	0.0602066	0.929	0.238969	0.238
	1191	Lib5	Ttem	TAURINE_AND_HYPOTAURINE_METABOLISM	0.0392287	0.93	0.252413	0.434
	1192	Lib5	Ttem	OTHER_GLYCAN_DEGRADATION	0.0480189	0.931	0.264178	0.355
	1193	Lib5	Ttem	DRUG_METABOLISM_CYTOCHROME_P450	0.0557381	0.934	0.283946	0.089
	1194	Lib5	Ttem	ARGININE_AND_PROLINE_METABOLISM	0.0525253	0.945	0.173675	0.476
	1195	Lib5	Ttem	ION_CHANNEL_TRANSPORT	0.0459462	0.958	0.181756	0.415
	1196	Lib5	Ttem	ARACHIDONIC_ACID_METABOLISM	0.0430155	0.963	0.355816	0.007
	1197	Lib5	Ttem	POTASSIUM_CHANNELS	0.0408719	0.981	0.275607	0.03
	1198	Lib5	Ttem	TRANSMEMBRANE_TRANSPORT_OF_SMALL_MOLECULES	0.0616357	0.991	0.194256	0.03
	1199	Lib5	Ttem	TRANSPORT_OF_GLUCOSE_AND_OTHER_SUGARS_BILE_SALTS_AND_ORGANIC_ACIDS_METAL_IONS_AND_AMINE_COMPOUNDS	0.0233987	0.992	0.292611	0.008
	1200	Lib5	Ttem	SLC_MEDIATED_TRANSMEMBRANE_TRANSPORT	0.0268608	1	0.263921	0.001
	1201	Lib7	Tcm	PURINE_RIBONUCLEOSIDE_MONOPHOSPHATE_BIOSYNTHESIS	0.836517	0.001	0.113577	0.782
	1202	Lib7	Tcm	TRNA_AMINOACYLATION	0.823707	0.001	0.0331714	0.971
	1203	Lib7	Tcm	METABOLISM_OF_RNA	0.812236	0.001	0.0428239	0.951
	1204	Lib7	Tcm	SYNTHESIS_OF_DNA	0.812236	0.001	0.0428239	0.953
	1205	Lib7	Tcm	METABOLISM_OF_MRNA	0.812236	0.001	0.0428239	0.955
	1206	Lib7	Tcm	AMINOACYL_TRNA_BIOSYNTHESIS	0.803005	0.001	0.0341211	0.977
	1207	Lib7	Tcm	PENTOSE_PHOSPHATE	0.793252	0.001	0.110833	0.806
	1208	Lib7	Tcm	OXPHO_COMPLEX_V	0.757612	0.001	0.127443	0.74
	1209	Lib7	Tcm	TERPENOID_BACKBONE_BIOSYNTHESIS	0.746238	0.001	0.116875	0.782
	1210	Lib7	Tcm	REGULATION_OF_ORNITHINE_DECARBOXYLASE_ODC	0.724683	0.001	0.037464	0.957
	1211	Lib7	Tcm	RESPIRATORY_ELECTRON_TRANSPORT	0.641614	0.001	0.0446157	0.955
	1212	Lib7	Tcm	SYNTHESIS_AND_INTERCONVERSION_OF_NUCLEOTIDE_DI_AND_TRIPHOSPHATES	0.614137	0.001	0.0938171	0.811
	1213	Lib7	Tcm	OXPHO_COMPLEX_I	0.580345	0.001	0.056507	0.93
	1214	Lib7	Tcm	TCA_CYCLE_AND_RESPIRATORY_ELECTRON_TRANSPORT	0.552315	0.001	0.0251939	0.996
	1215	Lib7	Tcm	OXIDATIVE_PHOSPHORYLATION	0.547619	0.001	0.0250356	0.996
	1216	Lib7	Tcm	CHOLESTEROGENESIS	0.533565	0.001	0.0792264	0.855
	1217	Lib7	Tcm	METABOLISM_OF_NUCLEOTIDES	0.360027	0.001	0.0856656	0.87
	1218	Lib7	Tcm	OXPHO_COMPLEX_II	0.874917	0.002	0.0202389	0.964
	1219	Lib7	Tcm	REGULATION_OF_AUTOPHAGY	0.866693	0.002	0.310277	0.482
	1220	Lib7	Tcm	SYNTHESIS_OF_PIPS_AT_THE_EARLY_ENDOSOME_MEMBRANE	0.635132	0.003	0.192747	0.602
	1221	Lib7	Tcm	PYRUVATE_METABOLISM_AND_CITRIC_ACID_TCA_CYCLE	0.424139	0.004	0.183201	0.444
	1222	Lib7	Tcm	VALINE_LEUCINE_AND_ISOLEUCINE_BIOSYNTHESIS	0.614102	0.005	0.0250858	0.951
	1223	Lib7	Tcm	TCA_CYCLE	0.432042	0.006	0.192717	0.463
	1224	Lib7	Tcm	IRON_UPTAKE_AND_TRANSPORT	0.415773	0.006	0.0756743	0.882
	1225	Lib7	Tcm	PORPHYRIN_AND_CHLOROPHYLL_METABOLISM	0.416558	0.007	0.097306	0.802
	1226	Lib7	Tcm	METABOLISM_OF_PROTEINS	0.258053	0.007	0.133425	0.642
	1227	Lib7	Tcm	N_GLYCAN_BIOSYNTHESIS	0.36286	0.011	0.09477	0.812
	1228	Lib7	Tcm	METABOLISM_OF_AMINO_ACIDS_AND_DERIVATIVES	0.252796	0.011	0.0499434	0.986
	1229	Lib7	Tcm	OXPHO_COMPLEX_IV	0.467163	0.015	0.119097	0.744
	1230	Lib7	Tcm	METABOLISM_OF_VITAMINS_AND_COFACTORS	0.326545	0.017	0.0388066	0.964
	1231	Lib7	Tcm	SYNTHESIS_OF_PIPS_AT_THE_GOLGI_MEMBRANE	0.475662	0.018	0.130013	0.731
	1232	Lib7	Tcm	LYSOSOME_VESICLE_BIOGENESIS	0.810722	0.024	0.453917	0.376
	1233	Lib7	Tcm	PGC1A_PATHWAY	0.805281	0.027	0.542888	0.256
	1234	Lib7	Tcm	SYNTHESIS_OF_PIPS_AT_THE_LATE_ENDOSOME_MEMBRANE	0.669006	0.028	0.221887	0.593
	1235	Lib7	Tcm	ASPARAGINE_N_LINKED_GLYCOSYLATION	0.299118	0.031	0.144409	0.597
	1236	Lib7	Tcm	VITAMIN_B5_PANTOTHENATE_METABOLISM	0.508544	0.039	0.00764882	0.989
	1237	Lib7	Tcm	METABOLISM_OF_PORPHYRINS	0.439729	0.054	0.0332889	0.94
	1238	Lib7	Tcm	ONE_CARBON_POOL_BY_FOLATE	0.390678	0.067	0.280074	0.287
	1239	Lib7	Tcm	ACTIVATION_OF_GENES_BY_ATF4	0.802072	0.071	0.81949	0.059
	1240	Lib7	Tcm	SGOCP_ALL	0.257689	0.074	0.108229	0.789
	1241	Lib7	Tcm	KETOGENESIS	0.554602	0.076	0.369432	0.319
	1242	Lib7	Tcm	AMINO_SUGAR_AND_NUCLEOTIDE_SUGAR_METABOLISM	0.294421	0.079	0.164449	0.519
	1243	Lib7	Tcm	GLYCOLYSIS	0.313895	0.087	0.192612	0.459
	1244	Lib7	Tcm	SELENOAMINO_ACID_METABOLISM	0.372117	0.088	0.0948238	0.826
	1245	Lib7	Tcm	POLYAMINE_SYNTHESIS	0.586189	0.089	0.278854	0.535
	1246	Lib7	Tcm	CERAMIDE_PATHWAY	0.565169	0.091	0.267927	0.483
	1247	Lib7	Tcm	OXPHO_COMPLEX_III	0.625904	0.094	0.13002	0.781
	1248	Lib7	Tcm	LYSINE_DEGRADATION	0.3378	0.096	0.114113	0.75
	1249	Lib7	Tcm	SYNTHESIS_OF_SUBSTRATES_IN_N_GLYCAN_BIOSYTHESIS	0.388002	0.104	0.343122	0.177
	1250	Lib7	Tcm	TERMINATION_OF_O_GLYCAN_BIOSYNTHESIS	0.486521	0.106	0.253683	0.462
	1251	Lib7	Tcm	CYSTEINE_AND_METHIONINE_METABOLISM	0.310562	0.109	0.0846061	0.836
	1252	Lib7	Tcm	GOLGI_ASSOCIATED_VESICLE_BIOGENESIS	0.571511	0.113	0.348652	0.383
	1253	Lib7	Tcm	PANTOTHENATE_AND_COA_BIOSYNTHESIS	0.381177	0.117	0.139853	0.675
	1254	Lib7	Tcm	UNFOLDED_PROTEIN_RESPONSE	0.486524	0.12	0.411785	0.197
	1255	Lib7	Tcm	O_GLYCAN_BIOSYNTHESIS	0.308793	0.125	0.144486	0.652
	1256	Lib7	Tcm	METABOLISM_OF_POLYAMINES	0.375855	0.131	0.21443	0.476
	1257	Lib7	Tcm	ENDOCYTOSIS	0.59317	0.141	0.434514	0.273
	1258	Lib7	Tcm	FOLATE_BIOSYNTHESIS	0.442614	0.146	0.389966	0.21
	1259	Lib7	Tcm	PEROXISOMAL_LIPID_METABOLISM	0.322808	0.147	0.108683	0.759
	1260	Lib7	Tcm	CHYLOMICRON_MEDIATED_LIPID_TRANSPORT	0.376664	0.157	0.202287	0.554
	1261	Lib7	Tcm	REGULATION_OF_GLUCOKINASE_BY_GLUCOKINASE_REGULATORY_PROTEIN	0.633047	0.158	0.802712	0.041
	1262	Lib7	Tcm	ADVANCED_GLYCOSYLATION_ENDPRODUCT_RECEPTOR_SIGNALING	0.719496	0.16	0.742864	0.128
	1263	Lib7	Tcm	TRYPTOPHAN_METABOLISM	0.265847	0.161	0.124884	0.712
	1264	Lib7	Tcm	O_LINKED_GLYCOSYLATION_OF_MUCINS	0.26123	0.163	0.171022	0.49
	1265	Lib7	Tcm	PHENYLALANINE_METABOLISM	0.331924	0.165	0.27392	0.285
	1266	Lib7	Tcm	GLYCOLYSIS_GLUCONEOGENESIS	0.236803	0.166	0.166785	0.471
	1267	Lib7	Tcm	SYNTHESIS_OF_BILE_ACIDS_AND_BILE_SALTS_VIA_7ALPHA_HYDROXYCHOLESTEROL	0.327007	0.173	0.236137	0.392
	1268	Lib7	Tcm	FRUCTOSE_AND_MANNOSE_METABOLISM	0.273203	0.178	0.267706	0.177
	1269	Lib7	Tcm	GLUCURONIDATION	0.400335	0.184	0.28701	0.399
	1270	Lib7	Tcm	ETHANOL_OXIDATION	0.410091	0.185	0.414098	0.188
	1271	Lib7	Tcm	POST_TRANSLATIONAL_MODIFICATION_SYNTHESIS_OF_GPI_ANCHORED_PROTEINS	0.288195	0.194	0.372446	0.051
	1272	Lib7	Tcm	GLYCOGEN_BREAKDOWN_GLYCOGENOLYSIS	0.386038	0.199	0.265695	0.45
	1273	Lib7	Tcm	KERATAN_SULFATE_BIOSYNTHESIS	0.303329	0.199	0.241071	0.375
	1274	Lib7	Tcm	GLUTATHIONE_METABOLISM	0.238557	0.209	0.0866511	0.862
	1275	Lib7	Tcm	PYRIMIDINE_METABOLISM	0.231047	0.211	0.224398	0.222
	1276	Lib7	Tcm	GLYCOSYLPHOSPHATIDYLINOSITOL_GPI_ANCHOR_BIOSYNTHESIS	0.270106	0.212	0.287396	0.174
	1277	Lib7	Tcm	PENTOSE_AND_GLUCURONATE_INTERCONVERSIONS	0.317254	0.215	0.264949	0.337
	1278	Lib7	Tcm	GLUCOSE_METABOLISM	0.230298	0.216	0.196172	0.363
	1279	Lib7	Tcm	LIPOGENESIS	0.242906	0.219	0.235283	0.235
	1280	Lib7	Tcm	GLUTAMINOLYSIS	0.322526	0.234	0.122351	0.776
	1281	Lib7	Tcm	PYRUVATE_to_ACETYL_coA	0.429908	0.248	0.550382	0.116
	1282	Lib7	Tcm	GLUCONEOGENESIS	0.238113	0.248	0.209609	0.373
	1283	Lib7	Tcm	ETHER_LIPID_METABOLISM	0.259455	0.25	0.13356	0.672
	1284	Lib7	Tcm	ALANINE_ASPARTATE_AND_GLUTAMATE_METABOLISM	0.234111	0.264	0.226626	0.296
	1285	Lib7	Tcm	GH_PATHWAY	0.352592	0.268	0.535847	0.047
	1286	Lib7	Tcm	IONOTROPIC_ACTIVITY_OF_KAINATE_RECEPTORS	0.390152	0.274	0.565286	0.061
	1287	Lib7	Tcm	TRANSPORT_OF_VITAMINS_NUCLEOSIDES_AND_RELATED_MOLECULES	0.24004	0.281	0.0944936	0.807
	1288	Lib7	Tcm	ABACAVIR_TRANSPORT_AND_METABOLISM	0.323524	0.285	0.313584	0.329
	1289	Lib7	Tcm	PEROXISOME	0.234205	0.286	0.107749	0.763
	1290	Lib7	Tcm	PTM_GAMMA_CARBOXYLATION_HYPUSINE_FORMATION_AND_ARYLSULFATASE_ACTIVATION	0.320177	0.301	0.376697	0.173
	1291	Lib7	Tcm	RETINOL_METABOLISM	0.217084	0.308	0.199102	0.39
	1292	Lib7	Tcm	BETA_OXIDATION	0.223867	0.318	0.338711	0.053
	1293	Lib7	Tcm	KERATAN_SULFATE_KERATIN_METABOLISM	0.244746	0.325	0.239782	0.34
	1294	Lib7	Tcm	LACTATE_GENERATION	0.464476	0.328	0.159768	0.746
	1295	Lib7	Tcm	SYNTHESIS_OF_BILE_ACIDS_AND_BILE_SALTS	0.249623	0.336	0.297516	0.2
	1296	Lib7	Tcm	GLYOXYLATE_AND_DICARBOXYLATE_METABOLISM	0.260029	0.34	0.221491	0.469
	1297	Lib7	Tcm	HIF_PATHWAY	0.32717	0.342	0.590196	0.051
	1298	Lib7	Tcm	DRUG_METABOLISM_CYTOCHROME_P450	0.202238	0.347	0.290042	0.071
	1299	Lib7	Tcm	REGULATION_OF_HYPOXIA_INDUCIBLE_FACTOR_HIF_BY_OXYGEN	0.288964	0.366	0.462797	0.102
	1300	Lib7	Tcm	ABC_TRANSPORTERS	0.195838	0.37	0.225371	0.278
	1301	Lib7	Tcm	METABOLISM_OF_CARBOHYDRATES	0.161514	0.374	0.129556	0.661
	1302	Lib7	Tcm	RIBOFLAVIN_METABOLISM	0.27764	0.379	0.227557	0.497
	1303	Lib7	Tcm	BETA_ALANINE_METABOLISM	0.229959	0.382	0.255078	0.312
	1304	Lib7	Tcm	CHREBP2_PATHWAY	0.333149	0.383	0.633071	0.041
	1305	Lib7	Tcm	PROPANOATE_METABOLISM	0.197935	0.387	0.306385	0.105
	1306	Lib7	Tcm	SYNTHESIS_OF_BILE_ACIDS_AND_BILE_SALTS_VIA_24_HYDROXYCHOLESTEROL	0.275652	0.391	0.49095	0.053
	1307	Lib7	Tcm	SPHINGOLIPID_DE_NOVO_BIOSYNTHESIS	0.222368	0.394	0.226627	0.403
	1308	Lib7	Tcm	BILE_SALT_AND_ORGANIC_ANION_SLC_TRANSPORTERS	0.27801	0.399	0.333418	0.256
	1309	Lib7	Tcm	KERATAN_SULFATE_DEGRADATION	0.334812	0.402	0.685732	0.029
	1310	Lib7	Tcm	SULFUR_AMINO_ACID_METABOLISM	0.221348	0.405	0.112523	0.763
	1311	Lib7	Tcm	LIMONENE_AND_PINENE_DEGRADATION	0.274055	0.421	0.444077	0.126
	1312	Lib7	Tcm	LIPOPROTEIN_METABOLISM	0.218161	0.422	0.251657	0.351
	1313	Lib7	Tcm	ANDROGEN_BIOSYNTHESIS	0.29697	0.427	0.55286	0.092
	1314	Lib7	Tcm	GLUCOSE_TRANSPORT	0.240872	0.429	0.200633	0.497
	1315	Lib7	Tcm	KETOLYSIS	0.314489	0.431	0.658436	0.045
	1316	Lib7	Tcm	METAL_ION_SLC_TRANSPORTERS	0.211998	0.433	0.026458	0.972
	1317	Lib7	Tcm	DIGESTION_OF_DIETARY_CARBOHYDRATE	0.319497	0.437	0.063392	0.903
	1318	Lib7	Tcm	BILE_ACID_AND_BILE_SALT_METABOLISM	0.197951	0.453	0.231689	0.331
	1319	Lib7	Tcm	PURINE_METABOLISM	0.155906	0.463	0.135038	0.603
	1320	Lib7	Tcm	VALINE_LEUCINE_AND_ISOLEUCINE_DEGRADATION	0.176298	0.47	0.255125	0.161
	1321	Lib7	Tcm	PROLINE_SYNTHESIS	0.325578	0.473	0.130392	0.787
	1322	Lib7	Tcm	SYNTHESIS_OF_VERY_LONG_CHAIN_FATTY_ACYL_COAS	0.212716	0.486	0.290794	0.311
	1323	Lib7	Tcm	PYRUVATE_METABOLISM	0.177278	0.491	0.261799	0.12
	1324	Lib7	Tcm	NITRIC_OXIDE_STIMULATES_GUANYLATE_CYCLASE	0.189271	0.499	0.218638	0.423
	1325	Lib7	Tcm	HYALURONAN_METABOLISM	0.215915	0.503	0.338404	0.212
	1326	Lib7	Tcm	TYROSINE_METABOLISM	0.180369	0.506	0.351222	0.037
	1327	Lib7	Tcm	CHONDROITIN_SULFATE_DERMATAN_SULFATE_METABOLISM	0.175895	0.513	0.319574	0.07
	1328	Lib7	Tcm	FATTY_ACID_METABOLISM	0.177742	0.514	0.378918	0.018
	1329	Lib7	Tcm	PRIMARY_BILE_ACID_BIOSYNTHESIS	0.199468	0.515	0.367046	0.105
	1330	Lib7	Tcm	SYNTHESIS_OF_PC	0.193168	0.515	0.224088	0.419
	1331	Lib7	Tcm	REGULATION_OF_PYRUVATE_DEHYDROGENASE_PDH_COMPLEX	0.219081	0.519	0.708849	0.001
	1332	Lib7	Tcm	OXYGEN_DEPENDENT_PROLINE_HYDROXYLATION_OF_HYPOXIA_INDUCIBLE_FACTOR_ALPHA	0.258919	0.536	0.715274	0.01
	1333	Lib7	Tcm	STEROID_BIOSYNTHESIS	0.189654	0.536	0.179933	0.581
	1334	Lib7	Tcm	PYRIMIDINE_CATABOLISM	0.209901	0.542	0.452238	0.081
	1335	Lib7	Tcm	REGULATION_OF_INSULIN_SECRETION_BY_ACETYLCHOLINE	0.237268	0.548	0.643311	0.027
	1336	Lib7	Tcm	SYNTHESIS_OF_PE	0.200465	0.548	0.205611	0.543
	1337	Lib7	Tcm	BUTANOATE_METABOLISM	0.167162	0.554	0.270982	0.151
	1338	Lib7	Tcm	HISTIDINE_METABOLISM	0.179605	0.556	0.281819	0.239
	1339	Lib7	Tcm	CHOLINE	0.178465	0.563	0.256274	0.358
	1340	Lib7	Tcm	INTEGRATION_OF_ENERGY_METABOLISM	0.158357	0.566	0.303105	0.056
	1341	Lib7	Tcm	REGULATION_OF_WATER_BALANCE_BY_RENAL_AQUAPORINS	0.177054	0.568	0.446248	0.028
	1342	Lib7	Tcm	ACTIVATION_OF_KAINATE_RECEPTORS_UPON_GLUTAMATE_BINDING	0.195658	0.572	0.443288	0.088
	1343	Lib7	Tcm	FATTY_ACID_ACTIVATION_UPTAKE	0.184726	0.574	0.234945	0.458
	1344	Lib7	Tcm	NICOTINATE_AND_NICOTINAMIDE_METABOLISM	0.164953	0.586	0.287388	0.2
	1345	Lib7	Tcm	BIOSYNTHESIS_OF_UNSATURATED_FATTY_ACIDS	0.176488	0.59	0.306555	0.206
	1346	Lib7	Tcm	TRYPTOPHAN_CATABOLISM	0.199424	0.596	0.329345	0.291
	1347	Lib7	Tcm	NUCLEARRS_PATHWAY	0.173157	0.608	0.354097	0.198
	1348	Lib7	Tcm	PURINE_CATABOLISM	0.172613	0.625	0.401376	0.144
	1349	Lib7	Tcm	PURINE_SALVAGE	0.163935	0.631	0.265127	0.347
	1350	Lib7	Tcm	DRUG_METABOLISM_OTHER_ENZYMES	0.149136	0.636	0.169465	0.531
	1351	Lib7	Tcm	GLYCEROPHOSPHOLIPID_METABOLISM	0.131876	0.642	0.115999	0.716
	1352	Lib7	Tcm	ASCORBATE_AND_ALDARATE_METABOLISM	0.156986	0.646	0.516431	0.017
	1353	Lib7	Tcm	GLYCINE_SERINE_AND_THREONINE_METABOLISM	0.138241	0.649	0.16235	0.565
	1354	Lib7	Tcm	PPAR_SIGNALING_PATHWAY	0.131952	0.665	0.198459	0.331
	1355	Lib7	Tcm	PAR1_PATHWAY	0.18394	0.671	0.765531	0.003
	1356	Lib7	Tcm	STARCH_AND_SUCROSE_METABOLISM	0.139057	0.671	0.146556	0.621
	1357	Lib7	Tcm	OTHER_GLYCAN_DEGRADATION	0.14557	0.672	0.204197	0.511
	1358	Lib7	Tcm	HEPARAN_SULFATE_HEPARIN_HS_GAG_METABOLISM	0.145966	0.673	0.222984	0.304
	1359	Lib7	Tcm	TANDEM_PORE_DOMAIN_POTASSIUM_CHANNELS	0.146325	0.705	0.37858	0.158
	1360	Lib7	Tcm	LYSOSOME	0.125815	0.706	0.158607	0.511
	1361	Lib7	Tcm	INOSITOL_PHOSPHATE_METABOLISM	0.12387	0.71	0.325949	0.012
	1362	Lib7	Tcm	GLYCEROPHOSPHOLIPID_BIOSYNTHESIS	0.119776	0.716	0.173279	0.41
	1363	Lib7	Tcm	BRANCHED_CHAIN_AMINO_ACID_CATABOLISM	0.127754	0.727	0.199141	0.489
	1364	Lib7	Tcm	METABOLISM_OF_XENOBIOTICS_BY_CYTOCHROME_P450	0.118647	0.729	0.273334	0.119
	1365	Lib7	Tcm	GALACTOSE_METABOLISM	0.118795	0.743	0.15899	0.609
	1366	Lib7	Tcm	LINOLEIC_ACID_METABOLISM	0.113154	0.743	0.299689	0.185
	1367	Lib7	Tcm	ALPHA_LINOLENIC_ACID_METABOLISM	0.116189	0.744	0.2295	0.329
	1368	Lib7	Tcm	TAURINE_AND_HYPOTAURINE_METABOLISM	0.124003	0.745	0.130984	0.755
	1369	Lib7	Tcm	PROLINE_DEGRADATION	0.158593	0.751	0.310434	0.481
	1370	Lib7	Tcm	SPHINGOLIPID_METABOLISM	0.110704	0.755	0.264445	0.088
	1371	Lib7	Tcm	GLYCOSPHINGOLIPID_METABOLISM	0.114554	0.759	0.404002	0.011
	1372	Lib7	Tcm	AQUAPORIN_MEDIATED_TRANSPORT	0.116941	0.767	0.382751	0.052
	1373	Lib7	Tcm	SULFUR_METABOLISM	0.0993568	0.799	0.246926	0.438
	1374	Lib7	Tcm	SYNTHESIS_OF_PA	0.103812	0.8	0.188152	0.53
	1375	Lib7	Tcm	TRIGLYCERIDE_BIOSYNTHESIS	0.102996	0.8	0.337516	0.042
	1376	Lib7	Tcm	MITOCHONDRIAL_FATTY_ACID_BETA_OXIDATION	0.0870289	0.812	0.518275	0.015
	1377	Lib7	Tcm	GLYCOSAMINOGLYCAN_METABOLISM	0.101666	0.817	0.196595	0.279
	1378	Lib7	Tcm	FATTY_ACID_TRIACYLGLYCEROL_AND_KETONE_BODY_METABOLISM	0.0944592	0.848	0.247455	0.071
	1379	Lib7	Tcm	PASSIVE_TRANSPORT_BY_AQUAPORINS	0.0790703	0.853	0.449132	0.098
	1380	Lib7	Tcm	LIPID_DIGESTION_MOBILIZATION_AND_TRANSPORT	0.0830661	0.856	0.26576	0.232
	1381	Lib7	Tcm	ALDOSTERONE_REGULATED_SODIUM_REABSORPTION	0.0735775	0.866	0.52997	0.002
	1382	Lib7	Tcm	SYNTHESIS_OF_PIPS_AT_THE_PLASMA_MEMBRANE	0.0746037	0.873	0.383558	0.026
	1383	Lib7	Tcm	ACYL_CHAIN_REMODELLING_OF_PC_PE_PG_PS	0.0752718	0.877	0.320134	0.094
	1384	Lib7	Tcm	METABOLISM_OF_STEROID_HORMONES_AND_VITAMINS_A_AND_D	0.0787798	0.884	0.445209	0.01
	1385	Lib7	Tcm	AMINO_ACID_SYNTHESIS_AND_INTERCONVERSION_TRANSAMINATION	0.0519481	0.902	0.333666	0.185
	1386	Lib7	Tcm	STEROID_HORMONE_BIOSYNTHESIS	0.0644438	0.913	0.379689	0.014
	1387	Lib7	Tcm	ARACHIDONIC_ACID_METABOLISM	0.0653733	0.916	0.273643	0.082
	1388	Lib7	Tcm	TRANSPORT_OF_GLUCOSE_AND_OTHER_SUGARS_BILE_SALTS_AND_ORGANIC_ACIDS_METAL_IONS_AND_AMINE_COMPOUNDS	0.0672567	0.942	0.210557	0.159
	1389	Lib7	Tcm	GLYCEROLIPID_METABOLISM	0.0549559	0.951	0.26136	0.136
	1390	Lib7	Tcm	ARGININE_AND_PROLINE_METABOLISM	0.0449845	0.954	0.26123	0.107
	1391	Lib7	Tcm	ION_CHANNEL_TRANSPORT	0.0388581	0.958	0.381486	0.001
	1392	Lib7	Tcm	AMINE_COMPOUND_SLC_TRANSPORTERS	0.0297559	0.958	0.427293	0.008
	1393	Lib7	Tcm	METABOLISM_OF_LIPIDS_AND_LIPOPROTEINS	0.0840985	0.962	0.203316	0.023
	1394	Lib7	Tcm	PHOSPHOLIPID_METABOLISM	0.0678806	0.963	0.2047	0.101
	1395	Lib7	Tcm	NITROGEN_METABOLISM	0.0163551	0.978	0.374876	0.053
	1396	Lib7	Tcm	AMINO_ACID_AND_OLIGOPEPTIDE_SLC_TRANSPORTERS	0.0276187	0.98	0.317221	0.031
	1397	Lib7	Tcm	POTASSIUM_CHANNELS	0.0264778	0.98	0.331311	0.001
	1398	Lib7	Tcm	TRANSMEMBRANE_TRANSPORT_OF_SMALL_MOLECULES	0.0618311	0.994	0.211975	0.01
	1399	Lib7	Tcm	VOLTAGE_GATED_POTASSIUM_CHANNELS	0.0110924	0.995	0.433336	0.001
	1400	Lib7	Tcm	SLC_MEDIATED_TRANSMEMBRANE_TRANSPORT	0.041667	0.999	0.213694	0.04
	1401	Lib7	Tem_liver	LYSOSOME_VESICLE_BIOGENESIS	0.922135	0.001	0.45242	0.343
	1402	Lib7	Tem_liver	PURINE_RIBONUCLEOSIDE_MONOPHOSPHATE_BIOSYNTHESIS	0.856656	0.001	0.118425	0.791
	1403	Lib7	Tem_liver	METABOLISM_OF_MRNA	0.854041	0.001	0.0434514	0.93
	1404	Lib7	Tem_liver	SYNTHESIS_OF_DNA	0.854041	0.001	0.0434514	0.945
	1405	Lib7	Tem_liver	METABOLISM_OF_RNA	0.854041	0.001	0.0434514	0.95
	1406	Lib7	Tem_liver	AMINOACYL_TRNA_BIOSYNTHESIS	0.820381	0.001	0.0331005	0.971
	1407	Lib7	Tem_liver	REGULATION_OF_ORNITHINE_DECARBOXYLASE_ODC	0.816148	0.001	0.0384478	0.96
	1408	Lib7	Tem_liver	TRNA_AMINOACYLATION	0.810243	0.001	0.0317682	0.971
	1409	Lib7	Tem_liver	VALINE_LEUCINE_AND_ISOLEUCINE_BIOSYNTHESIS	0.778242	0.001	0.00565348	0.991
	1410	Lib7	Tem_liver	TERPENOID_BACKBONE_BIOSYNTHESIS	0.730136	0.001	0.12777	0.737
	1411	Lib7	Tem_liver	OXPHO_COMPLEX_I	0.709965	0.001	0.054693	0.916
	1412	Lib7	Tem_liver	RESPIRATORY_ELECTRON_TRANSPORT	0.688125	0.001	0.0282282	0.976
	1413	Lib7	Tem_liver	OXPHO_COMPLEX_V	0.675091	0.001	0.174862	0.616
	1414	Lib7	Tem_liver	TCA_CYCLE_AND_RESPIRATORY_ELECTRON_TRANSPORT	0.61517	0.001	0.0301767	0.992
	1415	Lib7	Tem_liver	OXIDATIVE_PHOSPHORYLATION	0.60902	0.001	0.014862	0.998
	1416	Lib7	Tem_liver	N_GLYCAN_BIOSYNTHESIS	0.48775	0.001	0.067095	0.911
	1417	Lib7	Tem_liver	ASPARAGINE_N_LINKED_GLYCOSYLATION	0.479475	0.001	0.0663359	0.93
	1418	Lib7	Tem_liver	IRON_UPTAKE_AND_TRANSPORT	0.476103	0.001	0.149621	0.621
	1419	Lib7	Tem_liver	METABOLISM_OF_AMINO_ACIDS_AND_DERIVATIVES	0.345582	0.001	0.027872	0.995
	1420	Lib7	Tem_liver	METABOLISM_OF_PROTEINS	0.331576	0.001	0.102962	0.815
	1421	Lib7	Tem_liver	REGULATION_OF_AUTOPHAGY	0.88017	0.001	0.296562	0.496
	1422	Lib7	Tem_liver	ONE_CARBON_POOL_BY_FOLATE	0.543199	0.001	0.204418	0.49
	1423	Lib7	Tem_liver	PYRUVATE_METABOLISM_AND_CITRIC_ACID_TCA_CYCLE	0.505685	0.001	0.10392	0.772
	1424	Lib7	Tem_liver	SGOCP_ALL	0.38136	0.001	0.0459756	0.958
	1425	Lib7	Tem_liver	METABOLISM_OF_VITAMINS_AND_COFACTORS	0.370974	0.001	0.0604399	0.931
	1426	Lib7	Tem_liver	OXPHO_COMPLEX_II	0.863636	0.003	0.0192435	0.97
	1427	Lib7	Tem_liver	PENTOSE_PHOSPHATE	0.742487	0.003	0.0584961	0.903
	1428	Lib7	Tem_liver	SYNTHESIS_OF_SUBSTRATES_IN_N_GLYCAN_BIOSYTHESIS	0.601583	0.003	0.218384	0.453
	1429	Lib7	Tem_liver	OXPHO_COMPLEX_IV	0.548011	0.004	0.0959418	0.827
	1430	Lib7	Tem_liver	LACTATE_GENERATION	0.859448	0.006	0.0145937	0.977
	1431	Lib7	Tem_liver	METABOLISM_OF_NUCLEOTIDES	0.340551	0.006	0.0571027	0.942
	1432	Lib7	Tem_liver	ADVANCED_GLYCOSYLATION_ENDPRODUCT_RECEPTOR_SIGNALING	0.942971	0.007	0.534715	0.356
	1433	Lib7	Tem_liver	TCA_CYCLE	0.433051	0.009	0.098947	0.812
	1434	Lib7	Tem_liver	CYSTEINE_AND_METHIONINE_METABOLISM	0.423965	0.011	0.0705094	0.894
	1435	Lib7	Tem_liver	SYNTHESIS_AND_INTERCONVERSION_OF_NUCLEOTIDE_DI_AND_TRIPHOSPHATES	0.491092	0.013	0.109846	0.754
	1436	Lib7	Tem_liver	CHOLESTEROGENESIS	0.456314	0.015	0.177999	0.581
	1437	Lib7	Tem_liver	PORPHYRIN_AND_CHLOROPHYLL_METABOLISM	0.397762	0.016	0.130015	0.707
	1438	Lib7	Tem_liver	SYNTHESIS_OF_PIPS_AT_THE_GOLGI_MEMBRANE	0.461804	0.025	0.222427	0.462
	1439	Lib7	Tem_liver	AMINO_SUGAR_AND_NUCLEOTIDE_SUGAR_METABOLISM	0.343116	0.027	0.131345	0.666
	1440	Lib7	Tem_liver	CERAMIDE_PATHWAY	0.653526	0.028	0.217539	0.592
	1441	Lib7	Tem_liver	BILE_SALT_AND_ORGANIC_ANION_SLC_TRANSPORTERS	0.533686	0.029	0.237913	0.488
	1442	Lib7	Tem_liver	PGC1A_PATHWAY	0.795101	0.032	0.859379	0.005
	1443	Lib7	Tem_liver	ABACAVIR_TRANSPORT_AND_METABOLISM	0.540731	0.032	0.173068	0.616
	1444	Lib7	Tem_liver	FOLATE_BIOSYNTHESIS	0.570791	0.035	0.214723	0.569
	1445	Lib7	Tem_liver	GLYOXYLATE_AND_DICARBOXYLATE_METABOLISM	0.435706	0.039	0.241558	0.375
	1446	Lib7	Tem_liver	ACTIVATION_OF_GENES_BY_ATF4	0.857759	0.044	0.557834	0.355
	1447	Lib7	Tem_liver	ALANINE_ASPARTATE_AND_GLUTAMATE_METABOLISM	0.339363	0.048	0.203387	0.367
	1448	Lib7	Tem_liver	POLYAMINE_SYNTHESIS	0.648053	0.051	0.0839188	0.859
	1449	Lib7	Tem_liver	PANTOTHENATE_AND_COA_BIOSYNTHESIS	0.427931	0.054	0.274332	0.314
	1450	Lib7	Tem_liver	SYNTHESIS_OF_PIPS_AT_THE_LATE_ENDOSOME_MEMBRANE	0.596522	0.058	0.278917	0.483
	1451	Lib7	Tem_liver	KERATAN_SULFATE_BIOSYNTHESIS	0.380501	0.068	0.184084	0.546
	1452	Lib7	Tem_liver	OXPHO_COMPLEX_III	0.670449	0.072	0.20642	0.637
	1453	Lib7	Tem_liver	PYRIMIDINE_METABOLISM	0.283979	0.072	0.137729	0.613
	1454	Lib7	Tem_liver	SELENOAMINO_ACID_METABOLISM	0.363122	0.075	0.217253	0.438
	1455	Lib7	Tem_liver	POST_TRANSLATIONAL_MODIFICATION_SYNTHESIS_OF_GPI_ANCHORED_PROTEINS	0.354217	0.084	0.275821	0.212
	1456	Lib7	Tem_liver	GLYCOSYLPHOSPHATIDYLINOSITOL_GPI_ANCHOR_BIOSYNTHESIS	0.328168	0.087	0.267425	0.211
	1457	Lib7	Tem_liver	VITAMIN_B5_PANTOTHENATE_METABOLISM	0.450706	0.088	0.0819791	0.848
	1458	Lib7	Tem_liver	GOLGI_ASSOCIATED_VESICLE_BIOGENESIS	0.584535	0.093	0.497768	0.176
	1459	Lib7	Tem_liver	NUCLEARRS_PATHWAY	0.418059	0.096	0.291746	0.33
	1460	Lib7	Tem_liver	METABOLISM_OF_PORPHYRINS	0.388713	0.106	0.052493	0.911
	1461	Lib7	Tem_liver	KERATAN_SULFATE_DEGRADATION	0.541719	0.113	0.380754	0.342
	1462	Lib7	Tem_liver	KERATAN_SULFATE_KERATIN_METABOLISM	0.327271	0.119	0.149017	0.636
	1463	Lib7	Tem_liver	UNFOLDED_PROTEIN_RESPONSE	0.473423	0.124	0.252307	0.484
	1464	Lib7	Tem_liver	SYNTHESIS_OF_BILE_ACIDS_AND_BILE_SALTS	0.335278	0.124	0.154234	0.648
	1465	Lib7	Tem_liver	BRANCHED_CHAIN_AMINO_ACID_CATABOLISM	0.341513	0.128	0.140653	0.688
	1466	Lib7	Tem_liver	LIPOGENESIS	0.27059	0.136	0.144081	0.635
	1467	Lib7	Tem_liver	PENTOSE_AND_GLUCURONATE_INTERCONVERSIONS	0.345583	0.145	0.220772	0.458
	1468	Lib7	Tem_liver	RIBOFLAVIN_METABOLISM	0.397824	0.153	0.336042	0.226
	1469	Lib7	Tem_liver	TRANSPORT_OF_VITAMINS_NUCLEOSIDES_AND_RELATED_MOLECULES	0.273273	0.169	0.284264	0.155
	1470	Lib7	Tem_liver	SYNTHESIS_OF_BILE_ACIDS_AND_BILE_SALTS_VIA_7ALPHA_HYDROXYCHOLESTEROL	0.336638	0.188	0.178268	0.602
	1471	Lib7	Tem_liver	GLYCINE_SERINE_AND_THREONINE_METABOLISM	0.262996	0.188	0.124782	0.693
	1472	Lib7	Tem_liver	OXYGEN_DEPENDENT_PROLINE_HYDROXYLATION_OF_HYPOXIA_INDUCIBLE_FACTOR_ALPHA	0.432969	0.192	0.651637	0.022
	1473	Lib7	Tem_liver	LYSINE_DEGRADATION	0.279453	0.193	0.321027	0.113
	1474	Lib7	Tem_liver	SYNTHESIS_OF_PIPS_AT_THE_EARLY_ENDOSOME_MEMBRANE	0.391288	0.197	0.26304	0.427
	1475	Lib7	Tem_liver	REGULATION_OF_PYRUVATE_DEHYDROGENASE_PDH_COMPLEX	0.378935	0.198	0.312591	0.314
	1476	Lib7	Tem_liver	SULFUR_AMINO_ACID_METABOLISM	0.278066	0.214	0.155573	0.627
	1477	Lib7	Tem_liver	NICOTINATE_AND_NICOTINAMIDE_METABOLISM	0.281707	0.217	0.433944	0.015
	1478	Lib7	Tem_liver	GLUTAMINOLYSIS	0.342798	0.219	0.221557	0.491
	1479	Lib7	Tem_liver	PRIMARY_BILE_ACID_BIOSYNTHESIS	0.306208	0.224	0.196038	0.554
	1480	Lib7	Tem_liver	BILE_ACID_AND_BILE_SALT_METABOLISM	0.276743	0.228	0.18639	0.514
	1481	Lib7	Tem_liver	PTM_GAMMA_CARBOXYLATION_HYPUSINE_FORMATION_AND_ARYLSULFATASE_ACTIVATION	0.355868	0.231	0.449932	0.086
	1482	Lib7	Tem_liver	GLYCEROPHOSPHOLIPID_BIOSYNTHESIS	0.202591	0.233	0.186514	0.313
	1483	Lib7	Tem_liver	GLUCURONIDATION	0.350123	0.234	0.283678	0.376
	1484	Lib7	Tem_liver	SPHINGOLIPID_DE_NOVO_BIOSYNTHESIS	0.280439	0.234	0.140379	0.688
	1485	Lib7	Tem_liver	GLUCONEOGENESIS	0.238671	0.235	0.286444	0.11
	1486	Lib7	Tem_liver	ANDROGEN_BIOSYNTHESIS	0.416199	0.248	0.484851	0.14
	1487	Lib7	Tem_liver	INOSITOL_PHOSPHATE_METABOLISM	0.212918	0.248	0.161888	0.503
	1488	Lib7	Tem_liver	ETHANOL_OXIDATION	0.360004	0.25	0.519182	0.064
	1489	Lib7	Tem_liver	ENDOCYTOSIS	0.479054	0.266	0.830824	0.002
	1490	Lib7	Tem_liver	TERMINATION_OF_O_GLYCAN_BIOSYNTHESIS	0.358274	0.27	0.283254	0.41
	1491	Lib7	Tem_liver	GLYCOLYSIS	0.239986	0.276	0.345726	0.052
	1492	Lib7	Tem_liver	METABOLISM_OF_POLYAMINES	0.307318	0.278	0.242942	0.421
	1493	Lib7	Tem_liver	GLYCEROPHOSPHOLIPID_METABOLISM	0.200608	0.295	0.156012	0.515
	1494	Lib7	Tem_liver	HIF_PATHWAY	0.361529	0.296	0.536048	0.081
	1495	Lib7	Tem_liver	PYRUVATE_to_ACETYL_coA	0.370843	0.326	0.312977	0.452
	1496	Lib7	Tem_liver	ABC_TRANSPORTERS	0.204541	0.326	0.25398	0.168
	1497	Lib7	Tem_liver	KETOLYSIS	0.361687	0.342	0.827033	0.001
	1498	Lib7	Tem_liver	GH_PATHWAY	0.324555	0.344	0.239679	0.496
	1499	Lib7	Tem_liver	FRUCTOSE_AND_MANNOSE_METABOLISM	0.210816	0.351	0.225323	0.315
	1500	Lib7	Tem_liver	GLUCOSE_METABOLISM	0.196042	0.362	0.22804	0.231
	1501	Lib7	Tem_liver	SYNTHESIS_OF_BILE_ACIDS_AND_BILE_SALTS_VIA_24_HYDROXYCHOLESTEROL	0.289925	0.372	0.281493	0.373
	1502	Lib7	Tem_liver	REGULATION_OF_INSULIN_SECRETION_BY_ACETYLCHOLINE	0.337092	0.376	0.631364	0.027
	1503	Lib7	Tem_liver	PURINE_SALVAGE	0.257636	0.382	0.319948	0.225
	1504	Lib7	Tem_liver	TRIGLYCERIDE_BIOSYNTHESIS	0.196386	0.389	0.177585	0.497
	1505	Lib7	Tem_liver	PHENYLALANINE_METABOLISM	0.236888	0.392	0.129067	0.735
	1506	Lib7	Tem_liver	REGULATION_OF_HYPOXIA_INDUCIBLE_FACTOR_HIF_BY_OXYGEN	0.286247	0.397	0.546274	0.031
	1507	Lib7	Tem_liver	BIOSYNTHESIS_OF_UNSATURATED_FATTY_ACIDS	0.237016	0.397	0.192904	0.546
	1508	Lib7	Tem_liver	GLYCOGEN_BREAKDOWN_GLYCOGENOLYSIS	0.290571	0.399	0.45108	0.148
	1509	Lib7	Tem_liver	SULFUR_METABOLISM	0.271263	0.406	0.307265	0.328
	1510	Lib7	Tem_liver	PYRUVATE_METABOLISM	0.180581	0.42	0.165665	0.568
	1511	Lib7	Tem_liver	IONOTROPIC_ACTIVITY_OF_KAINATE_RECEPTORS	0.310014	0.432	0.466931	0.172
	1512	Lib7	Tem_liver	PEROXISOME	0.199902	0.44	0.250338	0.218
	1513	Lib7	Tem_liver	SYNTHESIS_OF_PE	0.259839	0.445	0.214507	0.545
	1514	Lib7	Tem_liver	KETOGENESIS	0.290344	0.455	0.683695	0.018
	1515	Lib7	Tem_liver	AMINO_ACID_SYNTHESIS_AND_INTERCONVERSION_TRANSAMINATION	0.212762	0.472	0.226671	0.404
	1516	Lib7	Tem_liver	ACTIVATION_OF_KAINATE_RECEPTORS_UPON_GLUTAMATE_BINDING	0.227398	0.473	0.447079	0.102
	1517	Lib7	Tem_liver	TRYPTOPHAN_METABOLISM	0.178811	0.473	0.097775	0.816
	1518	Lib7	Tem_liver	HYALURONAN_METABOLISM	0.232427	0.48	0.230202	0.487
	1519	Lib7	Tem_liver	GLUTATHIONE_METABOLISM	0.171412	0.481	0.113806	0.762
	1520	Lib7	Tem_liver	PEROXISOMAL_LIPID_METABOLISM	0.199536	0.482	0.135973	0.703
	1521	Lib7	Tem_liver	SYNTHESIS_OF_PA	0.186567	0.486	0.36492	0.061
	1522	Lib7	Tem_liver	REGULATION_OF_GLUCOKINASE_BY_GLUCOKINASE_REGULATORY_PROTEIN	0.340016	0.488	0.948259	0.001
	1523	Lib7	Tem_liver	CHREBP2_PATHWAY	0.271138	0.509	0.593461	0.044
	1524	Lib7	Tem_liver	LYSOSOME	0.158988	0.509	0.181063	0.398
	1525	Lib7	Tem_liver	CHYLOMICRON_MEDIATED_LIPID_TRANSPORT	0.213461	0.522	0.366916	0.183
	1526	Lib7	Tem_liver	SYNTHESIS_OF_VERY_LONG_CHAIN_FATTY_ACYL_COAS	0.195073	0.523	0.103862	0.793
	1527	Lib7	Tem_liver	PYRIMIDINE_CATABOLISM	0.201896	0.54	0.471456	0.072
	1528	Lib7	Tem_liver	ACYL_CHAIN_REMODELLING_OF_PC_PE_PG_PS	0.16691	0.559	0.147888	0.622
	1529	Lib7	Tem_liver	SPHINGOLIPID_METABOLISM	0.151023	0.562	0.127723	0.714
	1530	Lib7	Tem_liver	TRYPTOPHAN_CATABOLISM	0.197906	0.57	0.208043	0.563
	1531	Lib7	Tem_liver	METAL_ION_SLC_TRANSPORTERS	0.175633	0.571	0.334477	0.11
	1532	Lib7	Tem_liver	NITRIC_OXIDE_STIMULATES_GUANYLATE_CYCLASE	0.167427	0.591	0.394515	0.033
	1533	Lib7	Tem_liver	TAURINE_AND_HYPOTAURINE_METABOLISM	0.183843	0.596	0.289862	0.34
	1534	Lib7	Tem_liver	DIGESTION_OF_DIETARY_CARBOHYDRATE	0.247262	0.598	0.260206	0.513
	1535	Lib7	Tem_liver	ALDOSTERONE_REGULATED_SODIUM_REABSORPTION	0.155313	0.599	0.292445	0.187
	1536	Lib7	Tem_liver	PHOSPHOLIPID_METABOLISM	0.132223	0.609	0.136565	0.576
	1537	Lib7	Tem_liver	PAR1_PATHWAY	0.198919	0.617	0.476776	0.129
	1538	Lib7	Tem_liver	OTHER_GLYCAN_DEGRADATION	0.171219	0.618	0.205421	0.525
	1539	Lib7	Tem_liver	PURINE_METABOLISM	0.13667	0.625	0.189533	0.224
	1540	Lib7	Tem_liver	O_GLYCAN_BIOSYNTHESIS	0.151655	0.628	0.287611	0.16
	1541	Lib7	Tem_liver	INTEGRATION_OF_ENERGY_METABOLISM	0.138693	0.633	0.188201	0.411
	1542	Lib7	Tem_liver	VALINE_LEUCINE_AND_ISOLEUCINE_DEGRADATION	0.145203	0.634	0.289394	0.085
	1543	Lib7	Tem_liver	STEROID_HORMONE_BIOSYNTHESIS	0.137653	0.638	0.284292	0.116
	1544	Lib7	Tem_liver	PASSIVE_TRANSPORT_BY_AQUAPORINS	0.169548	0.65	0.478258	0.066
	1545	Lib7	Tem_liver	STEROID_BIOSYNTHESIS	0.144047	0.664	0.221721	0.45
	1546	Lib7	Tem_liver	ION_CHANNEL_TRANSPORT	0.128279	0.675	0.163596	0.494
	1547	Lib7	Tem_liver	HEPARAN_SULFATE_HEPARIN_HS_GAG_METABOLISM	0.13018	0.693	0.258821	0.173
	1548	Lib7	Tem_liver	BUTANOATE_METABOLISM	0.132515	0.695	0.430444	0.001
	1549	Lib7	Tem_liver	LIMONENE_AND_PINENE_DEGRADATION	0.166547	0.696	0.41536	0.166
	1550	Lib7	Tem_liver	PURINE_CATABOLISM	0.153109	0.696	0.436897	0.107
	1551	Lib7	Tem_liver	GLYCOLYSIS_GLUCONEOGENESIS	0.12999	0.701	0.230194	0.2
	1552	Lib7	Tem_liver	NITROGEN_METABOLISM	0.130443	0.711	0.0971295	0.804
	1553	Lib7	Tem_liver	LIPOPROTEIN_METABOLISM	0.131978	0.712	0.32936	0.197
	1554	Lib7	Tem_liver	O_LINKED_GLYCOSYLATION_OF_MUCINS	0.125107	0.713	0.271866	0.146
	1555	Lib7	Tem_liver	CHONDROITIN_SULFATE_DERMATAN_SULFATE_METABOLISM	0.124745	0.715	0.157016	0.579
	1556	Lib7	Tem_liver	DRUG_METABOLISM_OTHER_ENZYMES	0.123912	0.717	0.287558	0.152
	1557	Lib7	Tem_liver	METABOLISM_OF_CARBOHYDRATES	0.11697	0.728	0.131417	0.624
	1558	Lib7	Tem_liver	ASCORBATE_AND_ALDARATE_METABOLISM	0.139697	0.735	0.508065	0.02
	1559	Lib7	Tem_liver	SYNTHESIS_OF_PIPS_AT_THE_PLASMA_MEMBRANE	0.12598	0.735	0.227857	0.308
	1560	Lib7	Tem_liver	GLYCOSPHINGOLIPID_METABOLISM	0.123852	0.737	0.245565	0.242
	1561	Lib7	Tem_liver	GLUCOSE_TRANSPORT	0.129816	0.739	0.481408	0.034
	1562	Lib7	Tem_liver	PPAR_SIGNALING_PATHWAY	0.115573	0.74	0.12705	0.688
	1563	Lib7	Tem_liver	TYROSINE_METABOLISM	0.118502	0.744	0.265573	0.171
	1564	Lib7	Tem_liver	PROLINE_SYNTHESIS	0.169542	0.747	0.148971	0.759
	1565	Lib7	Tem_liver	PROLINE_DEGRADATION	0.147976	0.752	0.186332	0.691
	1566	Lib7	Tem_liver	REGULATION_OF_WATER_BALANCE_BY_RENAL_AQUAPORINS	0.1193	0.765	0.38159	0.082
	1567	Lib7	Tem_liver	BETA_ALANINE_METABOLISM	0.120185	0.766	0.345932	0.081
	1568	Lib7	Tem_liver	PROPANOATE_METABOLISM	0.116567	0.766	0.326331	0.064
	1569	Lib7	Tem_liver	BETA_OXIDATION	0.107994	0.768	0.26931	0.166
	1570	Lib7	Tem_liver	VOLTAGE_GATED_POTASSIUM_CHANNELS	0.106742	0.778	0.197956	0.377
	1571	Lib7	Tem_liver	SYNTHESIS_OF_PC	0.109812	0.782	0.357183	0.093
	1572	Lib7	Tem_liver	GALACTOSE_METABOLISM	0.103477	0.786	0.126417	0.697
	1573	Lib7	Tem_liver	AQUAPORIN_MEDIATED_TRANSPORT	0.100432	0.789	0.317298	0.149
	1574	Lib7	Tem_liver	FATTY_ACID_ACTIVATION_UPTAKE	0.102129	0.8	0.161011	0.651
	1575	Lib7	Tem_liver	CHOLINE	0.106344	0.813	0.368453	0.098
	1576	Lib7	Tem_liver	LINOLEIC_ACID_METABOLISM	0.0986376	0.822	0.331317	0.115
	1577	Lib7	Tem_liver	METABOLISM_OF_STEROID_HORMONES_AND_VITAMINS_A_AND_D	0.0978289	0.831	0.312771	0.149
	1578	Lib7	Tem_liver	HISTIDINE_METABOLISM	0.0862769	0.845	0.246045	0.338
	1579	Lib7	Tem_liver	STARCH_AND_SUCROSE_METABOLISM	0.0817447	0.849	0.279815	0.106
	1580	Lib7	Tem_liver	GLYCOSAMINOGLYCAN_METABOLISM	0.0922766	0.852	0.12457	0.705
	1581	Lib7	Tem_liver	ETHER_LIPID_METABOLISM	0.0820358	0.856	0.254231	0.264
	1582	Lib7	Tem_liver	ALPHA_LINOLENIC_ACID_METABOLISM	0.0785584	0.858	0.242697	0.297
	1583	Lib7	Tem_liver	AMINE_COMPOUND_SLC_TRANSPORTERS	0.0821356	0.861	0.214376	0.375
	1584	Lib7	Tem_liver	FATTY_ACID_METABOLISM	0.0775837	0.868	0.30576	0.079
	1585	Lib7	Tem_liver	TANDEM_PORE_DOMAIN_POTASSIUM_CHANNELS	0.0691719	0.875	0.320048	0.292
	1586	Lib7	Tem_liver	LIPID_DIGESTION_MOBILIZATION_AND_TRANSPORT	0.0639429	0.878	0.344074	0.059
	1587	Lib7	Tem_liver	RETINOL_METABOLISM	0.0724329	0.884	0.300829	0.078
	1588	Lib7	Tem_liver	ARACHIDONIC_ACID_METABOLISM	0.0744108	0.895	0.231898	0.209
	1589	Lib7	Tem_liver	METABOLISM_OF_LIPIDS_AND_LIPOPROTEINS	0.0956308	0.906	0.118951	0.713
	1590	Lib7	Tem_liver	METABOLISM_OF_XENOBIOTICS_BY_CYTOCHROME_P450	0.0509828	0.919	0.231756	0.252
	1591	Lib7	Tem_liver	TRANSPORT_OF_GLUCOSE_AND_OTHER_SUGARS_BILE_SALTS_AND_ORGANIC_ACIDS_METAL_IONS_AND_AMINE_COMPOUNDS	0.0781455	0.922	0.258229	0.049
	1592	Lib7	Tem_liver	FATTY_ACID_TRIACYLGLYCEROL_AND_KETONE_BODY_METABOLISM	0.0803931	0.927	0.211693	0.184
	1593	Lib7	Tem_liver	MITOCHONDRIAL_FATTY_ACID_BETA_OXIDATION	0.0359521	0.938	0.452271	0.037
	1594	Lib7	Tem_liver	GLYCEROLIPID_METABOLISM	0.0456642	0.94	0.314689	0.058
	1595	Lib7	Tem_liver	DRUG_METABOLISM_CYTOCHROME_P450	0.0493623	0.951	0.317097	0.041
	1596	Lib7	Tem_liver	ARGININE_AND_PROLINE_METABOLISM	0.0450883	0.952	0.257971	0.113
	1597	Lib7	Tem_liver	POTASSIUM_CHANNELS	0.0295307	0.989	0.220216	0.143
	1598	Lib7	Tem_liver	TRANSMEMBRANE_TRANSPORT_OF_SMALL_MOLECULES	0.0605041	0.994	0.20945	0.011
	1599	Lib7	Tem_liver	AMINO_ACID_AND_OLIGOPEPTIDE_SLC_TRANSPORTERS	0.0124621	0.994	0.158489	0.539
	1600	Lib7	Tem_liver	SLC_MEDIATED_TRANSMEMBRANE_TRANSPORT	0.0235146	1	0.254983	0.004
	1601	Lib7	Tem	OXPHO_COMPLEX_II	0.899137	0.001	0.012276	0.981
	1602	Lib7	Tem	AMINOACYL_TRNA_BIOSYNTHESIS	0.88675	0.001	0.031126	0.973
	1603	Lib7	Tem	TRNA_AMINOACYLATION	0.884756	0.001	0.0301918	0.974
	1604	Lib7	Tem	METABOLISM_OF_RNA	0.81067	0.001	0.0455396	0.944
	1605	Lib7	Tem	METABOLISM_OF_MRNA	0.81067	0.001	0.0455396	0.927
	1606	Lib7	Tem	SYNTHESIS_OF_DNA	0.81067	0.001	0.0455396	0.939
	1607	Lib7	Tem	PURINE_RIBONUCLEOSIDE_MONOPHOSPHATE_BIOSYNTHESIS	0.788893	0.001	0.109348	0.8
	1608	Lib7	Tem	TERPENOID_BACKBONE_BIOSYNTHESIS	0.747703	0.001	0.108781	0.784
	1609	Lib7	Tem	VALINE_LEUCINE_AND_ISOLEUCINE_BIOSYNTHESIS	0.746904	0.001	0.00266046	0.998
	1610	Lib7	Tem	REGULATION_OF_ORNITHINE_DECARBOXYLASE_ODC	0.745685	0.001	0.0392843	0.958
	1611	Lib7	Tem	RESPIRATORY_ELECTRON_TRANSPORT	0.723835	0.001	0.0450214	0.959
	1612	Lib7	Tem	OXPHO_COMPLEX_V	0.716922	0.001	0.142278	0.722
	1613	Lib7	Tem	OXPHO_COMPLEX_I	0.677099	0.001	0.0554179	0.938
	1614	Lib7	Tem	OXIDATIVE_PHOSPHORYLATION	0.652512	0.001	0.0264391	0.995
	1615	Lib7	Tem	TCA_CYCLE_AND_RESPIRATORY_ELECTRON_TRANSPORT	0.627229	0.001	0.0431254	0.981
	1616	Lib7	Tem	OXPHO_COMPLEX_IV	0.605556	0.001	0.10067	0.791
	1617	Lib7	Tem	N_GLYCAN_BIOSYNTHESIS	0.508113	0.001	0.0556702	0.926
	1618	Lib7	Tem	CHOLESTEROGENESIS	0.50069	0.001	0.148996	0.629
	1619	Lib7	Tem	IRON_UPTAKE_AND_TRANSPORT	0.493973	0.001	0.0652883	0.89
	1620	Lib7	Tem	ASPARAGINE_N_LINKED_GLYCOSYLATION	0.489281	0.001	0.0960687	0.823
	1621	Lib7	Tem	METABOLISM_OF_PROTEINS	0.342237	0.001	0.0945225	0.869
	1622	Lib7	Tem	METABOLISM_OF_AMINO_ACIDS_AND_DERIVATIVES	0.298946	0.001	0.0459648	0.981
	1623	Lib7	Tem	PENTOSE_PHOSPHATE	0.729805	0.001	0.0675227	0.888
	1624	Lib7	Tem	TCA_CYCLE	0.472414	0.001	0.13244	0.664
	1625	Lib7	Tem	PYRUVATE_METABOLISM_AND_CITRIC_ACID_TCA_CYCLE	0.461675	0.001	0.148078	0.636
	1626	Lib7	Tem	METABOLISM_OF_VITAMINS_AND_COFACTORS	0.407292	0.001	0.0593106	0.93
	1627	Lib7	Tem	LYSOSOME_VESICLE_BIOGENESIS	0.919943	0.002	0.467265	0.324
	1628	Lib7	Tem	REGULATION_OF_AUTOPHAGY	0.844324	0.003	0.305134	0.496
	1629	Lib7	Tem	PORPHYRIN_AND_CHLOROPHYLL_METABOLISM	0.4224	0.003	0.0564968	0.917
	1630	Lib7	Tem	CYSTEINE_AND_METHIONINE_METABOLISM	0.464493	0.005	0.0829191	0.843
	1631	Lib7	Tem	METABOLISM_OF_NUCLEOTIDES	0.339922	0.005	0.0470498	0.962
	1632	Lib7	Tem	SYNTHESIS_OF_SUBSTRATES_IN_N_GLYCAN_BIOSYTHESIS	0.572137	0.006	0.29658	0.244
	1633	Lib7	Tem	AMINO_SUGAR_AND_NUCLEOTIDE_SUGAR_METABOLISM	0.384264	0.008	0.17905	0.455
	1634	Lib7	Tem	SGOCP_ALL	0.330287	0.008	0.0580737	0.932
	1635	Lib7	Tem	FOLATE_BIOSYNTHESIS	0.637836	0.009	0.210032	0.563
	1636	Lib7	Tem	ADVANCED_GLYCOSYLATION_ENDPRODUCT_RECEPTOR_SIGNALING	0.929045	0.011	0.532076	0.365
	1637	Lib7	Tem	ONE_CARBON_POOL_BY_FOLATE	0.499403	0.012	0.170582	0.586
	1638	Lib7	Tem	SYNTHESIS_AND_INTERCONVERSION_OF_NUCLEOTIDE_DI_AND_TRIPHOSPHATES	0.472843	0.021	0.113454	0.757
	1639	Lib7	Tem	SYNTHESIS_OF_PIPS_AT_THE_GOLGI_MEMBRANE	0.469623	0.028	0.17409	0.589
	1640	Lib7	Tem	POST_TRANSLATIONAL_MODIFICATION_SYNTHESIS_OF_GPI_ANCHORED_PROTEINS	0.409905	0.03	0.181665	0.553
	1641	Lib7	Tem	GLYCOSYLPHOSPHATIDYLINOSITOL_GPI_ANCHOR_BIOSYNTHESIS	0.397814	0.031	0.183973	0.506
	1642	Lib7	Tem	SULFUR_AMINO_ACID_METABOLISM	0.393781	0.034	0.109257	0.797
	1643	Lib7	Tem	INOSITOL_PHOSPHATE_METABOLISM	0.290298	0.042	0.182534	0.385
	1644	Lib7	Tem	VITAMIN_B5_PANTOTHENATE_METABOLISM	0.518368	0.043	0.0392418	0.948
	1645	Lib7	Tem	SYNTHESIS_OF_PIPS_AT_THE_LATE_ENDOSOME_MEMBRANE	0.614235	0.045	0.228194	0.593
	1646	Lib7	Tem	GLYOXYLATE_AND_DICARBOXYLATE_METABOLISM	0.433011	0.048	0.267971	0.333
	1647	Lib7	Tem	CERAMIDE_PATHWAY	0.609225	0.05	0.300673	0.447
	1648	Lib7	Tem	LACTATE_GENERATION	0.769337	0.052	0.0401327	0.942
	1649	Lib7	Tem	SELENOAMINO_ACID_METABOLISM	0.396362	0.053	0.227764	0.379
	1650	Lib7	Tem	GOLGI_ASSOCIATED_VESICLE_BIOGENESIS	0.639829	0.057	0.424989	0.272
	1651	Lib7	Tem	LIPOGENESIS	0.313701	0.057	0.101126	0.82
	1652	Lib7	Tem	SYNTHESIS_OF_PIPS_AT_THE_EARLY_ENDOSOME_MEMBRANE	0.507672	0.061	0.253684	0.454
	1653	Lib7	Tem	METABOLISM_OF_PORPHYRINS	0.418099	0.063	0.0480414	0.921
	1654	Lib7	Tem	KERATAN_SULFATE_BIOSYNTHESIS	0.376457	0.079	0.261989	0.298
	1655	Lib7	Tem	BILE_SALT_AND_ORGANIC_ANION_SLC_TRANSPORTERS	0.466485	0.087	0.288018	0.357
	1656	Lib7	Tem	ACTIVATION_OF_GENES_BY_ATF4	0.784151	0.096	0.597112	0.315
	1657	Lib7	Tem	PYRIMIDINE_METABOLISM	0.262037	0.108	0.137147	0.648
	1658	Lib7	Tem	OXPHO_COMPLEX_III	0.627409	0.109	0.0278699	0.949
	1659	Lib7	Tem	POLYAMINE_SYNTHESIS	0.563639	0.12	0.36469	0.332
	1660	Lib7	Tem	PHENYLALANINE_METABOLISM	0.357372	0.124	0.12335	0.726
	1661	Lib7	Tem	PGC1A_PATHWAY	0.662788	0.137	0.739045	0.071
	1662	Lib7	Tem	ABACAVIR_TRANSPORT_AND_METABOLISM	0.404186	0.146	0.177359	0.612
	1663	Lib7	Tem	LYSINE_DEGRADATION	0.308902	0.146	0.218646	0.406
	1664	Lib7	Tem	PANTOTHENATE_AND_COA_BIOSYNTHESIS	0.338125	0.152	0.224691	0.435
	1665	Lib7	Tem	KERATAN_SULFATE_KERATIN_METABOLISM	0.305632	0.158	0.233689	0.36
	1666	Lib7	Tem	ALANINE_ASPARTATE_AND_GLUTAMATE_METABOLISM	0.275713	0.161	0.257066	0.221
	1667	Lib7	Tem	UNFOLDED_PROTEIN_RESPONSE	0.455131	0.166	0.419279	0.18
	1668	Lib7	Tem	GLYCOGEN_BREAKDOWN_GLYCOGENOLYSIS	0.411146	0.174	0.436966	0.143
	1669	Lib7	Tem	RIBOFLAVIN_METABOLISM	0.369773	0.176	0.31719	0.275
	1670	Lib7	Tem	ANDROGEN_BIOSYNTHESIS	0.457106	0.178	0.459859	0.189
	1671	Lib7	Tem	ENDOCYTOSIS	0.558186	0.181	0.552358	0.16
	1672	Lib7	Tem	METABOLISM_OF_CARBOHYDRATES	0.183922	0.191	0.120387	0.736
	1673	Lib7	Tem	KETOLYSIS	0.453371	0.203	0.687669	0.031
	1674	Lib7	Tem	NICOTINATE_AND_NICOTINAMIDE_METABOLISM	0.277559	0.217	0.429684	0.014
	1675	Lib7	Tem	TERMINATION_OF_O_GLYCAN_BIOSYNTHESIS	0.383818	0.23	0.342347	0.288
	1676	Lib7	Tem	GLUCOSE_METABOLISM	0.225534	0.24	0.257911	0.132
	1677	Lib7	Tem	IONOTROPIC_ACTIVITY_OF_KAINATE_RECEPTORS	0.414437	0.251	0.591975	0.057
	1678	Lib7	Tem	KERATAN_SULFATE_DEGRADATION	0.425511	0.253	0.545438	0.139
	1679	Lib7	Tem	GLUCURONIDATION	0.350446	0.254	0.243045	0.477
	1680	Lib7	Tem	GH_PATHWAY	0.359353	0.26	0.352678	0.27
	1681	Lib7	Tem	GLYCOLYSIS	0.246846	0.262	0.349902	0.044
	1682	Lib7	Tem	CHYLOMICRON_MEDIATED_LIPID_TRANSPORT	0.318393	0.273	0.255846	0.412
	1683	Lib7	Tem	REGULATION_OF_PYRUVATE_DEHYDROGENASE_PDH_COMPLEX	0.316932	0.288	0.350731	0.221
	1684	Lib7	Tem	HIF_PATHWAY	0.359306	0.289	0.592943	0.033
	1685	Lib7	Tem	SPHINGOLIPID_DE_NOVO_BIOSYNTHESIS	0.253408	0.296	0.175531	0.558
	1686	Lib7	Tem	GLUCONEOGENESIS	0.220914	0.3	0.256705	0.175
	1687	Lib7	Tem	TRIGLYCERIDE_BIOSYNTHESIS	0.218603	0.308	0.171287	0.514
	1688	Lib7	Tem	KETOGENESIS	0.349631	0.316	0.596933	0.064
	1689	Lib7	Tem	METABOLISM_OF_POLYAMINES	0.269016	0.33	0.27411	0.372
	1690	Lib7	Tem	TRYPTOPHAN_METABOLISM	0.213927	0.336	0.118239	0.743
	1691	Lib7	Tem	HYALURONAN_METABOLISM	0.287779	0.347	0.272166	0.381
	1692	Lib7	Tem	PENTOSE_AND_GLUCURONATE_INTERCONVERSIONS	0.26019	0.352	0.13549	0.71
	1693	Lib7	Tem	LIMONENE_AND_PINENE_DEGRADATION	0.28735	0.36	0.381057	0.191
	1694	Lib7	Tem	CHONDROITIN_SULFATE_DERMATAN_SULFATE_METABOLISM	0.214642	0.363	0.120556	0.738
	1695	Lib7	Tem	BRANCHED_CHAIN_AMINO_ACID_CATABOLISM	0.25021	0.372	0.202188	0.502
	1696	Lib7	Tem	TRANSPORT_OF_VITAMINS_NUCLEOSIDES_AND_RELATED_MOLECULES	0.209447	0.379	0.237104	0.287
	1697	Lib7	Tem	GLUTAMINOLYSIS	0.251987	0.381	0.282194	0.353
	1698	Lib7	Tem	ACTIVATION_OF_KAINATE_RECEPTORS_UPON_GLUTAMATE_BINDING	0.274526	0.385	0.55439	0.023
	1699	Lib7	Tem	REGULATION_OF_INSULIN_SECRETION_BY_ACETYLCHOLINE	0.308628	0.391	0.74081	0.003
	1700	Lib7	Tem	TYROSINE_METABOLISM	0.211309	0.399	0.163161	0.549
	1701	Lib7	Tem	BIOSYNTHESIS_OF_UNSATURATED_FATTY_ACIDS	0.22762	0.412	0.201407	0.507
	1702	Lib7	Tem	SYNTHESIS_OF_BILE_ACIDS_AND_BILE_SALTS_VIA_24_HYDROXYCHOLESTEROL	0.26847	0.42	0.350718	0.232
	1703	Lib7	Tem	PTM_GAMMA_CARBOXYLATION_HYPUSINE_FORMATION_AND_ARYLSULFATASE_ACTIVATION	0.26058	0.421	0.40911	0.151
	1704	Lib7	Tem	LIPOPROTEIN_METABOLISM	0.226655	0.423	0.31603	0.229
	1705	Lib7	Tem	ETHANOL_OXIDATION	0.271444	0.426	0.526768	0.061
	1706	Lib7	Tem	STEROID_BIOSYNTHESIS	0.223958	0.435	0.272046	0.297
	1707	Lib7	Tem	SULFUR_METABOLISM	0.259543	0.436	0.373141	0.215
	1708	Lib7	Tem	DIGESTION_OF_DIETARY_CARBOHYDRATE	0.309658	0.444	0.254232	0.554
	1709	Lib7	Tem	OXYGEN_DEPENDENT_PROLINE_HYDROXYLATION_OF_HYPOXIA_INDUCIBLE_FACTOR_ALPHA	0.282731	0.449	0.655244	0.021
	1710	Lib7	Tem	FRUCTOSE_AND_MANNOSE_METABOLISM	0.192368	0.452	0.294717	0.12
	1711	Lib7	Tem	GLYCEROPHOSPHOLIPID_BIOSYNTHESIS	0.164401	0.465	0.154217	0.555
	1712	Lib7	Tem	REGULATION_OF_GLUCOKINASE_BY_GLUCOKINASE_REGULATORY_PROTEIN	0.350924	0.468	0.823549	0.022
	1713	Lib7	Tem	CHREBP2_PATHWAY	0.287863	0.469	0.551554	0.089
	1714	Lib7	Tem	NUCLEARRS_PATHWAY	0.226465	0.47	0.338736	0.207
	1715	Lib7	Tem	REGULATION_OF_HYPOXIA_INDUCIBLE_FACTOR_HIF_BY_OXYGEN	0.243607	0.472	0.456792	0.11
	1716	Lib7	Tem	PEROXISOME	0.187088	0.482	0.283453	0.157
	1717	Lib7	Tem	PYRUVATE_to_ACETYL_coA	0.284715	0.484	0.350149	0.358
	1718	Lib7	Tem	METAL_ION_SLC_TRANSPORTERS	0.189117	0.493	0.389669	0.043
	1719	Lib7	Tem	SYNTHESIS_OF_PA	0.190917	0.496	0.340963	0.076
	1720	Lib7	Tem	LYSOSOME	0.162159	0.502	0.215208	0.219
	1721	Lib7	Tem	O_GLYCAN_BIOSYNTHESIS	0.176808	0.508	0.264547	0.209
	1722	Lib7	Tem	TAURINE_AND_HYPOTAURINE_METABOLISM	0.224069	0.511	0.211546	0.524
	1723	Lib7	Tem	ACYL_CHAIN_REMODELLING_OF_PC_PE_PG_PS	0.187794	0.511	0.200274	0.435
	1724	Lib7	Tem	GLUTATHIONE_METABOLISM	0.162613	0.513	0.119733	0.748
	1725	Lib7	Tem	GLYCOSAMINOGLYCAN_METABOLISM	0.157898	0.513	0.134843	0.623
	1726	Lib7	Tem	SYNTHESIS_OF_PE	0.224733	0.528	0.216637	0.529
	1727	Lib7	Tem	PROPANOATE_METABOLISM	0.175087	0.535	0.341965	0.062
	1728	Lib7	Tem	GLYCINE_SERINE_AND_THREONINE_METABOLISM	0.176187	0.538	0.0985422	0.805
	1729	Lib7	Tem	PYRUVATE_METABOLISM	0.164964	0.539	0.120613	0.72
	1730	Lib7	Tem	VALINE_LEUCINE_AND_ISOLEUCINE_DEGRADATION	0.163723	0.54	0.312325	0.056
	1731	Lib7	Tem	FATTY_ACID_METABOLISM	0.166473	0.567	0.308823	0.074
	1732	Lib7	Tem	HEPARAN_SULFATE_HEPARIN_HS_GAG_METABOLISM	0.158238	0.568	0.225255	0.317
	1733	Lib7	Tem	GALACTOSE_METABOLISM	0.170841	0.583	0.183388	0.524
	1734	Lib7	Tem	BETA_OXIDATION	0.161652	0.583	0.271122	0.162
	1735	Lib7	Tem	PROLINE_DEGRADATION	0.260451	0.586	0.250272	0.583
	1736	Lib7	Tem	INTEGRATION_OF_ENERGY_METABOLISM	0.147366	0.588	0.210136	0.305
	1737	Lib7	Tem	PEROXISOMAL_LIPID_METABOLISM	0.164443	0.594	0.213973	0.438
	1738	Lib7	Tem	O_LINKED_GLYCOSYLATION_OF_MUCINS	0.15241	0.602	0.2758	0.115
	1739	Lib7	Tem	SYNTHESIS_OF_BILE_ACIDS_AND_BILE_SALTS_VIA_7ALPHA_HYDROXYCHOLESTEROL	0.172347	0.607	0.17196	0.628
	1740	Lib7	Tem	GLYCEROPHOSPHOLIPID_METABOLISM	0.142997	0.61	0.16177	0.476
	1741	Lib7	Tem	ETHER_LIPID_METABOLISM	0.152975	0.611	0.249511	0.27
	1742	Lib7	Tem	ION_CHANNEL_TRANSPORT	0.145824	0.614	0.158848	0.527
	1743	Lib7	Tem	PURINE_CATABOLISM	0.176632	0.621	0.581924	0.011
	1744	Lib7	Tem	ABC_TRANSPORTERS	0.150008	0.621	0.226157	0.254
	1745	Lib7	Tem	SYNTHESIS_OF_BILE_ACIDS_AND_BILE_SALTS	0.15446	0.626	0.169237	0.589
	1746	Lib7	Tem	PAR1_PATHWAY	0.197411	0.646	0.595702	0.041
	1747	Lib7	Tem	FATTY_ACID_TRIACYLGLYCEROL_AND_KETONE_BODY_METABOLISM	0.129459	0.665	0.232597	0.083
	1748	Lib7	Tem	PURINE_SALVAGE	0.151991	0.667	0.271964	0.334
	1749	Lib7	Tem	PRIMARY_BILE_ACID_BIOSYNTHESIS	0.146696	0.668	0.162216	0.652
	1750	Lib7	Tem	STEROID_HORMONE_BIOSYNTHESIS	0.136275	0.669	0.280022	0.148
	1751	Lib7	Tem	BUTANOATE_METABOLISM	0.138941	0.671	0.420496	0.007
	1752	Lib7	Tem	ASCORBATE_AND_ALDARATE_METABOLISM	0.146333	0.681	0.353104	0.173
	1753	Lib7	Tem	PYRIMIDINE_CATABOLISM	0.157445	0.683	0.596309	0.009
	1754	Lib7	Tem	CHOLINE	0.149017	0.687	0.300525	0.239
	1755	Lib7	Tem	DRUG_METABOLISM_OTHER_ENZYMES	0.131399	0.69	0.229233	0.294
	1756	Lib7	Tem	GLUCOSE_TRANSPORT	0.144935	0.691	0.453878	0.046
	1757	Lib7	Tem	PHOSPHOLIPID_METABOLISM	0.125308	0.695	0.165947	0.312
	1758	Lib7	Tem	REGULATION_OF_WATER_BALANCE_BY_RENAL_AQUAPORINS	0.139866	0.701	0.378383	0.103
	1759	Lib7	Tem	ALDOSTERONE_REGULATED_SODIUM_REABSORPTION	0.128534	0.701	0.39614	0.034
	1760	Lib7	Tem	BILE_ACID_AND_BILE_SALT_METABOLISM	0.122831	0.733	0.144087	0.649
	1761	Lib7	Tem	LINOLEIC_ACID_METABOLISM	0.117741	0.735	0.362888	0.079
	1762	Lib7	Tem	GLYCOLYSIS_GLUCONEOGENESIS	0.12175	0.738	0.254018	0.112
	1763	Lib7	Tem	HISTIDINE_METABOLISM	0.120225	0.742	0.215953	0.427
	1764	Lib7	Tem	FATTY_ACID_ACTIVATION_UPTAKE	0.12017	0.768	0.147099	0.677
	1765	Lib7	Tem	PURINE_METABOLISM	0.11395	0.773	0.211769	0.12
	1766	Lib7	Tem	METABOLISM_OF_STEROID_HORMONES_AND_VITAMINS_A_AND_D	0.105325	0.774	0.330897	0.094
	1767	Lib7	Tem	LIPID_DIGESTION_MOBILIZATION_AND_TRANSPORT	0.107817	0.778	0.282991	0.174
	1768	Lib7	Tem	PROLINE_SYNTHESIS	0.125747	0.781	0.25914	0.565
	1769	Lib7	Tem	METABOLISM_OF_LIPIDS_AND_LIPOPROTEINS	0.114267	0.797	0.153692	0.31
	1770	Lib7	Tem	SYNTHESIS_OF_PIPS_AT_THE_PLASMA_MEMBRANE	0.106991	0.797	0.357158	0.039
	1771	Lib7	Tem	SYNTHESIS_OF_PC	0.0976633	0.804	0.264063	0.291
	1772	Lib7	Tem	STARCH_AND_SUCROSE_METABOLISM	0.102056	0.805	0.281434	0.114
	1773	Lib7	Tem	NITRIC_OXIDE_STIMULATES_GUANYLATE_CYCLASE	0.0992407	0.807	0.473695	0.004
	1774	Lib7	Tem	ALPHA_LINOLENIC_ACID_METABOLISM	0.095544	0.808	0.244465	0.285
	1775	Lib7	Tem	BETA_ALANINE_METABOLISM	0.0948238	0.816	0.293126	0.212
	1776	Lib7	Tem	AQUAPORIN_MEDIATED_TRANSPORT	0.0978994	0.822	0.350512	0.089
	1777	Lib7	Tem	SYNTHESIS_OF_VERY_LONG_CHAIN_FATTY_ACYL_COAS	0.098331	0.826	0.167643	0.628
	1778	Lib7	Tem	SPHINGOLIPID_METABOLISM	0.099555	0.837	0.250932	0.123
	1779	Lib7	Tem	PPAR_SIGNALING_PATHWAY	0.0828585	0.863	0.125436	0.68
	1780	Lib7	Tem	GLYCOSPHINGOLIPID_METABOLISM	0.0730462	0.879	0.39051	0.018
	1781	Lib7	Tem	AMINE_COMPOUND_SLC_TRANSPORTERS	0.0615179	0.896	0.259477	0.221
	1782	Lib7	Tem	TANDEM_PORE_DOMAIN_POTASSIUM_CHANNELS	0.060858	0.898	0.463723	0.067
	1783	Lib7	Tem	OTHER_GLYCAN_DEGRADATION	0.0652898	0.905	0.174635	0.574
	1784	Lib7	Tem	PASSIVE_TRANSPORT_BY_AQUAPORINS	0.0578457	0.906	0.492848	0.047
	1785	Lib7	Tem	RETINOL_METABOLISM	0.0599246	0.908	0.295647	0.088
	1786	Lib7	Tem	AMINO_ACID_SYNTHESIS_AND_INTERCONVERSION_TRANSAMINATION	0.0608135	0.911	0.316163	0.225
	1787	Lib7	Tem	METABOLISM_OF_XENOBIOTICS_BY_CYTOCHROME_P450	0.0582504	0.911	0.221829	0.294
	1788	Lib7	Tem	DRUG_METABOLISM_CYTOCHROME_P450	0.0559883	0.921	0.290891	0.081
	1789	Lib7	Tem	ARACHIDONIC_ACID_METABOLISM	0.0643098	0.926	0.283424	0.074
	1790	Lib7	Tem	GLYCEROLIPID_METABOLISM	0.0543113	0.937	0.235458	0.24
	1791	Lib7	Tem	NITROGEN_METABOLISM	0.0357261	0.95	0.117478	0.743
	1792	Lib7	Tem	ARGININE_AND_PROLINE_METABOLISM	0.0453576	0.956	0.30009	0.05
	1793	Lib7	Tem	VOLTAGE_GATED_POTASSIUM_CHANNELS	0.0340008	0.961	0.261361	0.15
	1794	Lib7	Tem	TRYPTOPHAN_CATABOLISM	0.0245929	0.962	0.315252	0.322
	1795	Lib7	Tem	MITOCHONDRIAL_FATTY_ACID_BETA_OXIDATION	0.00765646	0.981	0.563865	0.004
	1796	Lib7	Tem	TRANSPORT_OF_GLUCOSE_AND_OTHER_SUGARS_BILE_SALTS_AND_ORGANIC_ACIDS_METAL_IONS_AND_AMINE_COMPOUNDS	0.0437382	0.982	0.31591	0.001
	1797	Lib7	Tem	POTASSIUM_CHANNELS	0.0258857	0.989	0.280519	0.018
	1798	Lib7	Tem	AMINO_ACID_AND_OLIGOPEPTIDE_SLC_TRANSPORTERS	0.0141462	0.991	0.145848	0.62
	1799	Lib7	Tem	TRANSMEMBRANE_TRANSPORT_OF_SMALL_MOLECULES	0.0499186	0.999	0.194378	0.034
	1800	Lib7	Tem	SLC_MEDIATED_TRANSMEMBRANE_TRANSPORT	0.0211143	1	0.242166	0.003
	1801	Lib7	Trm_gut	METABOLISM_OF_RNA	0.844895	0.001	0.041745	0.945
	1802	Lib7	Trm_gut	SYNTHESIS_OF_DNA	0.844895	0.001	0.041745	0.942
	1803	Lib7	Trm_gut	METABOLISM_OF_MRNA	0.844895	0.001	0.041745	0.957
	1804	Lib7	Trm_gut	AMINOACYL_TRNA_BIOSYNTHESIS	0.810058	0.001	0.0305898	0.975
	1805	Lib7	Trm_gut	TRNA_AMINOACYLATION	0.807596	0.001	0.0297122	0.977
	1806	Lib7	Trm_gut	TERPENOID_BACKBONE_BIOSYNTHESIS	0.784437	0.001	0.123755	0.74
	1807	Lib7	Trm_gut	REGULATION_OF_ORNITHINE_DECARBOXYLASE_ODC	0.762734	0.001	0.0671335	0.882
	1808	Lib7	Trm_gut	RESPIRATORY_ELECTRON_TRANSPORT	0.688908	0.001	0.0375773	0.977
	1809	Lib7	Trm_gut	OXPHO_COMPLEX_I	0.656801	0.001	0.080213	0.864
	1810	Lib7	Trm_gut	CHOLESTEROGENESIS	0.643692	0.001	0.0744293	0.886
	1811	Lib7	Trm_gut	TCA_CYCLE_AND_RESPIRATORY_ELECTRON_TRANSPORT	0.605449	0.001	0.0264039	0.996
	1812	Lib7	Trm_gut	OXIDATIVE_PHOSPHORYLATION	0.566221	0.001	0.0261398	0.993
	1813	Lib7	Trm_gut	ASPARAGINE_N_LINKED_GLYCOSYLATION	0.445408	0.001	0.0437128	0.975
	1814	Lib7	Trm_gut	METABOLISM_OF_PROTEINS	0.326943	0.001	0.0398355	0.991
	1815	Lib7	Trm_gut	METABOLISM_OF_AMINO_ACIDS_AND_DERIVATIVES	0.283625	0.001	0.0720085	0.949
	1816	Lib7	Trm_gut	PURINE_RIBONUCLEOSIDE_MONOPHOSPHATE_BIOSYNTHESIS	0.690675	0.001	0.135985	0.72
	1817	Lib7	Trm_gut	VALINE_LEUCINE_AND_ISOLEUCINE_BIOSYNTHESIS	0.668016	0.001	0.0103093	0.983
	1818	Lib7	Trm_gut	OXPHO_COMPLEX_V	0.665742	0.001	0.134315	0.732
	1819	Lib7	Trm_gut	SYNTHESIS_OF_SUBSTRATES_IN_N_GLYCAN_BIOSYTHESIS	0.612765	0.001	0.183072	0.588
	1820	Lib7	Trm_gut	OXPHO_COMPLEX_IV	0.588359	0.001	0.180662	0.566
	1821	Lib7	Trm_gut	PYRUVATE_METABOLISM_AND_CITRIC_ACID_TCA_CYCLE	0.460818	0.001	0.138812	0.659
	1822	Lib7	Trm_gut	KERATAN_SULFATE_BIOSYNTHESIS	0.544113	0.002	0.101862	0.784
	1823	Lib7	Trm_gut	METABOLISM_OF_VITAMINS_AND_COFACTORS	0.366189	0.002	0.0628354	0.924
	1824	Lib7	Trm_gut	AMINO_SUGAR_AND_NUCLEOTIDE_SUGAR_METABOLISM	0.373674	0.003	0.150264	0.595
	1825	Lib7	Trm_gut	KERATAN_SULFATE_KERATIN_METABOLISM	0.478462	0.004	0.095381	0.818
	1826	Lib7	Trm_gut	N_GLYCAN_BIOSYNTHESIS	0.418558	0.004	0.0761989	0.873
	1827	Lib7	Trm_gut	PORPHYRIN_AND_CHLOROPHYLL_METABOLISM	0.426507	0.006	0.0606712	0.917
	1828	Lib7	Trm_gut	OXPHO_COMPLEX_II	0.782864	0.008	0	1
	1829	Lib7	Trm_gut	ONE_CARBON_POOL_BY_FOLATE	0.558824	0.008	0.124665	0.723
	1830	Lib7	Trm_gut	TCA_CYCLE	0.434623	0.008	0.0638144	0.897
	1831	Lib7	Trm_gut	LIPOGENESIS	0.368725	0.008	0.1071	0.761
	1832	Lib7	Trm_gut	LACTATE_GENERATION	0.838143	0.011	0.0603648	0.904
	1833	Lib7	Trm_gut	SYNTHESIS_OF_PIPS_AT_THE_GOLGI_MEMBRANE	0.507431	0.013	0.119418	0.777
	1834	Lib7	Trm_gut	SYNTHESIS_AND_INTERCONVERSION_OF_NUCLEOTIDE_DI_AND_TRIPHOSPHATES	0.472349	0.017	0.103094	0.791
	1835	Lib7	Trm_gut	ADVANCED_GLYCOSYLATION_ENDPRODUCT_RECEPTOR_SIGNALING	0.91313	0.018	0.550912	0.363
	1836	Lib7	Trm_gut	REGULATION_OF_AUTOPHAGY	0.763286	0.018	0.379367	0.378
	1837	Lib7	Trm_gut	CHOLINE	0.469358	0.019	0.143135	0.681
	1838	Lib7	Trm_gut	SYNTHESIS_OF_PIPS_AT_THE_EARLY_ENDOSOME_MEMBRANE	0.550927	0.025	0.298093	0.349
	1839	Lib7	Trm_gut	SGOCP_ALL	0.300634	0.026	0.171141	0.455
	1840	Lib7	Trm_gut	IRON_UPTAKE_AND_TRANSPORT	0.36028	0.028	0.0563583	0.93
	1841	Lib7	Trm_gut	REGULATION_OF_WATER_BALANCE_BY_RENAL_AQUAPORINS	0.447979	0.029	0.105796	0.779
	1842	Lib7	Trm_gut	OXYGEN_DEPENDENT_PROLINE_HYDROXYLATION_OF_HYPOXIA_INDUCIBLE_FACTOR_ALPHA	0.633194	0.037	0.402533	0.249
	1843	Lib7	Trm_gut	FOLATE_BIOSYNTHESIS	0.530366	0.044	0.193899	0.631
	1844	Lib7	Trm_gut	METABOLISM_OF_NUCLEOTIDES	0.28475	0.044	0.142922	0.589
	1845	Lib7	Trm_gut	OXPHO_COMPLEX_III	0.704105	0.045	0.0295289	0.947
	1846	Lib7	Trm_gut	PGC1A_PATHWAY	0.770743	0.046	0.594548	0.22
	1847	Lib7	Trm_gut	PYRIMIDINE_METABOLISM	0.301884	0.046	0.161571	0.512
	1848	Lib7	Trm_gut	SELENOAMINO_ACID_METABOLISM	0.392297	0.047	0.142846	0.689
	1849	Lib7	Trm_gut	SULFUR_AMINO_ACID_METABOLISM	0.386146	0.048	0.154085	0.642
	1850	Lib7	Trm_gut	LYSOSOME_VESICLE_BIOGENESIS	0.768593	0.055	0.500913	0.288
	1851	Lib7	Trm_gut	INOSITOL_PHOSPHATE_METABOLISM	0.276999	0.066	0.101276	0.825
	1852	Lib7	Trm_gut	PENTOSE_PHOSPHATE	0.563825	0.07	0.0159415	0.977
	1853	Lib7	Trm_gut	GALACTOSE_METABOLISM	0.340611	0.075	0.0680068	0.904
	1854	Lib7	Trm_gut	CERAMIDE_PATHWAY	0.570099	0.077	0.241791	0.549
	1855	Lib7	Trm_gut	TERMINATION_OF_O_GLYCAN_BIOSYNTHESIS	0.51678	0.078	0.187376	0.629
	1856	Lib7	Trm_gut	GH_PATHWAY	0.508599	0.079	0.297218	0.381
	1857	Lib7	Trm_gut	POST_TRANSLATIONAL_MODIFICATION_SYNTHESIS_OF_GPI_ANCHORED_PROTEINS	0.353142	0.08	0.145733	0.659
	1858	Lib7	Trm_gut	GOLGI_ASSOCIATED_VESICLE_BIOGENESIS	0.59541	0.084	0.414186	0.246
	1859	Lib7	Trm_gut	UNFOLDED_PROTEIN_RESPONSE	0.515353	0.091	0.324589	0.358
	1860	Lib7	Trm_gut	AQUAPORIN_MEDIATED_TRANSPORT	0.33718	0.091	0.195371	0.465
	1861	Lib7	Trm_gut	SULFUR_METABOLISM	0.437248	0.095	0.239337	0.464
	1862	Lib7	Trm_gut	METABOLISM_OF_POLYAMINES	0.398762	0.105	0.233286	0.429
	1863	Lib7	Trm_gut	FRUCTOSE_AND_MANNOSE_METABOLISM	0.295916	0.115	0.168682	0.537
	1864	Lib7	Trm_gut	VITAMIN_B5_PANTOTHENATE_METABOLISM	0.405788	0.118	0.0256648	0.947
	1865	Lib7	Trm_gut	STEROID_BIOSYNTHESIS	0.361773	0.119	0.0173218	0.975
	1866	Lib7	Trm_gut	GLYCOSYLPHOSPHATIDYLINOSITOL_GPI_ANCHOR_BIOSYNTHESIS	0.324082	0.122	0.145259	0.66
	1867	Lib7	Trm_gut	CYSTEINE_AND_METHIONINE_METABOLISM	0.301715	0.123	0.0835011	0.864
	1868	Lib7	Trm_gut	METABOLISM_OF_PORPHYRINS	0.373723	0.124	0.0246338	0.959
	1869	Lib7	Trm_gut	ACYL_CHAIN_REMODELLING_OF_PC_PE_PG_PS	0.308462	0.126	0.308294	0.168
	1870	Lib7	Trm_gut	GLUTAMINOLYSIS	0.375206	0.135	0.189786	0.573
	1871	Lib7	Trm_gut	SYNTHESIS_OF_PIPS_AT_THE_LATE_ENDOSOME_MEMBRANE	0.486017	0.14	0.315843	0.385
	1872	Lib7	Trm_gut	BIOSYNTHESIS_OF_UNSATURATED_FATTY_ACIDS	0.336233	0.14	0.298423	0.217
	1873	Lib7	Trm_gut	REGULATION_OF_PYRUVATE_DEHYDROGENASE_PDH_COMPLEX	0.406357	0.146	0.267307	0.418
	1874	Lib7	Trm_gut	PAR1_PATHWAY	0.450373	0.176	0.324094	0.361
	1875	Lib7	Trm_gut	PROLINE_DEGRADATION	0.569011	0.177	0.326733	0.436
	1876	Lib7	Trm_gut	NICOTINATE_AND_NICOTINAMIDE_METABOLISM	0.293056	0.2	0.162726	0.615
	1877	Lib7	Trm_gut	ALANINE_ASPARTATE_AND_GLUTAMATE_METABOLISM	0.261601	0.204	0.254674	0.204
	1878	Lib7	Trm_gut	PURINE_METABOLISM	0.195461	0.207	0.0548187	0.972
	1879	Lib7	Trm_gut	O_LINKED_GLYCOSYLATION_OF_MUCINS	0.24772	0.208	0.144103	0.646
	1880	Lib7	Trm_gut	PENTOSE_AND_GLUCURONATE_INTERCONVERSIONS	0.310185	0.223	0.179487	0.567
	1881	Lib7	Trm_gut	ALDOSTERONE_REGULATED_SODIUM_REABSORPTION	0.27912	0.228	0.173785	0.548
	1882	Lib7	Trm_gut	GLYCOLYSIS	0.262343	0.233	0.187738	0.477
	1883	Lib7	Trm_gut	PTM_GAMMA_CARBOXYLATION_HYPUSINE_FORMATION_AND_ARYLSULFATASE_ACTIVATION	0.356709	0.237	0.238939	0.478
	1884	Lib7	Trm_gut	SYNTHESIS_OF_PIPS_AT_THE_PLASMA_MEMBRANE	0.254439	0.246	0.15696	0.599
	1885	Lib7	Trm_gut	SPHINGOLIPID_DE_NOVO_BIOSYNTHESIS	0.270219	0.259	0.250799	0.341
	1886	Lib7	Trm_gut	RIBOFLAVIN_METABOLISM	0.33142	0.261	0.165289	0.65
	1887	Lib7	Trm_gut	ABACAVIR_TRANSPORT_AND_METABOLISM	0.343149	0.262	0.277564	0.378
	1888	Lib7	Trm_gut	GLYOXYLATE_AND_DICARBOXYLATE_METABOLISM	0.28439	0.265	0.259368	0.338
	1889	Lib7	Trm_gut	O_GLYCAN_BIOSYNTHESIS	0.255956	0.271	0.138769	0.658
	1890	Lib7	Trm_gut	KERATAN_SULFATE_DEGRADATION	0.422061	0.284	0.599841	0.072
	1891	Lib7	Trm_gut	BILE_SALT_AND_ORGANIC_ANION_SLC_TRANSPORTERS	0.325128	0.285	0.359504	0.214
	1892	Lib7	Trm_gut	PANTOTHENATE_AND_COA_BIOSYNTHESIS	0.274687	0.294	0.224803	0.452
	1893	Lib7	Trm_gut	LYSINE_DEGRADATION	0.250713	0.296	0.30573	0.164
	1894	Lib7	Trm_gut	LIMONENE_AND_PINENE_DEGRADATION	0.331261	0.297	0.358065	0.219
	1895	Lib7	Trm_gut	SYNTHESIS_OF_BILE_ACIDS_AND_BILE_SALTS_VIA_24_HYDROXYCHOLESTEROL	0.306331	0.305	0.581598	0.012
	1896	Lib7	Trm_gut	CHREBP2_PATHWAY	0.364086	0.306	0.374194	0.291
	1897	Lib7	Trm_gut	GLUCOSE_TRANSPORT	0.276266	0.306	0.305014	0.248
	1898	Lib7	Trm_gut	ANDROGEN_BIOSYNTHESIS	0.369613	0.307	0.403286	0.266
	1899	Lib7	Trm_gut	GLUCURONIDATION	0.321115	0.31	0.196358	0.572
	1900	Lib7	Trm_gut	REGULATION_OF_GLUCOKINASE_BY_GLUCOKINASE_REGULATORY_PROTEIN	0.462115	0.323	0.694122	0.093
	1901	Lib7	Trm_gut	KETOLYSIS	0.401546	0.323	0.608056	0.092
	1902	Lib7	Trm_gut	ACTIVATION_OF_GENES_BY_ATF4	0.549109	0.329	0.728523	0.15
	1903	Lib7	Trm_gut	REGULATION_OF_INSULIN_SECRETION_BY_ACETYLCHOLINE	0.346454	0.33	0.611222	0.046
	1904	Lib7	Trm_gut	SYNTHESIS_OF_BILE_ACIDS_AND_BILE_SALTS_VIA_7ALPHA_HYDROXYCHOLESTEROL	0.26566	0.33	0.395222	0.103
	1905	Lib7	Trm_gut	POLYAMINE_SYNTHESIS	0.382216	0.334	0.273814	0.508
	1906	Lib7	Trm_gut	HIF_PATHWAY	0.330296	0.351	0.547481	0.064
	1907	Lib7	Trm_gut	REGULATION_OF_HYPOXIA_INDUCIBLE_FACTOR_HIF_BY_OXYGEN	0.278813	0.365	0.576067	0.02
	1908	Lib7	Trm_gut	INTEGRATION_OF_ENERGY_METABOLISM	0.195348	0.366	0.15837	0.538
	1909	Lib7	Trm_gut	ENDOCYTOSIS	0.380322	0.37	0.460164	0.273
	1910	Lib7	Trm_gut	BRANCHED_CHAIN_AMINO_ACID_CATABOLISM	0.249406	0.376	0.164926	0.634
	1911	Lib7	Trm_gut	KETOGENESIS	0.300577	0.413	0.587822	0.064
	1912	Lib7	Trm_gut	TYROSINE_METABOLISM	0.201181	0.426	0.197704	0.423
	1913	Lib7	Trm_gut	IONOTROPIC_ACTIVITY_OF_KAINATE_RECEPTORS	0.2911	0.429	0.376607	0.296
	1914	Lib7	Trm_gut	ETHANOL_OXIDATION	0.280733	0.429	0.474494	0.105
	1915	Lib7	Trm_gut	GLYCOLYSIS_GLUCONEOGENESIS	0.178897	0.429	0.239175	0.15
	1916	Lib7	Trm_gut	GLYCOGEN_BREAKDOWN_GLYCOGENOLYSIS	0.255544	0.446	0.587321	0.039
	1917	Lib7	Trm_gut	GLUTATHIONE_METABOLISM	0.178386	0.476	0.126666	0.714
	1918	Lib7	Trm_gut	TRANSPORT_OF_VITAMINS_NUCLEOSIDES_AND_RELATED_MOLECULES	0.179824	0.487	0.251769	0.274
	1919	Lib7	Trm_gut	ACTIVATION_OF_KAINATE_RECEPTORS_UPON_GLUTAMATE_BINDING	0.214053	0.509	0.405897	0.146
	1920	Lib7	Trm_gut	BETA_OXIDATION	0.16855	0.531	0.390934	0.013
	1921	Lib7	Trm_gut	STEROID_HORMONE_BIOSYNTHESIS	0.163996	0.538	0.240051	0.243
	1922	Lib7	Trm_gut	PYRUVATE_to_ACETYL_coA	0.256529	0.547	0.176568	0.695
	1923	Lib7	Trm_gut	GLYCOSAMINOGLYCAN_METABOLISM	0.147055	0.562	0.15418	0.529
	1924	Lib7	Trm_gut	CHYLOMICRON_MEDIATED_LIPID_TRANSPORT	0.190173	0.567	0.502118	0.044
	1925	Lib7	Trm_gut	ASCORBATE_AND_ALDARATE_METABOLISM	0.185294	0.572	0.179368	0.569
	1926	Lib7	Trm_gut	STARCH_AND_SUCROSE_METABOLISM	0.154554	0.581	0.210583	0.358
	1927	Lib7	Trm_gut	PHOSPHOLIPID_METABOLISM	0.13658	0.587	0.131445	0.616
	1928	Lib7	Trm_gut	METABOLISM_OF_CARBOHYDRATES	0.133019	0.594	0.149896	0.452
	1929	Lib7	Trm_gut	PHENYLALANINE_METABOLISM	0.166524	0.614	0.343966	0.148
	1930	Lib7	Trm_gut	GLYCEROPHOSPHOLIPID_BIOSYNTHESIS	0.142195	0.614	0.24724	0.087
	1931	Lib7	Trm_gut	LIPOPROTEIN_METABOLISM	0.161946	0.626	0.538837	0.002
	1932	Lib7	Trm_gut	PURINE_SALVAGE	0.164797	0.631	0.288861	0.314
	1933	Lib7	Trm_gut	PYRIMIDINE_CATABOLISM	0.173695	0.638	0.457554	0.074
	1934	Lib7	Trm_gut	LYSOSOME	0.138964	0.647	0.0950897	0.838
	1935	Lib7	Trm_gut	NUCLEARRS_PATHWAY	0.172209	0.65	0.38045	0.173
	1936	Lib7	Trm_gut	HYALURONAN_METABOLISM	0.168443	0.65	0.322045	0.284
	1937	Lib7	Trm_gut	SPHINGOLIPID_METABOLISM	0.13497	0.65	0.0819453	0.882
	1938	Lib7	Trm_gut	AMINO_ACID_AND_OLIGOPEPTIDE_SLC_TRANSPORTERS	0.136831	0.66	0.107186	0.767
	1939	Lib7	Trm_gut	PROLINE_SYNTHESIS	0.200066	0.665	0.537141	0.198
	1940	Lib7	Trm_gut	TRYPTOPHAN_METABOLISM	0.140334	0.668	0.316491	0.052
	1941	Lib7	Trm_gut	ETHER_LIPID_METABOLISM	0.137912	0.668	0.399793	0.019
	1942	Lib7	Trm_gut	PURINE_CATABOLISM	0.156717	0.674	0.417597	0.123
	1943	Lib7	Trm_gut	SYNTHESIS_OF_BILE_ACIDS_AND_BILE_SALTS	0.1404	0.681	0.492577	0.009
	1944	Lib7	Trm_gut	PRIMARY_BILE_ACID_BIOSYNTHESIS	0.15416	0.693	0.513983	0.008
	1945	Lib7	Trm_gut	SYNTHESIS_OF_PA	0.126479	0.693	0.341826	0.085
	1946	Lib7	Trm_gut	GLYCEROPHOSPHOLIPID_METABOLISM	0.125909	0.707	0.221888	0.184
	1947	Lib7	Trm_gut	BETA_ALANINE_METABOLISM	0.124194	0.714	0.44456	0.008
	1948	Lib7	Trm_gut	BUTANOATE_METABOLISM	0.126538	0.725	0.368966	0.028
	1949	Lib7	Trm_gut	GLUCOSE_METABOLISM	0.117941	0.727	0.269757	0.106
	1950	Lib7	Trm_gut	VALINE_LEUCINE_AND_ISOLEUCINE_DEGRADATION	0.117668	0.729	0.261449	0.13
	1951	Lib7	Trm_gut	GLUCONEOGENESIS	0.118961	0.74	0.277109	0.125
	1952	Lib7	Trm_gut	PEROXISOMAL_LIPID_METABOLISM	0.11501	0.743	0.39804	0.04
	1953	Lib7	Trm_gut	DIGESTION_OF_DIETARY_CARBOHYDRATE	0.138068	0.746	0.295126	0.461
	1954	Lib7	Trm_gut	PEROXISOME	0.113746	0.746	0.231464	0.306
	1955	Lib7	Trm_gut	GLYCOSPHINGOLIPID_METABOLISM	0.111061	0.772	0.0868028	0.833
	1956	Lib7	Trm_gut	FATTY_ACID_METABOLISM	0.107766	0.782	0.349152	0.039
	1957	Lib7	Trm_gut	LINOLEIC_ACID_METABOLISM	0.0968466	0.787	0.392835	0.037
	1958	Lib7	Trm_gut	TANDEM_PORE_DOMAIN_POTASSIUM_CHANNELS	0.0989632	0.812	0.318255	0.254
	1959	Lib7	Trm_gut	CHONDROITIN_SULFATE_DERMATAN_SULFATE_METABOLISM	0.0992654	0.813	0.290917	0.141
	1960	Lib7	Trm_gut	HISTIDINE_METABOLISM	0.104254	0.815	0.384933	0.072
	1961	Lib7	Trm_gut	ALPHA_LINOLENIC_ACID_METABOLISM	0.0958413	0.815	0.265864	0.208
	1962	Lib7	Trm_gut	BILE_ACID_AND_BILE_SALT_METABOLISM	0.0888411	0.817	0.44031	0.012
	1963	Lib7	Trm_gut	METABOLISM_OF_STEROID_HORMONES_AND_VITAMINS_A_AND_D	0.086031	0.828	0.402563	0.038
	1964	Lib7	Trm_gut	HEPARAN_SULFATE_HEPARIN_HS_GAG_METABOLISM	0.0902738	0.829	0.231044	0.286
	1965	Lib7	Trm_gut	AMINO_ACID_SYNTHESIS_AND_INTERCONVERSION_TRANSAMINATION	0.0892441	0.83	0.337111	0.17
	1966	Lib7	Trm_gut	ABC_TRANSPORTERS	0.0883384	0.841	0.318686	0.049
	1967	Lib7	Trm_gut	PYRUVATE_METABOLISM	0.092895	0.85	0.201307	0.338
	1968	Lib7	Trm_gut	NITRIC_OXIDE_STIMULATES_GUANYLATE_CYCLASE	0.0773369	0.86	0.3172	0.142
	1969	Lib7	Trm_gut	SYNTHESIS_OF_PC	0.0807916	0.862	0.363403	0.1
	1970	Lib7	Trm_gut	TRIGLYCERIDE_BIOSYNTHESIS	0.0752102	0.871	0.221147	0.312
	1971	Lib7	Trm_gut	GLYCINE_SERINE_AND_THREONINE_METABOLISM	0.0775172	0.872	0.314259	0.084
	1972	Lib7	Trm_gut	DRUG_METABOLISM_OTHER_ENZYMES	0.0742791	0.874	0.277013	0.166
	1973	Lib7	Trm_gut	ION_CHANNEL_TRANSPORT	0.078339	0.876	0.222218	0.244
	1974	Lib7	Trm_gut	LIPID_DIGESTION_MOBILIZATION_AND_TRANSPORT	0.0808127	0.879	0.419983	0.013
	1975	Lib7	Trm_gut	TAURINE_AND_HYPOTAURINE_METABOLISM	0.0698138	0.881	0.452015	0.083
	1976	Lib7	Trm_gut	SYNTHESIS_OF_PE	0.0611702	0.886	0.301048	0.333
	1977	Lib7	Trm_gut	SYNTHESIS_OF_VERY_LONG_CHAIN_FATTY_ACYL_COAS	0.0620085	0.891	0.143924	0.644
	1978	Lib7	Trm_gut	GLYCEROLIPID_METABOLISM	0.0712126	0.894	0.330902	0.034
	1979	Lib7	Trm_gut	PROPANOATE_METABOLISM	0.063475	0.898	0.296129	0.128
	1980	Lib7	Trm_gut	PASSIVE_TRANSPORT_BY_AQUAPORINS	0.052901	0.902	0.435885	0.119
	1981	Lib7	Trm_gut	METABOLISM_OF_XENOBIOTICS_BY_CYTOCHROME_P450	0.0635713	0.909	0.356146	0.025
	1982	Lib7	Trm_gut	ARACHIDONIC_ACID_METABOLISM	0.0624703	0.911	0.214586	0.288
	1983	Lib7	Trm_gut	FATTY_ACID_TRIACYLGLYCEROL_AND_KETONE_BODY_METABOLISM	0.0729117	0.919	0.181501	0.321
	1984	Lib7	Trm_gut	DRUG_METABOLISM_CYTOCHROME_P450	0.0620938	0.919	0.377272	0.008
	1985	Lib7	Trm_gut	RETINOL_METABOLISM	0.0607787	0.928	0.227117	0.255
	1986	Lib7	Trm_gut	AMINE_COMPOUND_SLC_TRANSPORTERS	0.0513798	0.932	0.269004	0.203
	1987	Lib7	Trm_gut	OTHER_GLYCAN_DEGRADATION	0.0366443	0.942	0.156363	0.645
	1988	Lib7	Trm_gut	PPAR_SIGNALING_PATHWAY	0.0537969	0.946	0.299982	0.034
	1989	Lib7	Trm_gut	TRYPTOPHAN_CATABOLISM	0.0357385	0.949	0.368379	0.23
	1990	Lib7	Trm_gut	NITROGEN_METABOLISM	0.0330162	0.955	0.142922	0.655
	1991	Lib7	Trm_gut	ARGININE_AND_PROLINE_METABOLISM	0.0407984	0.96	0.352968	0.008
	1992	Lib7	Trm_gut	TRANSPORT_OF_GLUCOSE_AND_OTHER_SUGARS_BILE_SALTS_AND_ORGANIC_ACIDS_METAL_IONS_AND_AMINE_COMPOUNDS	0.0507046	0.97	0.253063	0.043
	1993	Lib7	Trm_gut	METABOLISM_OF_LIPIDS_AND_LIPOPROTEINS	0.0748263	0.975	0.156321	0.291
	1994	Lib7	Trm_gut	METAL_ION_SLC_TRANSPORTERS	0.0240362	0.979	0.244233	0.317
	1995	Lib7	Trm_gut	FATTY_ACID_ACTIVATION_UPTAKE	0.0136394	0.979	0.575173	0.006
	1996	Lib7	Trm_gut	MITOCHONDRIAL_FATTY_ACID_BETA_OXIDATION	0.00865513	0.981	0.534896	0.005
	1997	Lib7	Trm_gut	POTASSIUM_CHANNELS	0.0248981	0.99	0.270485	0.031
	1998	Lib7	Trm_gut	TRANSMEMBRANE_TRANSPORT_OF_SMALL_MOLECULES	0.0481501	0.999	0.166981	0.187
	1999	Lib7	Trm_gut	VOLTAGE_GATED_POTASSIUM_CHANNELS	0.00067227	0.999	0.236239	0.202
[truncated: 401 more rows]

## Sheet: Patient info for mIHC
	Number	Sex	Age, years	HBsAg (Pos + / Neg -)	TB (μmol/L)	AFP (ng/mL)	ALB (g/dL)	ALT (U/L)	T Stage	N Stage	M Stage
	1	Female	70	-	12.1	4	4.5	23	T1	N0	M0
	2	Male	59	+	23.5	12	3.7	235	T1	N0	M0
	3	Male	78	_	12.3	2	5	20	T1	N0	M0
	4	Male	46	+	8.3	2530	5.4	22	T1	N0	M0
	5	Male	38	+	18.6	46	4	33	T2	N0	M0
	6	Male	56	-	16.2	166	5.1	24	T2	N0	M0
	7	Male	56	+	4.8	22	5	47	T2	N0	M0
	8	Male	50	-	14.2	176	4.4	25	T1	N0	M0
	9	Female	66	-	11.5	2446	4.4	19	T1	N0	M0
	10	Male	49	+	13.1	4629	5	73	T1	N0	M0
	11	Male	54	+	16.6	400	4.6	18	T2	N0	M0
	12	Male	42	+	18.8	523	4.1	99	T1	N0	M0
	13	Female	76	+	11.1	3700	4.2	24	T1	N0	M0
	14	Male	64	+	19.2	8	4.7	20	T3	N0	M0
	15	Male	34	+	16.3	60500	4.7	21	T1	N0	M0
	16	Male	71	-	23.7	2	4.7	88	T2	N0	M0
	17	Male	47	+	20.7	868	4	24	T1	N0	M0
	18	Male	68	+	12.2	8400	6.5	15	T2	N0	M0
	19	Male	52	+	13	8	4.4	56	T1	N0	M0
	20	Male	77	-	12.5	179	3.8	19	T1	N0	M0
	21	Male	51	+	13.4	17	4.2	45	T1	N0	M0
	22	Male	54	-	19.9	1	4.9	27	T1	N0	M0
	23	Male	69	+	9.7	1114	4.6	44	T2	N0	M0
	24	Male	47	+	7.7	1868	4.3	41	T1	N0	M0
	25	Female	64	+	11.3	456	4.4	36	T2	N0	M0
	26	Male	32	+	22.4	52850	4.6	69	T2	N0	M0
	27	Male	51	-	19.3	3	4.7	33	T1	N0	M0
	28	Male	57	+	23.6	5	4.5	39	T1	N0	M0
	29	Male	31	+	24.1	7380	4.3	29	T2	N0	M0
	30	Male	67	+	32	7	4.9	51	T1	N0	M0
	31	Male	52	-	9.4	5	4.4	64	T1	N0	M0
	32	Male	57	+	12.6	31	4.6	32	T1	N0	M0
	33	Male	44	+	13.6	16	4.5	38	T1	N0	M0
	34	Male	52	+	14.1	85	4.3	18	T1	N0	M0
	35	Male	67	+	19.7	8	4.8	59	T2	N0	M0
	36	Male	66	+	21.6	15	4.5	51	T1	N0	M0
	37	Male	39	+	18.4	2566	5	72	T1	N0	M0
	38	Male	55	+	23.4	137	4.5	116	T1	N0	M0
	39	Male	60	-	14.3	60500	3.9	12	T1	N0	M0
	40	Male	48	+	16.5	60500	4.2	267	T1	N0	M0
	41	Male	49	+	6.9	3748	3.8	42	T1	N0	M0
	42	Male	45	+	10.9	2	4	51	T1	N0	M0
	43	Male	32	+	7.5	2	4.7	25	T1	N0	M0
	44	Female	47	+	10.6	600	4.7	14	T1	N0	M0
	45	Male	47	+	13.4	158	4.2	136	T2	N0	M0
	46	Male	56	-	9	1	4.3	74	T1	N0	M0
	47	Male	42	+	8.5	108	3.9	54	T2	N0	M0
	48	Male	48	+	13.8	419	4.1	41	T1	N0	M0
	49	Male	50	+	13.1	5	4.2	179	T1	N0	M0
	50	Male	47	+	8.3	1172	4.9	35	T2	N0	M0
	51	Male	59	-	33.2	1566	4.2	71	T3	N0	M0
	52	Male	58	+	24.3	2	4.3	83	T1	N0	M0
	53	Male	44	+	10.6	1667	4.4	46	T2	N0	M0
	54	Male	56	+	12.8	9	4.3	57	T2	N0	M0
	55	Male	56	-	6.6	4	3.8	18	T2	N0	M0
	56	Male	47	+	5.7	12360	4.2	29	T1	N0	M0
	57	Male	53	+	25.8	73	3.8	44	T2	N0	M0
	58	Female	45	+	10.9	60500	3.6	105	T1	N0	M0
	59	Male	52	+	10.2	93	4.6	30	T1	N0	M0
	60	Male	52	+	15.2	274	4.3	25	T3	N0	M0
	61	Male	64	-	10	635	4	17	T2	N0	M0
	62	Male	41	+	10.2	40	3.7	57	T1	N0	M0
	63	Male	60	+	10.4	8	4.1	53	T1	N0	M0
	64	Male	55	+	3.8	10	4.2	21	T2	N0	M0
	65	Male	58	-	10.5	2	4.4	32	T2	N0	M0
	66	Male	48	+	12.1	1	4.5	35	T2	N0	M0
	67	Male	48	+	12.6	1721	3.7	71	T1	N0	M0
	68	Male	48	+	26.1	306	3.8	23	T1	N0	M0
	69	Female	67	-	9.1	2	3.9	12	T2	N0	M0
	70	Male	33	+	11.4	67	4.3	35	T2	N0	M0
	71	Male	32	+	22.2	12	4.2	24	T2	N0	M0
	72	Male	46	+	11.6	37	4.1	21	T1	N0	M0
	73	Female	52	+	7.4	3	3.6	40	T2	N0	M0
	74	Male	41	+	24.4	1	4.2	58	T1	N0	M0
	75	Male	64	+	15.7	6	3.3	19	T1	N0	M0
	76	Male	53	+	12.4	699	3.9	16	T1	N0	M0
	77	Male	66	-	6	3699	3.7	24	T1	N0	M0
	78	Male	44	+	10.8	5148	3.8	21	T1	N0	M0
	79	Male	52	+	9	7100	4.5	25	T1	N0	M0
	80	Male	43	+	6.6	17	3.7	120	T1	N0	M0
	81	Male	66	+	13	3	4.1	30	T1	N0	M0
	82	Male	44	+	13.1	5	4.3	37	T1	N0	M0
	83	Male	60	+	6.4	3	2.8	32	T2	N0	M0
	84	Male	55	+	9.6	2	3.8	22	T1	N0	M0
	85	Male	33	+	19.2	27	3.9	31	T2	N0	M0
	86	Male	61	+	14.5	242	4.3	71	T1	N0	M0
	87	Male	53	+	12.3	242	4.1	35	T2	N0	M0
	88	Female	44	-	9.9	504	4.9	27	T1	N0	M0
	89	Male	50	+	7.2	815	4.7	75	T1	N0	M0

## Sheet: Patient info for Nivolumab
	Number	Two largest perpendicular dameters (SPD)		Change from baseline SPD	AFP (ng/mL)		Change from baseline AFP	UICC 8th Grade	Pathology-sample out		Pathological tumor response
		Before 1Rx	Before resection		Before 1Rx	Before resection			Necrotic area	Characteristics
	2	9.6	9	-0.0625	163	5	-0.964	Stage IIIB	1	Large number of lymphocytes and macrophages are presented within the necrotic tumor	CR
	3	29.2	30	0.0274	3	2	-0.333	Stage IIIA	0.35	Multi-lobulated tumor	SD
	5	18.1	18.8	0.0387	15108	13162	-0.1288	Stage IIIB	0.2	Venous invasion and tumor micro satellite formation	SD
	6	28.7	29.8	0.0383	25	25	0	Stage II	0.6	Venous invasion	PR
	7	34	28	-0.1765	34106	6309	-0.815	Stage II	0.8	Venous invasion, stromal fibrosis, hyalinization, ductular reaction	PR
	8	23.5	24.9	0.0596	2	2	0	Stage II	0.35	Venous invasion and tumor micro satellite formation	SD
	10	15.1	16	0.0596	198	360	0.8182	Stage IIIA	0.05	Venous invasion and tumor micro satellite formation	SD
	13	23.7	23.9	0.0084	5	6	0.2	Stage IIIA	0.6	Venous invasion and tumor micro satellite formation	PR

## Sheet: Public database 
	Name	Description	Link
	Database/Dataset
	GSE151530	Single-cell transcriptomic profiling of liver cancer biospecimens (n = 46) from hepatocellular carcinoma and intrahepatic cholangiocarcinoma patients.	https://www.ncbi.nlm.nih.gov/geo/query/acc.cgi?acc=GSE151530
	GSE45267	In this dataset, a total of 87 gene expression profiles of tissue samples were collected, which containing 48 primary HCC samples, as well as those of 39 non-cancerous tissues, from 61 patients. HCC tissues were collected from 16 young HCC and 32 elder HCC patients.	https://www.ncbi.nlm.nih.gov/geo/query/acc.cgi?acc=GSE45267
	GSE63898	Genome-wide expression analysis of 228 hepatocellular carcinoma and 168 cirrhotic samples as part of a integrated study of gene expression and DNA-methylation de-regulation in patients with hepatocellular carcinoma Analysis of whole-genome transcriptome changes in human samples from hepatocellular carcinoma patients.	https://www.ncbi.nlm.nih.gov/geo/query/acc.cgi?acc=GSE63898
	GSE144269	Paired tumor/non-tumor liver tissue samples from a cohort of 76 hepatocellular carcinoma patients undergoing surgery between 2015 and 2016 at the National Cancer Center of Mongolia were sequenced with RNA-Seq and Whole Exome Sequencing (WES). This submission consists of 140 RNA-seq samples from 70 HCC tumors and matched nontumor tissue.	https://www.ncbi.nlm.nih.gov/geo/query/acc.cgi?acc=GSE144269
	GSE22058	For human HCC patient samples, 192 samples -- 96 resected tumor and 96 adjacent non-tumor liver tissues -- were collected from 96 patients who had undergone hepatectomy for curative treatment of HCC at Queen Mary Hospital, Pokfulam, Hong Kong between 1990 and 2007. Informed consents were obtained from patients regarding the use of the liver specimens for research. Samples were hybridized to Affym…	https://www.ncbi.nlm.nih.gov/geo/query/acc.cgi?acc=GSE22058
	GSE102079	A total of 152 patients who underwent curative hepatic resection for HCC between 2006 and 2011 at Tokyo Medical and Dental University Hospital participated in integrated gene expression microarray analysis.	https://www.ncbi.nlm.nih.gov/geo/query/acc.cgi?acc=GSE102079
	GSE89377	107 samples covering 9 stages of HCC. Normal liver were used as control.	https://www.ncbi.nlm.nih.gov/geo/query/acc.cgi?acc=GSE89377
	GSE107170	A data matrix with the log2 RMA data for all 307 HCC samples is available on the series record.	https://www.ncbi.nlm.nih.gov/geo/query/acc.cgi?acc=GSE107170
	GSE65484	50 Chinese Hepatocellular Carcinoma patients and 14 adjacent tissues using Agilent 244K array CGH technology. 50 Tumor samples also did RNASeq profiling	https://www.ncbi.nlm.nih.gov/geo/query/acc.cgi?acc=GSE65484
	ICGC-LIRI-JP	RIKEN collection WGS reads for 100 HCC and matched blood samples from 50 donors submitted to ICGC for release 16.	https://ega-archive.org/datasets/EGAD00001000842
	GSE233388	Purified CD8 T cells from the spleens of chronically LCMV-infected mice were mixed 1:1 with unlabeled naive splenocytes as feeder cells and cultured with recombinant murine IL-15 (Peprotech) for 3 days. From pre- and post- IL-15-cultured cells, live CD8+PD-1+(GP33+GP276)+ cells were sorted using BD FACSAriaTM III Flow Cytometer (BD Biosciences) of the BIORP. Naïve CD8 T cells (live CD8+PD-1-CD44l…	https://www.ncbi.nlm.nih.gov/geo/query/acc.cgi?acc=GSE233388
	Online tools
	Cancer Immunology Data Engine (CIDE)	Aims to help researchers and immune oncologists identifying new regulators of tumor immune evasions and cancer immunotherapy resistance.	https://cide.ccr.cancer.gov/
	Functional Immunogenomics and Transcriptomics database (FITdb)	The goal of FIT.db is to offer an intuitive and interactive user interface to visualize gene essentiality data from CRISPR-Cas9-based functional screens integrated with gene expression profiles for T cell subsets in the context of infection and cancer.	https://fitdb.lji.org/
	Integrative HCC Gene Analysis (IHGA)	IHGA (Integrative HCC Gene Analysis) is a newly developed R shiny interactive web server for analyzing the gene expression data of large-scale hepatocellular carcinoma (HCC)-related datasets using a standard R processing pipeline.	https://www.hccdatasph.cn/app/ihga
	Integrative Molecular Database of Hepatocellular Carcinoma (HCCDB)	The HCCDB v2.0 has added 11 new bulk transcriptomic datasets with 6 new clinical phenotypes to the 15 datasets in the original version, including bulk RNA expression datasets, single-cell RNA-Seq datasets, and spatial transcriptmics.	http://lifeome.net:809/#/home
	Talk2Data	The cross-database analysis of single cell and spatial data on the web.	https://bioturing.com/talk2data
