# Supplementary material for: Tumor arachidonic acid synthesis impairs metabolic fitness of CXCR6+ resident memory CD8+ T cells and drives immunotherapy resistance in hepatocellular carcinoma
Source: Research Square preprint supplement (doi:10.21203/rs.3.rs-7535111/v1), 2025-09-24
Supplement: Supplementary file 2 [file fe77330c1011d5d79917205e.docx]

**1.1 Antibodies**

| **Name** | **Supplier** | **Cat no.** | **Clone no.** |
| --- | --- | --- | --- |
| Anti-mouse CD45 BUV395 | BD Biosciences | Cat# 564279 | 30-F11 |
| Anti-mouse CD8 BUV496 | BD Biosciences | Cat# 750024 | 53-6.7 |
| Anti-mouse CD8 APC-H7 | BD Biosciences | Cat# 560247 | 53-6.7 |
| Anti-mouse CD45.2 BUV563 | BD Biosciences | Cat# 741273 | 104 |
| Anti-mouse CD44 BUV661 | BD Biosciences | Cat# 741471 | IM7 |
| Anti-mouse CD45.1 BUV805 | BD Biosciences | Cat# 741958 | A20 |
| Anti-mouse TIGIT BV421 | BD Biosciences | Cat# 565270 | 1G9 |
| Anti-mouse LAG-3 BV480 | BD Biosciences | Cat# 746508 | C9B7W |
| Anti-mouse PD-1 BV605 | BD Biosciences | Cat# 563059 | MP6-XT22 |
| Anti-mouse NK1.1 BV650 | BD Biosciences | Cat# 564143 | PK136 |
| Anti-mouse CD62L BV711 | BD Biosciences | Cat# 568286 | MEL-14 |
| Anti-mouse TCRβ BV786 | BD Biosciences | Cat# 742484 | 17A3 |
| Anti-mouse TIM-3 BB515 | BD Biosciences | Cat# 567810 | 5D12/TIM-3 |
| Anti-mouse TNFα PE | BD Biosciences | Cat# 554419 | MP6-XT22 |
| Anti-mouse CD69 BB630 | BD Biosciences | Customized | H1.2F3 |
| Anti-mouse CD103 BB700 | BD Biosciences | Cat# 748240 | 2E7 |
| Anti-mouse Ki-67 RY586 | BD Biosciences | Cat# 568147 | B56 |
| Anti-mouse IFNγ PE-CF594 | BD Biosciences | Cat# 562333 | XMG1.2 |
| Anti-mouse CD4 R718 | BD Biosciences | Cat# 566939 | GK1.5 |
| Anti-mouse TOX BUV737 | BD Biosciences | Cat# 624286 | NAN448B |
| Anti-human CD8 BV786 | BD Biosciences | Cat# 563823 | RPA-T8 |
| Anti-human IFNγ BUV805 | BD Biosciences | Cat# 569652 | 4S.B3 |
| Anti-human TNFα APC | BD Biosciences | Cat# 562084 | MAb11 |
| Anti-human CD4 R718 | BD Biosciences | Cat# 567092 | RPA-T4 |
| Anti-mouse CXCR6 PE-Cy7 | Biolegend | Cat# 151119 | SA051D1 |
| Anti-mouse CD45 AF700 | Biolegend | Cat# 147716 | I3/2.3 |
| Anti-mouse TCRβ chain PE/Dazzle 594 | Biolegend | Cat# 109240 | H57-597 |
| Anti-mouse CD4 BV605 | Biolegend | Cat# 100547 | RM4-5 |
| Anti-mouse CD8 PE-Cy7 | Biolegend | Cat# 100722 | 53-6.7 |
| Anti-mouse CD44 BV650 | Biolegend | Cat# 103049 | IM7 |
| Anti-mouse CD62L BV785 | Biolegend | Cat# 104440 | MEL-14 |
| Anti-mouse CD69 PerCP/Cy5.5 | Biolegend | Cat# 104522 | H1.2F3 |
| Anti-mouse CD103 BV711 | Biolegend | Cat# 121435 | 2E7 |
| Anti-mouse CD3ζ FITC | Biolegend | Cat# 100306 | 145-2C11 |
| Anti-human CD103 BV711 | Biolegend | Cat# 350222 | Ber-ACT8 |
| Anti-human Tim-3 BV510 | Biolegend | Cat# 345030 | F38-2E2 |
| Anti-human/mouse Granzyme B FITC | Biolegend | Cat# 372206 | QA16A02 |
| Anti-human PD-1 PerCP/Cy5.5 | Biolegend | Cat# 367410 | NAT105 |
| Anti-human CD45 UV387 | Biolegend | Cat# 304086 | HI30 |
| Anti-human TCRα/β PE/Dazzle 594 | Biolegend | Cat# 306726 | IP26 |
| Anti-human CD56 BV650 | Biolegend | Cat# 362532 | 5.1H11 |
| Anti-human CXCR6 BV421 | Biolegend | Cat# 356014 | K041E5 |
| Anti-human CD95 PE-Cy7 | Biolegend | Cat# 305622 | DX2 |
| Anti-human CD27 PE-Cy5 | Biolegend | Cat# 302858 | O323 |
| Anti-human CD45RO APC/Fire 750 | Biolegend | Cat# 304250 | UCHL1 |
| Anti-human CD62L BV605 | Biolegend | Cat# 304834 | DREG-56 |
| Anti-human CD69 PE | Biolegend | Cat# 310906 | FN50 |
| CD8α XP® Rabbit mAb | Cell Signaling Technology | Cat# 98941 | D4W2Z |
| CD8α XP® Rabbit mAb | Cell Signaling Technology | Cat# 85336 | D8A8Y |
| CD4 Rabbit mAb | Cell Signaling Technology | Cat# 25229 | D7D2Z |
| CD3ζ Rabbit mAb | Cell Signaling Technology | Cat# 99940 | D4V8L |
| PD-1 XP® Rabbit mAb | Cell Signaling Technology | Cat# 84651 | D4W27 |
| TIM-3 XP® Rabbit mAb | Cell Signaling Technology | Cat# 83882 | D3M9R |
| CXCR6 Polyclonal Antibody | Invitrogen | Cat# PA5-79117 | N/A |
| Recombinant anti-FADS1 antibody | Abcam | Cat# ab126706 | EPR6898 |
| Recombinant PE anti-FADS1 antibody | Abcam | Cat# ab305988 | EPR6898 |
| Recombinant Alexa Fluor 488 anti-Glypican 3 antibody | Abcam | Cat# ab314880 | SP86 |
| Recombinant anti-CXCR6 antibody | Abcam | Cat# ab273116 | EPR24686-113 |
| Recombinant anti-CD69 antibody | Abcam | Cat# ab233396 | EPR21814 |
| FADS1 Recombinant Rabbit Monoclonal Antibody | Invitrogen | MA5-42500 | JE55-63 |
| HRP-conjugated Beta Actin Monoclonal antibody | Proteintech | Cat# HRP-60008 | N/A |
| OVA257-264 (SIINFEKL) peptide bound to H-2Kb Monoclonal Antibody, APC | Invitrogen | Cat# 17-5743-82 | 25-D1.16 |
| *InVivo*MAb anti-mouse CD8α | Bio X Cell | Cat# BE0061 | 2.43 |
| *InVivo*MAb anti-mouse CD122 | Bio X Cell | Cat# BE0272 | 5H4 |
| *InVivo*MAb anti-mouse IL-15 | Bio X Cell | Cat# BE0315 | AIO.3 |
| *InVivo*MAb anti-mouse PD-1 | Bio X Cell | Cat# BE0146 | RMP1-14 |
| *InVivo*MAb anti-mouse CD4α | Bio X Cell | Cat# BE0003 | GK1.5 |
| *InVivo*MAb anti-mouse NK1.1 | Bio X Cell | Cat# BE0036 | PK136 |
| *InVivo*MAb anti-mouse F4/80 | Bio X Cell | Cat# BE0206 | CI:A3-1 |
| *InVivo*MAb anti-mouse Ly6G | Bio X Cell | Cat# BE0075-1 | 1A8 |
| *InVivo*MAb anti-mouse GR-1 | Bio X Cell | Cat# BE0075 | RB6-8C5 |
| *InVivo*MAb anti-mouse CD20 | Bio X Cell | Cat# BE0356 | MB20-11 |
| *InVivo*MAb rat IgG2a, κ isotype control | Bio X Cell | Cat# BE0089 | 2A3 |

**1.2 Cell lines**

| **Name** | **Supplier** | **Cat no.** | **Passage no.** | **Authentication test method** |
| --- | --- | --- | --- | --- |
| Human cell line: 293T | ATCC | Cat# CRL-3216 | 5-10 | STR |
| Mouse cell line: RIL-175 | The University of Hong Kong | N/A | 5-10 | N/A |
| Mouse cell line: RIL-175-OVA | N/A | N/A | 5-10 | N/A |
| Human cell line: Huh-7 | The University of Hong Kong | N/A | 5-10 | STR |
| Mouse cell line: Hepa1-6 | ATCC | Cat# CRL-1830 | 5-10 | STR |

**1.3 Mice strains**

| **Name** | **Supplier** | **Strain** | **Sex** | **Age** |
| --- | --- | --- | --- | --- |
| Mouse: C57BL/6J | CCMR | C57BL/6 | Both | 6-8 weeks |
| Mouse: NOD-*scid* *IL2Rgammanull* (NSG) | CCMR | NSG | Both | 4-5 weeks |
| Mouse: NU/J (Nude) | CCMR | Nude | Both | 5-6 weeks |
| Mouse: C57BL/6-Tg (*TcraTcrb*)1100Mjb/J (OT-I) | The Jackson Laboratory | C57BL/6 | Both | 8-10 weeks |
| Mouse: B6.SJL-*Ptprca* *Pepcb*/BoyJ (CD45.1) | The Jackson Laboratory | C57BL/6 | Both | 8-10 weeks |
| Mouse: OT-1 x CD45.1 | CCMR | C57BL/6 | Both | 8-10 weeks |
| Mouse: B6.129S7-*Rag1tm1Mom*/J (*Rag1* KO, *Rag1-/-*) | The Jackson Laboratory | C57BL/6 | Both | 6-8 weeks |

**1.4 Biological samples**

| **Description** | **Source** | **Identifier** |
| --- | --- | --- |
| Healthy adult liver biopsy from living-donor liver transplantation | Queen Mary Hospital, The University of Hong Kong | N/A |
| Human fresh paired HCC tissues with tumor and non-tumor | Queen Mary Hospital, The University of Hong Kong | N/A |
| Human HCC paraffin blocks | Surgical Tissue Bank, The University of Hong Kong | https://www.surgery.hku.hk/en/Research/Basic-Translational-Research/Research-Laboratories/Surgical-Tissue-Bank |
| Healthy adult peripheral blood | Queen Mary Hospital, The University of Hong Kong | N/A |
| HCC tissue array | Shanghai Outdo Biotech | Cat# HLivH180Su17 |
| Patient-derived xenograft | This paper | N/A |
| Patient-derived orthotopic xenograft | This paper | N/A |

**1.5 Others (drugs, proteins, vectors, etc)**

| **Name** | **Supplier** | **Cat no.** |
| --- | --- | --- |
| **Chemicals, peptides, and recombinant proteins** | | |
| Fixable Viability Stain 440UV | BD Biosciences | Cat# 566332 |
| Fixable Viability Stain 660 | BD Biosciences | Cat# 564405 |
| Zombie Violet Fixable Viability Kit | Biolegend | Cat# 423113 |
| Zombie Aqua Fixable Viability Kit | Biolegend | Cat# 423101 |
| Zombie Yellow Fixable Viability Kit | Biolegend | Cat# 423103 |
| OVA 257-264 Chicken egg albumin peptide | InvivoGen | Cat# vac-sin |
| D5D-IN-326 | MedChemExpress | Cat# HY-117427 |
| Corn oil | MedChemExpress | Cat# HY-Y1888 |
| Recombinant Mouse IL-15 (carrier-free) | Biolegend | Cat# 566304 |
| Bovine Serum Albumin Solution (fatty acid free) | Sigma-Aldrich | Cat# A1595 |
| Corning Matrigel Basement Membrane Matrix | Corning | Cat# 354234 |
| RIPA Buffer (10X) | Cell Signaling Technology | Cat# 9806 |
| PE-Labeled Human Glypian 3/GPC3 Protein, His Tag (Site-specific conjugation) | ACROBiosystems | Cat# GP3-HP2E3 |
| D-Luciferin potassium salt | BOC Sciences | Cat# 115144-35-9 |
| Polybrene Infection/Transfection Reagent | Millipore | Cat# TR-1003-G |
| Cell Proliferation Kit II (XTT) | Roche | Cat# 11465015001 |
| Human IL-2 IS, premium grade | Miltenyi Biotec | Cat# 130-097-745 |
| Mouse IL-2 IS, premium grade | Miltenyi Biotec | Cat# 130-120-332 |
| Human IL-7, premium grade | Miltenyi Biotec | Cat# 130-095-361 |
| Human IL-15, premium grade | Miltenyi Biotec | Cat# 130-095-762 |
| IL-2 Protein, Mouse | MedChemExpress | Cat# HY-P7077 |
| IL-7 Protein, Mouse | MedChemExpress | Cat# HY-P73226 |
| Il-12 Protein, Mouse | MedChemExpress | Cat# HY-P7208 |
| IL-15R alpha & IL-15 Protein, Mouse | MedChemExpress | Cat# HY-P78558 |
| MitoTracker™ Green FM Dye, for flow cytometry | Invitrogen | Cat# M46750 |
| MitoTracker™ Orange CMTMRos | Invitrogen | Cat# M7510 |
| Linoleic Acid-Water Soluble | Sigma-Aldrich | Cat# L5900 |
| Palmitic acid, BioXtra | Sigma-Aldrich | Cat# P5585 |
| Oleic acid, BioReagent | Sigma-Aldrich | Cat# O1383 |
| Linolenic acid | Sigma-Aldrich | Cat# L2376 |
| Dihomo-γ-Linolenic Acid | Cayman Chemical | Cat# CAY90230 |
| γ-Linolenic Acid | Cayman Chemical | Cat# CAY90220 |
| Eicosatetraenoic Acid | Cayman Chemical | Cat# CAY90120 |
| Arachidonic acid | MedChemExpress | Cat# HY-109590 |
| **Critical commercial assays** | | |
| Arachidonic Acid ELISA Kit | Abcam | Cat# ab287798 |
| Prostaglandin E2 ELISA Kit | Abcam | Cat# ab287802 |
| Tumor Dissociation Kit, human | Miltenyi Biotec | Cat# 130-095-929 |
| Tumor Dissociation Kit, mouse | Miltenyi Biotec | Cat# 130-086-730 |
| CD8+ T Cell Isolation Kit, human | Miltenyi Biotec | Cat# 130-096-495 |
| CD8+ T Cell Isolation Kit, mouse | Miltenyi Biotec | Cat# 130-116-478 |
| Naïve CD8a+ T Cell Isolation Kit, mouse | Miltenyi Biotec | Cat# 130-096-543 |
| Debris Removal Solution | Miltenyi Biotec | Cat# 130-109-398 |
| FCR Blocker Reagent, human | Miltenyi Biotec | Cat# 130-059-901 |
| FCR Blocker Reagent, mouse | Miltenyi Biotec | Cat# 130-092-575 |
| T Cell TransAct, human | Miltenyi Biotec | Cat# 130-111-160 |
| EndoFree Plasmid Maxi Kit | QIAGEN | Cat# 12362 |
| RNeasy Plus Mini Kit | QIAGEN | Cat# 74134 |
| Plasmid Midi Kit | QIAGEN | Cat# 12125 |
| Pierce BCA Protein Assay Kit | Thermo Scientific | Cat# 23225 |
| Seahorse XFe96/XF Pro PDL Plates | Agilent | Cat# 103799-100 |
| Seahorse XF Palmitate Oxidation Stress Test Kit | Agilent | Cat# 103693-100 |
| Seahorse XF Cell Mito Stress Test Kit | Agilent | Cat# 103015-100 |
| TexMACS GMP Medium (Phenol Red) | Miltenyi Biotec | Cat# 170-076-309 |
| Flex-T Biotin H-2 K(b) OVA Monomer (SIINFEKL) | Biolegend | Cat# 280051 |
| APC Streptavidin | Biolegend | Cat# 405207 |
| PE Streptavidin | Biolegend | Cat# 405204 |
| Cell Activation Cocktail (with Brefeldin A) | Biolegend | Cat# 423304 |
| Protease/Phosphatase Inhibitor Cocktail (100X) | Cell Signaling Technology | Cat# 5872 |
| Opal 6-Plex Manual Detection Kit – for Whole Slide Imaging | AKOYA BIOSCIENCES | Cat# NEL861001KT |
| Q5® High-Fidelity 2X Master Mix | NEW ENGLAND Biolabs | Cat# M0492S |
| Percoll® PLUS | Sigma-Aldrich | Cat# GE17-5445-01 |
| SignalStain® Boost IHC Detection Reagent (HRP, Mouse) | Cell Signaling Technology | Cat# 8125 |
| SignalStain® Boost IHC Detection Reagent (HRP, Rabbit) | Cell Signaling Technology | Cat# 8114 |
| SignalStain® DAB Substrate Kit | Cell Signaling Technology | Cat# 8059 |
| SignalStain® Citrate Unmasking Solution | Cell Signaling Technology | Cat# 14746 |
| SignalStain® EDTA Unmasking Solution | Cell Signaling Technology | Cat# 14747 |
| SignalStain® Mounting Medium | Cell Signaling Technology | Cat# 14177 |
| SignalStain® Antibody Diluent | Cell Signaling Technology | Cat# 8112 |
| PGE-it Virus Precipitation Solution | SBI | Cat# LV825A-1 |
| T7 DNA Ligase | NEW ENGLAND Biolabs | Cat# M0318 |
| T4 Polyuncleotide Kinase | NEW ENGLAND Biolabs | Cat# M0201 |
| BSA, Molecular Biology Grade | NEW ENGLAND Biolabs | Cat# B9000 |
| MACS Tissue Storage Solution | Miltenyi Biotec | Cat# 130-100-008 |
| TGX Stain-Free FastCast Acrylamide Kit, 10% | Bio-Rad | Cat# 1610183 |
| DNase I, from bovine pancreas | Roche | Cat# 11284932001 |
| Collagenase, Type IV | Gibco | Cat# 17104019 |
| D-Biotin | Invitrogen | Cat# B20656 |
| **Recombinant DNA** | | |
| pT3-myr-AKT-HA | Addgene | Cat# 31789 |
| pT/Caggs-NRASV12 | Addgene | Cat# 20205 |
| PT2/C-Luc//PGK-SB13 | Addgene | Cat# 20207 |
| pX330 p53 | Addgene | Cat# 59910 |
| pT3-EF1A-MYC-IRES-luc | Addgene | Cat# 129775 |
| pT3-EF1A-MYC-IRES-lucOS | Addgene | Cat# 129776 |
| pCMV(CAT)T7-SB100 | Addgene | Cat# 34879 |
| pT2/CMV-Luc/PGK-SB100X | Addgene | Cat# 192869 |
| pT3-N90-beta-catenin | Addgene | Cat# 31785 |
| pSpCas9(BB)-2A-Puro (PX459) | Addgene | Cat# 48139 |
| pT3-EF1α | Addgene | Cat# 180149 |
| psPAX2 | Addgene | Cat# 12260 |
| pMD2. G | Addgene | Cat# 12259 |
| pLV-GPC3-CD28-41BB-CD3ζ-GFP | Pang et al. | DOI: 10.1186/s13045-021-01128-9 |
| pLV-CMV-OVA (257-264)-hPGK-Neo | VectorBuilder | Cat# VB210810-1335veb |
| pSB-EF1a-Fads1 | VectorBuilder | Cat# VB210414-1040xhm |
| PX459-sgScramble | This paper | N/A |
| PX459-sgFads1 #1 | This paper | N/A |
| PX459-sgFads1 #2 | This paper | N/A |
| **Bacterial and virus strains** | | |
| E. coli DH5α | Takara Bio | Cat# 9057 |
| E. coli STBL3 | Invitrogen | Cat# C737303 |
| scAAV8-scramble shRNA (1013 GC/ml) | Vector Builder | Cat# VB010000-9343nhh |
| scAAV8-Fads1 shRNA (1013 GC/ml) | Vector Builder | Cat# VB211222-1027suz |
| scAAV8-Fads1 shRNA (1013 GC/ml) | Vector Builder | Cat# VB211222-1028rst |
| scAAV8-Fads1 shRNA (1013 GC/ml) | Vector Builder | Cat# VB211222-1029vah |

**1.6 Softwares**

| **Software name** | **Manufacturer** | **Version** |
| --- | --- | --- |
| Gene Set Enrichment Analysis | UC San Diego-Broad Institute | RRID: SCR_003199 |
| GraphPad Prism 9.0 | GraphPad | https://www.graphpad.com/ |
| BBrowser | Bioturing | https://bioturing.com/single-cell-analysis-bbrowserx |
| Talk2Data | Bioturing | https://bioturing.com/single-cell-and-spatial-database-talk2data |
| R Language 4.3.3 | N/A | https://www.r-project.org/ |
| RStudio 2023.6.0 | N/A | https://www.r-project.org/ |
| SPSS 27.0 | International Business Machines Corporation (IBM) | https://www.ibm.com/support/pages/downloading-ibm-spss-statistics-27 |
| FlowJo 10.9 | BD Biosciences | https://www.flowjo.com/ |
| FlowAI | BD Biosciences | https://www.flowjo.com/exchange/#/plugin/profile?id=21 |
| FlowClean | BD Biosciences | https://www.flowjo.com/exchange/#/plugin/profile?id=37 |
| FlowSOM | BD Biosciences | https://www.flowjo.com/exchange/#/plugin/profile?id=7 |
| ClusterExplorer | BD Biosciences | https://www.flowjo.com/exchange/#/plugin/profile?id=30 |
| Seahorse Wave Controller Software 2.6 | Agilent | https://www.agilent.com/en/product/cell-analysis/real-time-cell-metabolic-analysis/xf-software |
| inForm 2.6 | Akoya Biosciences | https://www.akoyabio.com/phenoimager/inform-tissue-finder/ |
| Phenochart 2.2.0 | Akoya Biosciences | https://www.akoyabio.com/support/software/ |
| Living Imaging Software | PerkinElmer | https://www.perkinelmer.com.cn/lab-products-and-services/resources/software-downloads.html |
